# Supplementary material for: Bacterial Communities of Diverse Drosophila Species: Ecological Context of a Host–Microbe Model System
Source: PLoS Genet. 2011 Sep 22;7(9):e1002272. doi: 10.1371/journal.pgen.1002272 (PMC3178584; doi:10.1371/journal.pgen.1002272)
Supplement: Dataset S1 — A more detailed version of Table 1 describing where, when and by whom each sample was collected. (XLS) [file pgen.1002272.s001.xls]

## Sheet: Sheet1
Final Library Name	# sequences	Species	Diet	Location	Intestines/bodies/External	Collection Date	Collector	Notes
CAN	65	D. melanogaster strain Canton-S	Standard Lab Media	Kimbrell lab	intestines	September, 2006	Jenna Morgan Lang and Holly Huse
ELA	82	D. elegans	Alpinia Flowers	Hsinchu, Taiwan	bodies	May, 2007	Chen-Siang Ng
ELD	71	D. elegans	Brugmansia Flowers	Hsinchu, Taiwan	bodies	May, 2007	Chen-Siang Ng
FLV	63	D. flavohirta	Syzigium Flowers	NSW, Australia	bodies	April, 2007	Shane McEvey
FNS	69	D. falleni	Mushroom, Russula sp.	Stony Brook, NY	bodies	August, 2007	John True
HCF	85	D. hydei	Citrus Fruit	Wolfskill Experimental Orchard, Winters, Ca	intestines	May 7th, 2008	Angus Chandler
HPM	171	D. hydei	Pomegranates	Wolfskill Experimental Orchard, Winters, Ca	intestines	September, 2007	Jenna Morgan Lang
HPP	84	D. hydei	Opuntia fruit	UC-Davis Arboretum, Davis, Ca	intestines	May, 2008	Kopp and Barmina
ICF	87	D. immigrans	Citrus Fruit	Wolfskill Experimental Orchard, Winters, Ca	intestines	May 7th, 2008	Angus Chandler
IMH	87	D. sp. aff. immigrans	Hibiscus flowers	Captain Cook, Hawaii	bodies	October 2nd, 2007	Olga Barmina
MAG	77	D. sulfurigaster	Mango Fruit	Waimanu, Hawaii	bodies	May, 2007	Artyom Kopp and Olga Barmina
MAH	144	D. melanogaster	Pile of Grapes	Mahoney Winery, Napa, Ca	intestines	September, 2006	Jenna Morgan Lang
MAW	85	D. melanogaster	Pile of Grapes	Mahoney Winery, Napa, Ca	body	September, 2006	Jenna Morgan Lang
MED	70	Media sample (from D. melanogaster strain WO)	Standard Lab Media	Kopp lab	media/external	August, 2008	Angus Chandler
MIC	79	Microdrosophila sp.	Shelf Fungus	Taiwan	bodies	May, 2007	Chen-Siang Ng
MOV	84	D. mojavensis + D. arizonae	Agria Cactus (Stenocereus gummosus)	Sonora, Mexico	bodies	November, 2007	Bill Etges
ORF	26	D. melanogaster strain Oregon-R	Standard Lab Media	Kimbrell lab	intestines	September, 2006	Jenna Morgan Lang and Holly Huse
ORM	52	D. melanogaster strain Oregon-R	Standard Lab Media	Kimbrell lab	intestines	September, 2006	Jenna Morgan Lang and Holly Huse
POM	67	Unidentified Drosophila	Ipomoea Flowers	Waimanu, Hawaii	bodies	May, 2007	Kopp and Barmina
PON	77	Unidentified Drosophila	Pondanus Fruit	Waimanu, Hawaii	bodies	May, 2007	Kopp and Barmina
SCA	88	Scaptodrosophila hibiscii	Hibiscus Flowers	Queensland, Australia	bodies	April, 2007	Shane McEvey
SEC	91	D. sechellia	Morinda Fruit	Seychellia	bodies	April, 2007	Dephine Legrand and Marie-Louise Cariou
TBB	223	D. melanogaster	Citrus Fruit	Michael Turelli's Orchard, Winters, Ca	intestines	August, 2007	Jenna Morgan Lang and Holly Huse
TKM	36	D. takahashii	Morinda Fruit	Captain Cook, Hawaii	bodies	October 2nd, 2007	Olga Barmina
WOB	84	D. melanogaster strain WO	Standard Lab Media	Kopp lab	bodies	July, 2008	Angus Chandler
WOE	79	D. melanogaster strain WO	Standard Lab Media	Kopp lab	External wash	July, 2008	Angus Chandler
WOG	87	D. melanogaster strain WO	Standard Lab Media	Kopp lab	intestines	July, 2008	Angus Chandler
WOL	70	D. melanogaster strain WO	Standard Lab Media	Kopp lab	3rd Instar Larvae	August, 2008	Angus Chandler
WOP	57	D. melanogaster strain WO	Standard Lab Media	Kopp lab	Late Pupae	August, 2008	Angus Chandler
XDA	72	D. melanogaster strain WO	Agar	Kopp lab	intestines	July, 2008	Angus Chandler
XDE	68	D. melanogaster strain WO	EtOH	Kopp lab	intestines	July, 2008	Angus Chandler
XDM	88	D. melanogaster strain WO	Standard Lab Media	Kopp lab	intestines	July, 2008	Angus Chandler
XDO	173	D. melanogaster strain WO	Standard Lab Media	Kopp lab	intestines	July, 2008	Angus Chandler	Population used to start the multiple diet experiment
XDS	82	D. melanogaster strain WO	Sugar	Kopp lab	intestines	July, 2008	Angus Chandler
XDY	34	D. melanogaster strain WO	HY/LS	Kopp lab	intestines	July, 2008	Angus Chandler
XYE	82	D. elegans	HY/LS	Kopp lab	intestines	June, 2008	Angus Chandler
XYM	90	D. melanogaster strain WO	HY/LS	Kopp lab	intestines	June, 2008	Angus Chandler
XYV	38	D. virilis	HY/LS	Kopp lab	intestines	June, 2008	Angus Chandler
XYX	76	External Wash from D. elegans, D. melanogaster, and D. virilis (samples XYE, XYM, XYV)	HY/LS	Kopp lab	External wash	June, 2008	Angus Chandler
