# Supplementary material for: Bacterial Communities of Diverse Drosophila Species: Ecological Context of a Host–Microbe Model System
Source: PLoS Genet. 2011 Sep 22;7(9):e1002272. doi: 10.1371/journal.pgen.1002272 (PMC3178584; doi:10.1371/journal.pgen.1002272)
Supplement: Dataset S2 — This excel file contains the taxonomy assigned to each sequence used in this study along with information regarding the host species, location, environment and other information regarding the library each sequence belongs to. Additionally, the composition of each OTU can be determined using the unique OTU identifiers (used in Figures S1, S2, S3, S4, and S5 and in the main text). (XLSX) [file pgen.1002272.s002.xlsx]

## Sheet: Pivot Table
Sum of Count	Column Labels
Row Labels	CAN	ELA	ELD	FLV	FNS	HCF	HPM	HPP	ICF	IMH	MAG	MAH	MAW	MED	MIC	MOV	ORF	ORM	POM	PON	SCA	SEC	TBB	TKM	WOB	WOE	WOG	WOL	WOP	XDA	XDE	XDM	XDO	XDS	XDY	XYE	XYM	XYV	XYX	Grand Total
Acetobacter							1						21					9			2		106	1		24			1	1						1			1	168
Acinetobacter		3																																						3
Alcaligenes					1																																			1
Bacteriovorax					1																																			1
Bartonella																					1																			1
Bordetella																					6																			6
Brenneria																						1																		1
Brochothrix					1																																			1
Burkholderia		1	4												3						6																			14
Cellvibrio					1																																			1
Chryseobacterium																	1																							1
Clostridium																				1																				1
Comamonas		2	2		8																1																			13
Commensalibacter			1	1								10			9	1					2	9	1	17	23	2				17				1	3					97
Corynebacterium																	2																							2
Delftia		1																																						1
Dysgonomonas				1	1	3	1		2						1				1		2															1				13
Empedobacter		2																					18																	20
Enterobacteriaceae Group Orbus		4		21	1	73	148	77	56	44				63		70			1		22		3	1	34	7	30	70	50	36	9	79	141	1	19	8	1			1069
Enterococcus					4		1	1							45				2	15				3														1	2	74
Erysipelothrix					1																																			1
Finegoldia																					1																			1
Flavobacterium										1																														1
Gluconobacter							1																3																	4
Haemophilus																					4																			4
Kerstersia									1																															1
Ketogulonicigenium																2																								2
Kurthia					4																																			4
LachnospiraceaeIncertaeSedis		1														5																								6
Lactobacillus		4					1				5	13	63	3	3			1				4	3	8	22	46	57		6	2	1		2		1	6	1		1	253
Lactococcus		7			1										1				1		14																			24
Leucobacter					5																																			5
Leuconostoc		27					11																1		5								1							45
Mesorhizobium																							15																	15
Microbacterium																	8	14																						22
Morganella									7																															7
Mycetocola					1																																			1
Neisseria																					2																			2
Ochrobactrum																							1																	1
PaeniPaenibacillus					1																																			1
Propionibacterium																							15																	15
Providencia					2		1		16					1			8	3			5									16	58	9	29	80	11	59	85	35	11	429
Pseudomonas		1			2										1						2		31																	37
Ralstonia		1													3						2																			6
Schineria																			1																					1
Serratia		17	26	22						1			1	3	1		3	20					10													7	3	2	61	177
Shigella	39											104					1						8	2																154
Staphylococcus					5										1						2																			8
Stenotrophomonas															1																									1
Streptococcus		2													3				1																					6
Unclassified_Alcaligenaceae							1									1																								2
Unclassified_Alphaproteobacteria		1		2																																				3
Unclassified_Betaproteobacteria											1																													1
Unclassified_Burkholderiales																				1																				1
Unclassified_Clostridia																				3																				3
Unclassified_Clostridiales																				1																				1
Unclassified_Comamonadaceae					2																1																			3
Unclassified_Comamonadaceae/Variovorax	25											17											5																	47
Unclassified_Enterobacteriaceae	1				1		1		3						1	2	3	5																						17
Unclassified_Gammaproteobacteria					3	2	1				1				4					1		1		2																15
Unclassified_Lachnospiraceae		3																																						3
Unclassified_Neisseriaceae					1																																			1
Unclassified_Paenibacillaceae										1																														1
Unclassified_Rhizobiaceae																							1																	1
Unclassified_Ruminococcaceae				3																5																				8
Unclassified_Xanthomonadaceae																2																								2
Vagococcus					22	7		6			70				2	1			60	50	1	76		2																297
Variovorax																							2																	2
Weissella			1				3																																	4
Erwinia			6	13					2	2																														23
Pantoea		5	31							38											12																			86
Grand Total	65	82	71	63	69	85	171	84	87	87	77	144	85	70	79	84	26	52	67	77	88	91	223	36	84	79	87	70	57	72	68	88	173	82	34	82	90	38	76	3243

## Sheet: Taxonomy
Count	Sequence ID	OTU identifier used in Text and Trees	Library	Species	Wild or Lab	Diet/Lab	Bodies or Gut	Phylum	Class	Order	Family	Genus
1	XYE_022	TBB_298	XYE	Elegans	Lab	Kopp	Guts	Proteobacteria	Alphaproteobacteria	Rhodospirillales	Acetobacteraceae	Acetobacter
1	ELA_015	ELA_015	ELA	Elegans	Wild	Flower	Bodies	Proteobacteria	Gammaproteobacteria	Pseudomonadales	Moraxellaceae	Acinetobacter
1	ELA_085	ELA_015	ELA	Elegans	Wild	Flower	Bodies	Proteobacteria	Gammaproteobacteria	Pseudomonadales	Moraxellaceae	Acinetobacter
1	ELA_088	ELA_015	ELA	Elegans	Wild	Flower	Bodies	Proteobacteria	Gammaproteobacteria	Pseudomonadales	Moraxellaceae	Acinetobacter
1	ELA_007	SCA_129	ELA	Elegans	Wild	Flower	Bodies	Proteobacteria	Betaproteobacteria	Burkholderiales	Burkholderiaceae	Burkholderia
1	ELD_003	ELD_016	ELD	Elegans	Wild	Flower	Bodies	Proteobacteria	Betaproteobacteria	Burkholderiales	Burkholderiaceae	Burkholderia
1	ELD_016	ELD_016	ELD	Elegans	Wild	Flower	Bodies	Proteobacteria	Betaproteobacteria	Burkholderiales	Burkholderiaceae	Burkholderia
1	ELD_026	ELD_016	ELD	Elegans	Wild	Flower	Bodies	Proteobacteria	Betaproteobacteria	Burkholderiales	Burkholderiaceae	Burkholderia
1	ELD_060	ELD_016	ELD	Elegans	Wild	Flower	Bodies	Proteobacteria	Betaproteobacteria	Burkholderiales	Burkholderiaceae	Burkholderia
1	ELA_045	ELD_081	ELA	Elegans	Wild	Flower	Bodies	Proteobacteria	Betaproteobacteria	Burkholderiales	Comamonadaceae	Comamonas
1	ELA_059	ELD_081	ELA	Elegans	Wild	Flower	Bodies	Proteobacteria	Betaproteobacteria	Burkholderiales	Comamonadaceae	Comamonas
1	ELD_010	ELD_081	ELD	Elegans	Wild	Flower	Bodies	Proteobacteria	Betaproteobacteria	Burkholderiales	Comamonadaceae	Comamonas
1	ELD_081	ELD_081	ELD	Elegans	Wild	Flower	Bodies	Proteobacteria	Betaproteobacteria	Burkholderiales	Comamonadaceae	Comamonas
1	ELA_013	ELA_013	ELA	Elegans	Wild	Flower	Bodies	Proteobacteria	Betaproteobacteria	Burkholderiales	Comamonadaceae	Delftia
1	XYE_055	XYE_055	XYE	Elegans	Lab	Kopp	Guts	Bacteroidetes	Bacteroidetes	Bacteroidales	Porphyromonadaceae	Dysgonomonas
1	ELA_029	ELA_040	ELA	Elegans	Wild	Flower	Bodies	Bacteroidetes	Flavobacteria	Flavobacteriales	Flavobacteriaceae	Empedobacter
1	ELA_040	ELA_040	ELA	Elegans	Wild	Flower	Bodies	Bacteroidetes	Flavobacteria	Flavobacteriales	Flavobacteriaceae	Empedobacter
1	ELA_064	ELA_064	ELA	Elegans	Wild	Flower	Bodies	Firmicutes	Clostridia	Clostridiales	Lachnospiraceae	LachnospiraceaeIncertaeSedis
1	XYE_030	WOG_027	XYE	Elegans	Lab	Kopp	Guts	Firmicutes	Bacilli	Lactobacillales	Lactobacillaceae	Lactobacillus
1	XYE_011	WOG_027	XYE	Elegans	Lab	Kopp	Guts	Firmicutes	Bacilli	Lactobacillales	Lactobacillaceae	Lactobacillus
1	XYE_103	WOG_027	XYE	Elegans	Lab	Kopp	Guts	Firmicutes	Bacilli	Lactobacillales	Lactobacillaceae	Lactobacillus
1	XYE_114	WOG_027	XYE	Elegans	Lab	Kopp	Guts	Firmicutes	Bacilli	Lactobacillales	Lactobacillaceae	Lactobacillus
1	XYE_045	WOG_027	XYE	Elegans	Lab	Kopp	Guts	Firmicutes	Bacilli	Lactobacillales	Lactobacillaceae	Lactobacillus
1	XYE_105	WOG_027	XYE	Elegans	Lab	Kopp	Guts	Firmicutes	Bacilli	Lactobacillales	Lactobacillaceae	Lactobacillus
1	ELA_008	WOG_027	ELA	Elegans	Wild	Flower	Bodies	Firmicutes	Bacilli	Lactobacillales	Lactobacillaceae	Lactobacillus
1	ELA_072	WOG_027	ELA	Elegans	Wild	Flower	Bodies	Firmicutes	Bacilli	Lactobacillales	Lactobacillaceae	Lactobacillus
1	ELA_025	MIC_087	ELA	Elegans	Wild	Flower	Bodies	Firmicutes	Bacilli	Lactobacillales	Lactobacillaceae	Lactobacillus
1	ELA_031	MIC_087	ELA	Elegans	Wild	Flower	Bodies	Firmicutes	Bacilli	Lactobacillales	Lactobacillaceae	Lactobacillus
1	ELA_003	SCA_160	ELA	Elegans	Wild	Flower	Bodies	Firmicutes	Bacilli	Lactobacillales	Streptococcaceae	Lactococcus
1	ELA_005	SCA_160	ELA	Elegans	Wild	Flower	Bodies	Firmicutes	Bacilli	Lactobacillales	Streptococcaceae	Lactococcus
1	ELA_012	SCA_160	ELA	Elegans	Wild	Flower	Bodies	Firmicutes	Bacilli	Lactobacillales	Streptococcaceae	Lactococcus
1	ELA_020	SCA_160	ELA	Elegans	Wild	Flower	Bodies	Firmicutes	Bacilli	Lactobacillales	Streptococcaceae	Lactococcus
1	ELA_021	SCA_160	ELA	Elegans	Wild	Flower	Bodies	Firmicutes	Bacilli	Lactobacillales	Streptococcaceae	Lactococcus
1	ELA_022	SCA_160	ELA	Elegans	Wild	Flower	Bodies	Firmicutes	Bacilli	Lactobacillales	Streptococcaceae	Lactococcus
1	ELA_077	SCA_160	ELA	Elegans	Wild	Flower	Bodies	Firmicutes	Bacilli	Lactobacillales	Streptococcaceae	Lactococcus
1	ELA_001	ELA_001	ELA	Elegans	Wild	Flower	Bodies	Firmicutes	Bacilli	Lactobacillales	Leuconostocaceae	Leuconostoc
1	ELA_019	ELA_001	ELA	Elegans	Wild	Flower	Bodies	Firmicutes	Bacilli	Lactobacillales	Leuconostocaceae	Leuconostoc
1	ELA_035	ELA_001	ELA	Elegans	Wild	Flower	Bodies	Firmicutes	Bacilli	Lactobacillales	Leuconostocaceae	Leuconostoc
1	ELA_041	ELA_001	ELA	Elegans	Wild	Flower	Bodies	Firmicutes	Bacilli	Lactobacillales	Leuconostocaceae	Leuconostoc
1	ELA_046	ELA_001	ELA	Elegans	Wild	Flower	Bodies	Firmicutes	Bacilli	Lactobacillales	Leuconostocaceae	Leuconostoc
1	ELA_048	ELA_001	ELA	Elegans	Wild	Flower	Bodies	Firmicutes	Bacilli	Lactobacillales	Leuconostocaceae	Leuconostoc
1	ELA_050	ELA_001	ELA	Elegans	Wild	Flower	Bodies	Firmicutes	Bacilli	Lactobacillales	Leuconostocaceae	Leuconostoc
1	ELA_052	ELA_001	ELA	Elegans	Wild	Flower	Bodies	Firmicutes	Bacilli	Lactobacillales	Leuconostocaceae	Leuconostoc
1	ELA_054	ELA_001	ELA	Elegans	Wild	Flower	Bodies	Firmicutes	Bacilli	Lactobacillales	Leuconostocaceae	Leuconostoc
1	ELA_062	ELA_001	ELA	Elegans	Wild	Flower	Bodies	Firmicutes	Bacilli	Lactobacillales	Leuconostocaceae	Leuconostoc
1	ELA_067	ELA_001	ELA	Elegans	Wild	Flower	Bodies	Firmicutes	Bacilli	Lactobacillales	Leuconostocaceae	Leuconostoc
1	ELA_071	ELA_001	ELA	Elegans	Wild	Flower	Bodies	Firmicutes	Bacilli	Lactobacillales	Leuconostocaceae	Leuconostoc
1	ELA_076	ELA_001	ELA	Elegans	Wild	Flower	Bodies	Firmicutes	Bacilli	Lactobacillales	Leuconostocaceae	Leuconostoc
1	ELA_079	ELA_001	ELA	Elegans	Wild	Flower	Bodies	Firmicutes	Bacilli	Lactobacillales	Leuconostocaceae	Leuconostoc
1	ELA_080	ELA_001	ELA	Elegans	Wild	Flower	Bodies	Firmicutes	Bacilli	Lactobacillales	Leuconostocaceae	Leuconostoc
1	ELA_081	ELA_001	ELA	Elegans	Wild	Flower	Bodies	Firmicutes	Bacilli	Lactobacillales	Leuconostocaceae	Leuconostoc
1	ELA_084	ELA_001	ELA	Elegans	Wild	Flower	Bodies	Firmicutes	Bacilli	Lactobacillales	Leuconostocaceae	Leuconostoc
1	ELA_004	HPM_219	ELA	Elegans	Wild	Flower	Bodies	Firmicutes	Bacilli	Lactobacillales	Leuconostocaceae	Leuconostoc
1	ELA_010	HPM_219	ELA	Elegans	Wild	Flower	Bodies	Firmicutes	Bacilli	Lactobacillales	Leuconostocaceae	Leuconostoc
1	ELA_030	HPM_219	ELA	Elegans	Wild	Flower	Bodies	Firmicutes	Bacilli	Lactobacillales	Leuconostocaceae	Leuconostoc
1	ELA_042	HPM_219	ELA	Elegans	Wild	Flower	Bodies	Firmicutes	Bacilli	Lactobacillales	Leuconostocaceae	Leuconostoc
1	ELA_056	HPM_219	ELA	Elegans	Wild	Flower	Bodies	Firmicutes	Bacilli	Lactobacillales	Leuconostocaceae	Leuconostoc
1	ELA_065	HPM_219	ELA	Elegans	Wild	Flower	Bodies	Firmicutes	Bacilli	Lactobacillales	Leuconostocaceae	Leuconostoc
1	ELA_070	HPM_219	ELA	Elegans	Wild	Flower	Bodies	Firmicutes	Bacilli	Lactobacillales	Leuconostocaceae	Leuconostoc
1	ELA_087	HPM_219	ELA	Elegans	Wild	Flower	Bodies	Firmicutes	Bacilli	Lactobacillales	Leuconostocaceae	Leuconostoc
1	ELA_089	HPM_219	ELA	Elegans	Wild	Flower	Bodies	Firmicutes	Bacilli	Lactobacillales	Leuconostocaceae	Leuconostoc
1	ELA_091	HPM_219	ELA	Elegans	Wild	Flower	Bodies	Firmicutes	Bacilli	Lactobacillales	Leuconostocaceae	Leuconostoc
1	XYE_020	XYM_085	XYE	Elegans	Lab	Kopp	Guts	Proteobacteria	Gammaproteobacteria	Enterobacteriales	Enterobacteriaceae	Providencia
1	XYE_100	XYM_085	XYE	Elegans	Lab	Kopp	Guts	Proteobacteria	Gammaproteobacteria	Enterobacteriales	Enterobacteriaceae	Providencia
1	XYE_110	XYM_085	XYE	Elegans	Lab	Kopp	Guts	Proteobacteria	Gammaproteobacteria	Enterobacteriales	Enterobacteriaceae	Providencia
1	XYE_051	XYM_085	XYE	Elegans	Lab	Kopp	Guts	Proteobacteria	Gammaproteobacteria	Enterobacteriales	Enterobacteriaceae	Providencia
1	XYE_061	XYM_085	XYE	Elegans	Lab	Kopp	Guts	Proteobacteria	Gammaproteobacteria	Enterobacteriales	Enterobacteriaceae	Providencia
1	XYE_091	XYM_085	XYE	Elegans	Lab	Kopp	Guts	Proteobacteria	Gammaproteobacteria	Enterobacteriales	Enterobacteriaceae	Providencia
1	XYE_101	XYM_085	XYE	Elegans	Lab	Kopp	Guts	Proteobacteria	Gammaproteobacteria	Enterobacteriales	Enterobacteriaceae	Providencia
1	XYE_111	XYM_085	XYE	Elegans	Lab	Kopp	Guts	Proteobacteria	Gammaproteobacteria	Enterobacteriales	Enterobacteriaceae	Providencia
1	XYE_042	XYM_085	XYE	Elegans	Lab	Kopp	Guts	Proteobacteria	Gammaproteobacteria	Enterobacteriales	Enterobacteriaceae	Providencia
1	XYE_052	XYM_085	XYE	Elegans	Lab	Kopp	Guts	Proteobacteria	Gammaproteobacteria	Enterobacteriales	Enterobacteriaceae	Providencia
1	XYE_062	XYM_085	XYE	Elegans	Lab	Kopp	Guts	Proteobacteria	Gammaproteobacteria	Enterobacteriales	Enterobacteriaceae	Providencia
1	XYE_082	XYM_085	XYE	Elegans	Lab	Kopp	Guts	Proteobacteria	Gammaproteobacteria	Enterobacteriales	Enterobacteriaceae	Providencia
1	XYE_092	XYM_085	XYE	Elegans	Lab	Kopp	Guts	Proteobacteria	Gammaproteobacteria	Enterobacteriales	Enterobacteriaceae	Providencia
1	XYE_003	XYM_085	XYE	Elegans	Lab	Kopp	Guts	Proteobacteria	Gammaproteobacteria	Enterobacteriales	Enterobacteriaceae	Providencia
1	XYE_013	XYM_085	XYE	Elegans	Lab	Kopp	Guts	Proteobacteria	Gammaproteobacteria	Enterobacteriales	Enterobacteriaceae	Providencia
1	XYE_033	XYM_085	XYE	Elegans	Lab	Kopp	Guts	Proteobacteria	Gammaproteobacteria	Enterobacteriales	Enterobacteriaceae	Providencia
1	XYE_043	XYM_085	XYE	Elegans	Lab	Kopp	Guts	Proteobacteria	Gammaproteobacteria	Enterobacteriales	Enterobacteriaceae	Providencia
1	XYE_053	XYM_085	XYE	Elegans	Lab	Kopp	Guts	Proteobacteria	Gammaproteobacteria	Enterobacteriales	Enterobacteriaceae	Providencia
1	XYE_063	XYM_085	XYE	Elegans	Lab	Kopp	Guts	Proteobacteria	Gammaproteobacteria	Enterobacteriales	Enterobacteriaceae	Providencia
1	XYE_083	XYM_085	XYE	Elegans	Lab	Kopp	Guts	Proteobacteria	Gammaproteobacteria	Enterobacteriales	Enterobacteriaceae	Providencia
1	XYE_093	XYM_085	XYE	Elegans	Lab	Kopp	Guts	Proteobacteria	Gammaproteobacteria	Enterobacteriales	Enterobacteriaceae	Providencia
1	XYE_014	XYM_085	XYE	Elegans	Lab	Kopp	Guts	Proteobacteria	Gammaproteobacteria	Enterobacteriales	Enterobacteriaceae	Providencia
1	XYE_024	XYM_085	XYE	Elegans	Lab	Kopp	Guts	Proteobacteria	Gammaproteobacteria	Enterobacteriales	Enterobacteriaceae	Providencia
1	XYE_034	XYM_085	XYE	Elegans	Lab	Kopp	Guts	Proteobacteria	Gammaproteobacteria	Enterobacteriales	Enterobacteriaceae	Providencia
1	XYE_044	XYM_085	XYE	Elegans	Lab	Kopp	Guts	Proteobacteria	Gammaproteobacteria	Enterobacteriales	Enterobacteriaceae	Providencia
1	XYE_054	XYM_085	XYE	Elegans	Lab	Kopp	Guts	Proteobacteria	Gammaproteobacteria	Enterobacteriales	Enterobacteriaceae	Providencia
1	XYE_074	XYM_085	XYE	Elegans	Lab	Kopp	Guts	Proteobacteria	Gammaproteobacteria	Enterobacteriales	Enterobacteriaceae	Providencia
1	XYE_084	XYM_085	XYE	Elegans	Lab	Kopp	Guts	Proteobacteria	Gammaproteobacteria	Enterobacteriales	Enterobacteriaceae	Providencia
1	XYE_124	XYM_085	XYE	Elegans	Lab	Kopp	Guts	Proteobacteria	Gammaproteobacteria	Enterobacteriales	Enterobacteriaceae	Providencia
1	XYE_015	XYM_085	XYE	Elegans	Lab	Kopp	Guts	Proteobacteria	Gammaproteobacteria	Enterobacteriales	Enterobacteriaceae	Providencia
1	XYE_025	XYM_085	XYE	Elegans	Lab	Kopp	Guts	Proteobacteria	Gammaproteobacteria	Enterobacteriales	Enterobacteriaceae	Providencia
1	XYE_065	XYM_085	XYE	Elegans	Lab	Kopp	Guts	Proteobacteria	Gammaproteobacteria	Enterobacteriales	Enterobacteriaceae	Providencia
1	XYE_085	XYM_085	XYE	Elegans	Lab	Kopp	Guts	Proteobacteria	Gammaproteobacteria	Enterobacteriales	Enterobacteriaceae	Providencia
1	XYE_095	XYM_085	XYE	Elegans	Lab	Kopp	Guts	Proteobacteria	Gammaproteobacteria	Enterobacteriales	Enterobacteriaceae	Providencia
1	XYE_115	XYM_085	XYE	Elegans	Lab	Kopp	Guts	Proteobacteria	Gammaproteobacteria	Enterobacteriales	Enterobacteriaceae	Providencia
1	XYE_125	XYM_085	XYE	Elegans	Lab	Kopp	Guts	Proteobacteria	Gammaproteobacteria	Enterobacteriales	Enterobacteriaceae	Providencia
1	XYE_036	XYM_085	XYE	Elegans	Lab	Kopp	Guts	Proteobacteria	Gammaproteobacteria	Enterobacteriales	Enterobacteriaceae	Providencia
1	XYE_046	XYM_085	XYE	Elegans	Lab	Kopp	Guts	Proteobacteria	Gammaproteobacteria	Enterobacteriales	Enterobacteriaceae	Providencia
1	XYE_086	XYM_085	XYE	Elegans	Lab	Kopp	Guts	Proteobacteria	Gammaproteobacteria	Enterobacteriales	Enterobacteriaceae	Providencia
1	XYE_096	XYM_085	XYE	Elegans	Lab	Kopp	Guts	Proteobacteria	Gammaproteobacteria	Enterobacteriales	Enterobacteriaceae	Providencia
1	XYE_106	XYM_085	XYE	Elegans	Lab	Kopp	Guts	Proteobacteria	Gammaproteobacteria	Enterobacteriales	Enterobacteriaceae	Providencia
1	XYE_116	XYM_085	XYE	Elegans	Lab	Kopp	Guts	Proteobacteria	Gammaproteobacteria	Enterobacteriales	Enterobacteriaceae	Providencia
1	XYE_037	XYM_085	XYE	Elegans	Lab	Kopp	Guts	Proteobacteria	Gammaproteobacteria	Enterobacteriales	Enterobacteriaceae	Providencia
1	XYE_077	XYM_085	XYE	Elegans	Lab	Kopp	Guts	Proteobacteria	Gammaproteobacteria	Enterobacteriales	Enterobacteriaceae	Providencia
1	XYE_087	XYM_085	XYE	Elegans	Lab	Kopp	Guts	Proteobacteria	Gammaproteobacteria	Enterobacteriales	Enterobacteriaceae	Providencia
1	XYE_097	XYM_085	XYE	Elegans	Lab	Kopp	Guts	Proteobacteria	Gammaproteobacteria	Enterobacteriales	Enterobacteriaceae	Providencia
1	XYE_018	XYM_085	XYE	Elegans	Lab	Kopp	Guts	Proteobacteria	Gammaproteobacteria	Enterobacteriales	Enterobacteriaceae	Providencia
1	XYE_028	XYM_085	XYE	Elegans	Lab	Kopp	Guts	Proteobacteria	Gammaproteobacteria	Enterobacteriales	Enterobacteriaceae	Providencia
1	XYE_088	XYM_085	XYE	Elegans	Lab	Kopp	Guts	Proteobacteria	Gammaproteobacteria	Enterobacteriales	Enterobacteriaceae	Providencia
1	XYE_108	XYM_085	XYE	Elegans	Lab	Kopp	Guts	Proteobacteria	Gammaproteobacteria	Enterobacteriales	Enterobacteriaceae	Providencia
1	XYE_009	XYM_085	XYE	Elegans	Lab	Kopp	Guts	Proteobacteria	Gammaproteobacteria	Enterobacteriales	Enterobacteriaceae	Providencia
1	XYE_019	XYM_085	XYE	Elegans	Lab	Kopp	Guts	Proteobacteria	Gammaproteobacteria	Enterobacteriales	Enterobacteriaceae	Providencia
1	XYE_049	XYM_085	XYE	Elegans	Lab	Kopp	Guts	Proteobacteria	Gammaproteobacteria	Enterobacteriales	Enterobacteriaceae	Providencia
1	XYE_059	XYM_085	XYE	Elegans	Lab	Kopp	Guts	Proteobacteria	Gammaproteobacteria	Enterobacteriales	Enterobacteriaceae	Providencia
1	XYE_069	XYM_085	XYE	Elegans	Lab	Kopp	Guts	Proteobacteria	Gammaproteobacteria	Enterobacteriales	Enterobacteriaceae	Providencia
1	XYE_079	XYM_085	XYE	Elegans	Lab	Kopp	Guts	Proteobacteria	Gammaproteobacteria	Enterobacteriales	Enterobacteriaceae	Providencia
1	XYE_089	XYM_085	XYE	Elegans	Lab	Kopp	Guts	Proteobacteria	Gammaproteobacteria	Enterobacteriales	Enterobacteriaceae	Providencia
1	XYE_099	XYM_085	XYE	Elegans	Lab	Kopp	Guts	Proteobacteria	Gammaproteobacteria	Enterobacteriales	Enterobacteriaceae	Providencia
1	XYE_109	XYM_085	XYE	Elegans	Lab	Kopp	Guts	Proteobacteria	Gammaproteobacteria	Enterobacteriales	Enterobacteriaceae	Providencia
1	ELA_095	ELA_095	ELA	Elegans	Wild	Flower	Bodies	Proteobacteria	Gammaproteobacteria	Pseudomonadales	Pseudomonadaceae	Pseudomonas
1	ELA_060	MIC_020	ELA	Elegans	Wild	Flower	Bodies	Proteobacteria	Betaproteobacteria	Burkholderiales	Burkholderiaceae	Ralstonia
1	XYE_006	XYX_081	XYE	Elegans	Lab	Kopp	Guts	Proteobacteria	Gammaproteobacteria	Enterobacteriales	Enterobacteriaceae	Serratia
1	XYE_010	XYX_081	XYE	Elegans	Lab	Kopp	Guts	Proteobacteria	Gammaproteobacteria	Enterobacteriales	Enterobacteriaceae	Serratia
1	XYE_047	XYX_081	XYE	Elegans	Lab	Kopp	Guts	Proteobacteria	Gammaproteobacteria	Enterobacteriales	Enterobacteriaceae	Serratia
1	XYE_060	XYX_081	XYE	Elegans	Lab	Kopp	Guts	Proteobacteria	Gammaproteobacteria	Enterobacteriales	Enterobacteriaceae	Serratia
1	XYE_107	XYX_081	XYE	Elegans	Lab	Kopp	Guts	Proteobacteria	Gammaproteobacteria	Enterobacteriales	Enterobacteriaceae	Serratia
1	XYE_113	XYX_081	XYE	Elegans	Lab	Kopp	Guts	Proteobacteria	Gammaproteobacteria	Enterobacteriales	Enterobacteriaceae	Serratia
1	XYE_123	XYX_081	XYE	Elegans	Lab	Kopp	Guts	Proteobacteria	Gammaproteobacteria	Enterobacteriales	Enterobacteriaceae	Serratia
1	ELA_011	XYX_081	ELA	Elegans	Wild	Flower	Bodies	Proteobacteria	Gammaproteobacteria	Enterobacteriales	Enterobacteriaceae	Serratia
1	ELA_014	XYX_081	ELA	Elegans	Wild	Flower	Bodies	Proteobacteria	Gammaproteobacteria	Enterobacteriales	Enterobacteriaceae	Serratia
1	ELA_016	XYX_081	ELA	Elegans	Wild	Flower	Bodies	Proteobacteria	Gammaproteobacteria	Enterobacteriales	Enterobacteriaceae	Serratia
1	ELA_018	XYX_081	ELA	Elegans	Wild	Flower	Bodies	Proteobacteria	Gammaproteobacteria	Enterobacteriales	Enterobacteriaceae	Serratia
1	ELA_026	XYX_081	ELA	Elegans	Wild	Flower	Bodies	Proteobacteria	Gammaproteobacteria	Enterobacteriales	Enterobacteriaceae	Serratia
1	ELA_028	XYX_081	ELA	Elegans	Wild	Flower	Bodies	Proteobacteria	Gammaproteobacteria	Enterobacteriales	Enterobacteriaceae	Serratia
1	ELA_032	XYX_081	ELA	Elegans	Wild	Flower	Bodies	Proteobacteria	Gammaproteobacteria	Enterobacteriales	Enterobacteriaceae	Serratia
1	ELA_033	XYX_081	ELA	Elegans	Wild	Flower	Bodies	Proteobacteria	Gammaproteobacteria	Enterobacteriales	Enterobacteriaceae	Serratia
1	ELA_051	XYX_081	ELA	Elegans	Wild	Flower	Bodies	Proteobacteria	Gammaproteobacteria	Enterobacteriales	Enterobacteriaceae	Serratia
1	ELA_057	XYX_081	ELA	Elegans	Wild	Flower	Bodies	Proteobacteria	Gammaproteobacteria	Enterobacteriales	Enterobacteriaceae	Serratia
1	ELA_058	XYX_081	ELA	Elegans	Wild	Flower	Bodies	Proteobacteria	Gammaproteobacteria	Enterobacteriales	Enterobacteriaceae	Serratia
1	ELA_068	XYX_081	ELA	Elegans	Wild	Flower	Bodies	Proteobacteria	Gammaproteobacteria	Enterobacteriales	Enterobacteriaceae	Serratia
1	ELA_069	XYX_081	ELA	Elegans	Wild	Flower	Bodies	Proteobacteria	Gammaproteobacteria	Enterobacteriales	Enterobacteriaceae	Serratia
1	ELA_073	XYX_081	ELA	Elegans	Wild	Flower	Bodies	Proteobacteria	Gammaproteobacteria	Enterobacteriales	Enterobacteriaceae	Serratia
1	ELA_075	XYX_081	ELA	Elegans	Wild	Flower	Bodies	Proteobacteria	Gammaproteobacteria	Enterobacteriales	Enterobacteriaceae	Serratia
1	ELA_092	XYX_081	ELA	Elegans	Wild	Flower	Bodies	Proteobacteria	Gammaproteobacteria	Enterobacteriales	Enterobacteriaceae	Serratia
1	ELA_096	XYX_081	ELA	Elegans	Wild	Flower	Bodies	Proteobacteria	Gammaproteobacteria	Enterobacteriales	Enterobacteriaceae	Serratia
1	ELD_001	XYX_081	ELD	Elegans	Wild	Flower	Bodies	Proteobacteria	Gammaproteobacteria	Enterobacteriales	Enterobacteriaceae	Serratia
1	ELD_002	XYX_081	ELD	Elegans	Wild	Flower	Bodies	Proteobacteria	Gammaproteobacteria	Enterobacteriales	Enterobacteriaceae	Serratia
1	ELD_004	XYX_081	ELD	Elegans	Wild	Flower	Bodies	Proteobacteria	Gammaproteobacteria	Enterobacteriales	Enterobacteriaceae	Serratia
1	ELD_008	XYX_081	ELD	Elegans	Wild	Flower	Bodies	Proteobacteria	Gammaproteobacteria	Enterobacteriales	Enterobacteriaceae	Serratia
1	ELD_019	XYX_081	ELD	Elegans	Wild	Flower	Bodies	Proteobacteria	Gammaproteobacteria	Enterobacteriales	Enterobacteriaceae	Serratia
1	ELD_020	XYX_081	ELD	Elegans	Wild	Flower	Bodies	Proteobacteria	Gammaproteobacteria	Enterobacteriales	Enterobacteriaceae	Serratia
1	ELD_022	XYX_081	ELD	Elegans	Wild	Flower	Bodies	Proteobacteria	Gammaproteobacteria	Enterobacteriales	Enterobacteriaceae	Serratia
1	ELD_024	XYX_081	ELD	Elegans	Wild	Flower	Bodies	Proteobacteria	Gammaproteobacteria	Enterobacteriales	Enterobacteriaceae	Serratia
1	ELD_030	XYX_081	ELD	Elegans	Wild	Flower	Bodies	Proteobacteria	Gammaproteobacteria	Enterobacteriales	Enterobacteriaceae	Serratia
1	ELD_031	XYX_081	ELD	Elegans	Wild	Flower	Bodies	Proteobacteria	Gammaproteobacteria	Enterobacteriales	Enterobacteriaceae	Serratia
1	ELD_034	XYX_081	ELD	Elegans	Wild	Flower	Bodies	Proteobacteria	Gammaproteobacteria	Enterobacteriales	Enterobacteriaceae	Serratia
1	ELD_038	XYX_081	ELD	Elegans	Wild	Flower	Bodies	Proteobacteria	Gammaproteobacteria	Enterobacteriales	Enterobacteriaceae	Serratia
1	ELD_041	XYX_081	ELD	Elegans	Wild	Flower	Bodies	Proteobacteria	Gammaproteobacteria	Enterobacteriales	Enterobacteriaceae	Serratia
1	ELD_045	XYX_081	ELD	Elegans	Wild	Flower	Bodies	Proteobacteria	Gammaproteobacteria	Enterobacteriales	Enterobacteriaceae	Serratia
1	ELD_047	XYX_081	ELD	Elegans	Wild	Flower	Bodies	Proteobacteria	Gammaproteobacteria	Enterobacteriales	Enterobacteriaceae	Serratia
1	ELD_048	XYX_081	ELD	Elegans	Wild	Flower	Bodies	Proteobacteria	Gammaproteobacteria	Enterobacteriales	Enterobacteriaceae	Serratia
1	ELD_049	XYX_081	ELD	Elegans	Wild	Flower	Bodies	Proteobacteria	Gammaproteobacteria	Enterobacteriales	Enterobacteriaceae	Serratia
1	ELD_050	XYX_081	ELD	Elegans	Wild	Flower	Bodies	Proteobacteria	Gammaproteobacteria	Enterobacteriales	Enterobacteriaceae	Serratia
1	ELD_059	XYX_081	ELD	Elegans	Wild	Flower	Bodies	Proteobacteria	Gammaproteobacteria	Enterobacteriales	Enterobacteriaceae	Serratia
1	ELD_065	XYX_081	ELD	Elegans	Wild	Flower	Bodies	Proteobacteria	Gammaproteobacteria	Enterobacteriales	Enterobacteriaceae	Serratia
1	ELD_069	XYX_081	ELD	Elegans	Wild	Flower	Bodies	Proteobacteria	Gammaproteobacteria	Enterobacteriales	Enterobacteriaceae	Serratia
1	ELD_076	XYX_081	ELD	Elegans	Wild	Flower	Bodies	Proteobacteria	Gammaproteobacteria	Enterobacteriales	Enterobacteriaceae	Serratia
1	ELD_083	XYX_081	ELD	Elegans	Wild	Flower	Bodies	Proteobacteria	Gammaproteobacteria	Enterobacteriales	Enterobacteriaceae	Serratia
1	ELD_085	XYX_081	ELD	Elegans	Wild	Flower	Bodies	Proteobacteria	Gammaproteobacteria	Enterobacteriales	Enterobacteriaceae	Serratia
1	ELD_086	XYX_081	ELD	Elegans	Wild	Flower	Bodies	Proteobacteria	Gammaproteobacteria	Enterobacteriales	Enterobacteriaceae	Serratia
1	ELD_090	XYX_081	ELD	Elegans	Wild	Flower	Bodies	Proteobacteria	Gammaproteobacteria	Enterobacteriales	Enterobacteriaceae	Serratia
1	ELA_039	ELA_063	ELA	Elegans	Wild	Flower	Bodies	Firmicutes	Bacilli	Lactobacillales	Streptococcaceae	Streptococcus
1	ELA_063	ELA_063	ELA	Elegans	Wild	Flower	Bodies	Firmicutes	Bacilli	Lactobacillales	Streptococcaceae	Streptococcus
1	ELD_077	TKM_092	ELD	Elegans	Wild	Flower	Bodies	Proteobacteria	Alphaproteobacteria	Rhodospirillales	Acetobacteraceae	Commensalibacter
1	ELA_006	ELA_006	ELA	Elegans	Wild	Flower	Bodies	Proteobacteria	Alphaproteobacteria	Unclassified_Alphaproteobacteria	Unclassified_Alphaproteobacteria	Unclassified_Alphaproteobacteria
1	ELD_006	FLV_010	ELD	Elegans	Wild	Flower	Bodies	Proteobacteria	Gammaproteobacteria	Enterobacteriales	Enterobacteriaceae	Erwinia
1	ELD_014	FLV_010	ELD	Elegans	Wild	Flower	Bodies	Proteobacteria	Gammaproteobacteria	Enterobacteriales	Enterobacteriaceae	Erwinia
1	ELD_037	FLV_010	ELD	Elegans	Wild	Flower	Bodies	Proteobacteria	Gammaproteobacteria	Enterobacteriales	Enterobacteriaceae	Erwinia
1	ELD_052	FLV_010	ELD	Elegans	Wild	Flower	Bodies	Proteobacteria	Gammaproteobacteria	Enterobacteriales	Enterobacteriaceae	Erwinia
1	ELD_087	FLV_010	ELD	Elegans	Wild	Flower	Bodies	Proteobacteria	Gammaproteobacteria	Enterobacteriales	Enterobacteriaceae	Erwinia
1	ELD_091	FLV_010	ELD	Elegans	Wild	Flower	Bodies	Proteobacteria	Gammaproteobacteria	Enterobacteriales	Enterobacteriaceae	Erwinia
1	ELD_007	ELD_039	ELD	Elegans	Wild	Flower	Bodies	Proteobacteria	Gammaproteobacteria	Enterobacteriales	Enterobacteriaceae	Pantoea
1	ELD_009	ELD_039	ELD	Elegans	Wild	Flower	Bodies	Proteobacteria	Gammaproteobacteria	Enterobacteriales	Enterobacteriaceae	Pantoea
1	ELD_012	ELD_039	ELD	Elegans	Wild	Flower	Bodies	Proteobacteria	Gammaproteobacteria	Enterobacteriales	Enterobacteriaceae	Pantoea
1	ELD_015	ELD_039	ELD	Elegans	Wild	Flower	Bodies	Proteobacteria	Gammaproteobacteria	Enterobacteriales	Enterobacteriaceae	Pantoea
1	ELD_025	ELD_039	ELD	Elegans	Wild	Flower	Bodies	Proteobacteria	Gammaproteobacteria	Enterobacteriales	Enterobacteriaceae	Pantoea
1	ELD_028	ELD_039	ELD	Elegans	Wild	Flower	Bodies	Proteobacteria	Gammaproteobacteria	Enterobacteriales	Enterobacteriaceae	Pantoea
1	ELD_029	ELD_039	ELD	Elegans	Wild	Flower	Bodies	Proteobacteria	Gammaproteobacteria	Enterobacteriales	Enterobacteriaceae	Pantoea
1	ELD_033	ELD_039	ELD	Elegans	Wild	Flower	Bodies	Proteobacteria	Gammaproteobacteria	Enterobacteriales	Enterobacteriaceae	Pantoea
1	ELD_036	ELD_039	ELD	Elegans	Wild	Flower	Bodies	Proteobacteria	Gammaproteobacteria	Enterobacteriales	Enterobacteriaceae	Pantoea
1	ELD_039	ELD_039	ELD	Elegans	Wild	Flower	Bodies	Proteobacteria	Gammaproteobacteria	Enterobacteriales	Enterobacteriaceae	Pantoea
1	ELD_042	ELD_039	ELD	Elegans	Wild	Flower	Bodies	Proteobacteria	Gammaproteobacteria	Enterobacteriales	Enterobacteriaceae	Pantoea
1	ELD_054	ELD_039	ELD	Elegans	Wild	Flower	Bodies	Proteobacteria	Gammaproteobacteria	Enterobacteriales	Enterobacteriaceae	Pantoea
1	ELD_055	ELD_039	ELD	Elegans	Wild	Flower	Bodies	Proteobacteria	Gammaproteobacteria	Enterobacteriales	Enterobacteriaceae	Pantoea
1	ELD_056	ELD_039	ELD	Elegans	Wild	Flower	Bodies	Proteobacteria	Gammaproteobacteria	Enterobacteriales	Enterobacteriaceae	Pantoea
1	ELD_057	ELD_039	ELD	Elegans	Wild	Flower	Bodies	Proteobacteria	Gammaproteobacteria	Enterobacteriales	Enterobacteriaceae	Pantoea
1	ELD_058	ELD_039	ELD	Elegans	Wild	Flower	Bodies	Proteobacteria	Gammaproteobacteria	Enterobacteriales	Enterobacteriaceae	Pantoea
1	ELD_062	ELD_039	ELD	Elegans	Wild	Flower	Bodies	Proteobacteria	Gammaproteobacteria	Enterobacteriales	Enterobacteriaceae	Pantoea
1	ELD_063	ELD_039	ELD	Elegans	Wild	Flower	Bodies	Proteobacteria	Gammaproteobacteria	Enterobacteriales	Enterobacteriaceae	Pantoea
1	ELD_064	ELD_039	ELD	Elegans	Wild	Flower	Bodies	Proteobacteria	Gammaproteobacteria	Enterobacteriales	Enterobacteriaceae	Pantoea
1	ELD_067	ELD_039	ELD	Elegans	Wild	Flower	Bodies	Proteobacteria	Gammaproteobacteria	Enterobacteriales	Enterobacteriaceae	Pantoea
1	ELD_070	ELD_039	ELD	Elegans	Wild	Flower	Bodies	Proteobacteria	Gammaproteobacteria	Enterobacteriales	Enterobacteriaceae	Pantoea
1	ELD_071	ELD_039	ELD	Elegans	Wild	Flower	Bodies	Proteobacteria	Gammaproteobacteria	Enterobacteriales	Enterobacteriaceae	Pantoea
1	ELD_072	ELD_039	ELD	Elegans	Wild	Flower	Bodies	Proteobacteria	Gammaproteobacteria	Enterobacteriales	Enterobacteriaceae	Pantoea
1	ELD_073	ELD_039	ELD	Elegans	Wild	Flower	Bodies	Proteobacteria	Gammaproteobacteria	Enterobacteriales	Enterobacteriaceae	Pantoea
1	ELD_074	ELD_039	ELD	Elegans	Wild	Flower	Bodies	Proteobacteria	Gammaproteobacteria	Enterobacteriales	Enterobacteriaceae	Pantoea
1	ELD_075	ELD_039	ELD	Elegans	Wild	Flower	Bodies	Proteobacteria	Gammaproteobacteria	Enterobacteriales	Enterobacteriaceae	Pantoea
1	ELD_078	ELD_039	ELD	Elegans	Wild	Flower	Bodies	Proteobacteria	Gammaproteobacteria	Enterobacteriales	Enterobacteriaceae	Pantoea
1	ELD_080	ELD_039	ELD	Elegans	Wild	Flower	Bodies	Proteobacteria	Gammaproteobacteria	Enterobacteriales	Enterobacteriaceae	Pantoea
1	ELD_082	ELD_039	ELD	Elegans	Wild	Flower	Bodies	Proteobacteria	Gammaproteobacteria	Enterobacteriales	Enterobacteriaceae	Pantoea
1	ELD_089	ELD_039	ELD	Elegans	Wild	Flower	Bodies	Proteobacteria	Gammaproteobacteria	Enterobacteriales	Enterobacteriaceae	Pantoea
1	ELD_096	ELD_039	ELD	Elegans	Wild	Flower	Bodies	Proteobacteria	Gammaproteobacteria	Enterobacteriales	Enterobacteriaceae	Pantoea
1	ELA_024	IMH_035	ELA	Elegans	Wild	Flower	Bodies	Proteobacteria	Gammaproteobacteria	Enterobacteriales	Enterobacteriaceae	Pantoea
1	ELA_036	IMH_035	ELA	Elegans	Wild	Flower	Bodies	Proteobacteria	Gammaproteobacteria	Enterobacteriales	Enterobacteriaceae	Pantoea
1	ELA_038	IMH_035	ELA	Elegans	Wild	Flower	Bodies	Proteobacteria	Gammaproteobacteria	Enterobacteriales	Enterobacteriaceae	Pantoea
1	ELA_053	IMH_035	ELA	Elegans	Wild	Flower	Bodies	Proteobacteria	Gammaproteobacteria	Enterobacteriales	Enterobacteriaceae	Pantoea
1	ELA_066	IMH_035	ELA	Elegans	Wild	Flower	Bodies	Proteobacteria	Gammaproteobacteria	Enterobacteriales	Enterobacteriaceae	Pantoea
1	ELA_002	XDM_053	ELA	Elegans	Wild	Flower	Bodies	Proteobacteria	Gammaproteobacteria	Enterobacteriales	Enterobacteriaceae	Enterobacteriaceae Group Orbus
1	XYE_050	XDM_053	XYE	Elegans	Lab	Kopp	Guts	Proteobacteria	Gammaproteobacteria	Enterobacteriales	Enterobacteriaceae	Enterobacteriaceae Group Orbus
1	XYE_080	XDM_053	XYE	Elegans	Lab	Kopp	Guts	Proteobacteria	Gammaproteobacteria	Enterobacteriales	Enterobacteriaceae	Enterobacteriaceae Group Orbus
1	XYE_041	XDM_053	XYE	Elegans	Lab	Kopp	Guts	Proteobacteria	Gammaproteobacteria	Enterobacteriales	Enterobacteriaceae	Enterobacteriaceae Group Orbus
1	XYE_072	XDM_053	XYE	Elegans	Lab	Kopp	Guts	Proteobacteria	Gammaproteobacteria	Enterobacteriales	Enterobacteriaceae	Enterobacteriaceae Group Orbus
1	XYE_094	XDM_053	XYE	Elegans	Lab	Kopp	Guts	Proteobacteria	Gammaproteobacteria	Enterobacteriales	Enterobacteriaceae	Enterobacteriaceae Group Orbus
1	XYE_075	XDM_053	XYE	Elegans	Lab	Kopp	Guts	Proteobacteria	Gammaproteobacteria	Enterobacteriales	Enterobacteriaceae	Enterobacteriaceae Group Orbus
1	XYE_076	XDM_053	XYE	Elegans	Lab	Kopp	Guts	Proteobacteria	Gammaproteobacteria	Enterobacteriales	Enterobacteriaceae	Enterobacteriaceae Group Orbus
1	XYE_078	XDM_053	XYE	Elegans	Lab	Kopp	Guts	Proteobacteria	Gammaproteobacteria	Enterobacteriales	Enterobacteriaceae	Enterobacteriaceae Group Orbus
1	ELA_037	XDM_053	ELA	Elegans	Wild	Flower	Bodies	Proteobacteria	Gammaproteobacteria	Enterobacteriales	Enterobacteriaceae	Enterobacteriaceae Group Orbus
1	ELA_061	XDM_053	ELA	Elegans	Wild	Flower	Bodies	Proteobacteria	Gammaproteobacteria	Enterobacteriales	Enterobacteriaceae	Enterobacteriaceae Group Orbus
1	ELA_090	XDM_053	ELA	Elegans	Wild	Flower	Bodies	Proteobacteria	Gammaproteobacteria	Enterobacteriales	Enterobacteriaceae	Enterobacteriaceae Group Orbus
1	ELA_094	ELA_094	ELA	Elegans	Wild	Flower	Bodies	Firmicutes	Clostridia	Clostridiales	Lachnospiraceae	Unclassified_Lachnospiraceae
1	ELA_074	ELA_093	ELA	Elegans	Wild	Flower	Bodies	Firmicutes	Clostridia	Clostridiales	Lachnospiraceae	Unclassified_Lachnospiraceae
1	ELA_093	ELA_093	ELA	Elegans	Wild	Flower	Bodies	Firmicutes	Clostridia	Clostridiales	Lachnospiraceae	Unclassified_Lachnospiraceae
1	ELD_044	HPM_161	ELD	Elegans	Wild	Flower	Bodies	Firmicutes	Bacilli	Lactobacillales	Leuconostocaceae	Weissella
1	FNS_085	FNS_085	FNS	Falleni	Wild	Mushroom	Bodies	Proteobacteria	Betaproteobacteria	Burkholderiales	Alcaligenaceae	Alcaligenes
1	FNS_011	FNS_011	FNS	Falleni	Wild	Mushroom	Bodies	Proteobacteria	Deltaproteobacteria	Bdellovibrionales	Bacteriovoracaceae	Bacteriovorax
1	FNS_002	FNS_002	FNS	Falleni	Wild	Mushroom	Bodies	Firmicutes	Bacilli	Bacillales	Listeriaceae	Brochothrix
1	FNS_001	FNS_001	FNS	Falleni	Wild	Mushroom	Bodies	Proteobacteria	Gammaproteobacteria	Pseudomonadales	Pseudomonadaceae	Cellvibrio
1	FNS_089	FNS_089	FNS	Falleni	Wild	Mushroom	Bodies	Proteobacteria	Betaproteobacteria	Burkholderiales	Comamonadaceae	Comamonas
1	FNS_032	FNS_052	FNS	Falleni	Wild	Mushroom	Bodies	Proteobacteria	Betaproteobacteria	Burkholderiales	Comamonadaceae	Comamonas
1	FNS_052	FNS_052	FNS	Falleni	Wild	Mushroom	Bodies	Proteobacteria	Betaproteobacteria	Burkholderiales	Comamonadaceae	Comamonas
1	FNS_055	FNS_052	FNS	Falleni	Wild	Mushroom	Bodies	Proteobacteria	Betaproteobacteria	Burkholderiales	Comamonadaceae	Comamonas
1	FNS_087	FNS_052	FNS	Falleni	Wild	Mushroom	Bodies	Proteobacteria	Betaproteobacteria	Burkholderiales	Comamonadaceae	Comamonas
1	FNS_036	ELD_081	FNS	Falleni	Wild	Mushroom	Bodies	Proteobacteria	Betaproteobacteria	Burkholderiales	Comamonadaceae	Comamonas
1	FNS_095	ELD_081	FNS	Falleni	Wild	Mushroom	Bodies	Proteobacteria	Betaproteobacteria	Burkholderiales	Comamonadaceae	Comamonas
1	FNS_096	ELD_081	FNS	Falleni	Wild	Mushroom	Bodies	Proteobacteria	Betaproteobacteria	Burkholderiales	Comamonadaceae	Comamonas
1	FNS_028	FNS_028	FNS	Falleni	Wild	Mushroom	Bodies	Bacteroidetes	Bacteroidetes	Bacteroidales	Porphyromonadaceae	Dysgonomonas
1	FNS_062	FNS_062	FNS	Falleni	Wild	Mushroom	Bodies	Firmicutes	Bacilli	Lactobacillales	Enterococcaceae	Enterococcus
1	FNS_065	FNS_062	FNS	Falleni	Wild	Mushroom	Bodies	Firmicutes	Bacilli	Lactobacillales	Enterococcaceae	Enterococcus
1	FNS_019	MIC_001	FNS	Falleni	Wild	Mushroom	Bodies	Firmicutes	Bacilli	Lactobacillales	Enterococcaceae	Enterococcus
1	FNS_074	MIC_001	FNS	Falleni	Wild	Mushroom	Bodies	Firmicutes	Bacilli	Lactobacillales	Enterococcaceae	Enterococcus
1	FNS_071	FNS_071	FNS	Falleni	Wild	Mushroom	Bodies	Firmicutes	Erysipelotrichi	Erysipelotrichales	Erysipelotrichaceae	Erysipelothrix
1	FNS_008	FNS_090	FNS	Falleni	Wild	Mushroom	Bodies	Firmicutes	Bacilli	Bacillales	Planococcaceae	Kurthia
1	FNS_015	FNS_090	FNS	Falleni	Wild	Mushroom	Bodies	Firmicutes	Bacilli	Bacillales	Planococcaceae	Kurthia
1	FNS_051	FNS_090	FNS	Falleni	Wild	Mushroom	Bodies	Firmicutes	Bacilli	Bacillales	Planococcaceae	Kurthia
1	FNS_090	FNS_090	FNS	Falleni	Wild	Mushroom	Bodies	Firmicutes	Bacilli	Bacillales	Planococcaceae	Kurthia
1	FNS_004	SCA_160	FNS	Falleni	Wild	Mushroom	Bodies	Firmicutes	Bacilli	Lactobacillales	Streptococcaceae	Lactococcus
1	FNS_047	FNS_047	FNS	Falleni	Wild	Mushroom	Bodies	Actinobacteria	Actinobacteria	Actinomycetales	Microbacteriaceae	Leucobacter
1	FNS_016	FNS_060	FNS	Falleni	Wild	Mushroom	Bodies	Actinobacteria	Actinobacteria	Actinomycetales	Microbacteriaceae	Leucobacter
1	FNS_060	FNS_060	FNS	Falleni	Wild	Mushroom	Bodies	Actinobacteria	Actinobacteria	Actinomycetales	Microbacteriaceae	Leucobacter
1	FNS_063	FNS_060	FNS	Falleni	Wild	Mushroom	Bodies	Actinobacteria	Actinobacteria	Actinomycetales	Microbacteriaceae	Leucobacter
1	FNS_077	FNS_060	FNS	Falleni	Wild	Mushroom	Bodies	Actinobacteria	Actinobacteria	Actinomycetales	Microbacteriaceae	Leucobacter
1	FNS_033	FNS_033	FNS	Falleni	Wild	Mushroom	Bodies	Actinobacteria	Actinobacteria	Actinomycetales	Microbacteriaceae	Mycetocola
1	FNS_054	FNS_054	FNS	Falleni	Wild	Mushroom	Bodies	Firmicutes	Bacilli	Bacillales	Paenibacillaceae	PaeniPaenibacillus
1	FNS_018	XYM_085	FNS	Falleni	Wild	Mushroom	Bodies	Proteobacteria	Gammaproteobacteria	Enterobacteriales	Enterobacteriaceae	Providencia
1	FNS_050	XYM_085	FNS	Falleni	Wild	Mushroom	Bodies	Proteobacteria	Gammaproteobacteria	Enterobacteriales	Enterobacteriaceae	Providencia
1	FNS_073	FNS_073	FNS	Falleni	Wild	Mushroom	Bodies	Proteobacteria	Gammaproteobacteria	Pseudomonadales	Pseudomonadaceae	Pseudomonas
1	FNS_038	ELA_095	FNS	Falleni	Wild	Mushroom	Bodies	Proteobacteria	Gammaproteobacteria	Pseudomonadales	Pseudomonadaceae	Pseudomonas
1	FNS_009	FNS_009	FNS	Falleni	Wild	Mushroom	Bodies	Firmicutes	Bacilli	Bacillales	Staphylococcaceae	Staphylococcus
1	FNS_023	FNS_009	FNS	Falleni	Wild	Mushroom	Bodies	Firmicutes	Bacilli	Bacillales	Staphylococcaceae	Staphylococcus
1	FNS_037	FNS_009	FNS	Falleni	Wild	Mushroom	Bodies	Firmicutes	Bacilli	Bacillales	Staphylococcaceae	Staphylococcus
1	FNS_057	FNS_009	FNS	Falleni	Wild	Mushroom	Bodies	Firmicutes	Bacilli	Bacillales	Staphylococcaceae	Staphylococcus
1	FNS_058	FNS_009	FNS	Falleni	Wild	Mushroom	Bodies	Firmicutes	Bacilli	Bacillales	Staphylococcaceae	Staphylococcus
1	FNS_079	FNS_079	FNS	Falleni	Wild	Mushroom	Bodies	Firmicutes	Bacilli	Lactobacillales	Enterococcaceae	Vagococcus
1	FNS_022	FNS_092	FNS	Falleni	Wild	Mushroom	Bodies	Proteobacteria	Betaproteobacteria	Burkholderiales	Comamonadaceae	Unclassified_Comamonadaceae
1	FNS_092	FNS_092	FNS	Falleni	Wild	Mushroom	Bodies	Proteobacteria	Betaproteobacteria	Burkholderiales	Comamonadaceae	Unclassified_Comamonadaceae
1	FNS_026	FNS_026	FNS	Falleni	Wild	Mushroom	Bodies	Proteobacteria	Gammaproteobacteria	Enterobacteriales	Enterobacteriaceae	Unclassified_Enterobacteriaceae
1	FNS_069	HCF_011	FNS	Falleni	Wild	Mushroom	Bodies	Proteobacteria	Gammaproteobacteria	Unclassified_Gammaproteobacteria	Unclassified_Gammaproteobacteria	Unclassified_Gammaproteobacteria
1	FNS_075	HCF_011	FNS	Falleni	Wild	Mushroom	Bodies	Proteobacteria	Gammaproteobacteria	Unclassified_Gammaproteobacteria	Unclassified_Gammaproteobacteria	Unclassified_Gammaproteobacteria
1	FNS_084	HCF_011	FNS	Falleni	Wild	Mushroom	Bodies	Proteobacteria	Gammaproteobacteria	Unclassified_Gammaproteobacteria	Unclassified_Gammaproteobacteria	Unclassified_Gammaproteobacteria
1	FNS_014	HCF_018	FNS	Falleni	Wild	Mushroom	Bodies	Proteobacteria	Gammaproteobacteria	Enterobacteriales	Enterobacteriaceae	Enterobacteriaceae Group Orbus
1	FNS_003	FNS_003	FNS	Falleni	Wild	Mushroom	Bodies	Proteobacteria	Betaproteobacteria	Neisseriales	Neisseriaceae	Unclassified_Neisseriaceae
1	FNS_006	FNS_006	FNS	Falleni	Wild	Mushroom	Bodies	Firmicutes	Bacilli	Lactobacillales	Enterococcaceae	Vagococcus
1	FNS_007	FNS_006	FNS	Falleni	Wild	Mushroom	Bodies	Firmicutes	Bacilli	Lactobacillales	Enterococcaceae	Vagococcus
1	FNS_012	FNS_006	FNS	Falleni	Wild	Mushroom	Bodies	Firmicutes	Bacilli	Lactobacillales	Enterococcaceae	Vagococcus
1	FNS_030	FNS_006	FNS	Falleni	Wild	Mushroom	Bodies	Firmicutes	Bacilli	Lactobacillales	Enterococcaceae	Vagococcus
1	FNS_041	FNS_006	FNS	Falleni	Wild	Mushroom	Bodies	Firmicutes	Bacilli	Lactobacillales	Enterococcaceae	Vagococcus
1	FNS_042	FNS_006	FNS	Falleni	Wild	Mushroom	Bodies	Firmicutes	Bacilli	Lactobacillales	Enterococcaceae	Vagococcus
1	FNS_043	FNS_006	FNS	Falleni	Wild	Mushroom	Bodies	Firmicutes	Bacilli	Lactobacillales	Enterococcaceae	Vagococcus
1	FNS_049	FNS_006	FNS	Falleni	Wild	Mushroom	Bodies	Firmicutes	Bacilli	Lactobacillales	Enterococcaceae	Vagococcus
1	FNS_056	FNS_006	FNS	Falleni	Wild	Mushroom	Bodies	Firmicutes	Bacilli	Lactobacillales	Enterococcaceae	Vagococcus
1	FNS_059	FNS_006	FNS	Falleni	Wild	Mushroom	Bodies	Firmicutes	Bacilli	Lactobacillales	Enterococcaceae	Vagococcus
1	FNS_066	FNS_006	FNS	Falleni	Wild	Mushroom	Bodies	Firmicutes	Bacilli	Lactobacillales	Enterococcaceae	Vagococcus
1	FNS_072	FNS_006	FNS	Falleni	Wild	Mushroom	Bodies	Firmicutes	Bacilli	Lactobacillales	Enterococcaceae	Vagococcus
1	FNS_081	FNS_006	FNS	Falleni	Wild	Mushroom	Bodies	Firmicutes	Bacilli	Lactobacillales	Enterococcaceae	Vagococcus
1	FNS_082	FNS_006	FNS	Falleni	Wild	Mushroom	Bodies	Firmicutes	Bacilli	Lactobacillales	Enterococcaceae	Vagococcus
1	FNS_035	FNS_035	FNS	Falleni	Wild	Mushroom	Bodies	Firmicutes	Bacilli	Lactobacillales	Enterococcaceae	Vagococcus
1	FNS_061	FNS_035	FNS	Falleni	Wild	Mushroom	Bodies	Firmicutes	Bacilli	Lactobacillales	Enterococcaceae	Vagococcus
1	FNS_088	FNS_035	FNS	Falleni	Wild	Mushroom	Bodies	Firmicutes	Bacilli	Lactobacillales	Enterococcaceae	Vagococcus
1	FNS_017	FNS_017	FNS	Falleni	Wild	Mushroom	Bodies	Firmicutes	Bacilli	Lactobacillales	Enterococcaceae	Vagococcus
1	FNS_024	FNS_017	FNS	Falleni	Wild	Mushroom	Bodies	Firmicutes	Bacilli	Lactobacillales	Enterococcaceae	Vagococcus
1	FNS_045	FNS_017	FNS	Falleni	Wild	Mushroom	Bodies	Firmicutes	Bacilli	Lactobacillales	Enterococcaceae	Vagococcus
1	FNS_076	FNS_017	FNS	Falleni	Wild	Mushroom	Bodies	Firmicutes	Bacilli	Lactobacillales	Enterococcaceae	Vagococcus
1	FLV_080	FLV_080	FLV	Flavohirta	Wild	Flower	Bodies	Bacteroidetes	Bacteroidetes	Bacteroidales	Porphyromonadaceae	Dysgonomonas
1	FLV_009	XYX_081	FLV	Flavohirta	Wild	Flower	Bodies	Proteobacteria	Gammaproteobacteria	Enterobacteriales	Enterobacteriaceae	Serratia
1	FLV_017	XYX_081	FLV	Flavohirta	Wild	Flower	Bodies	Proteobacteria	Gammaproteobacteria	Enterobacteriales	Enterobacteriaceae	Serratia
1	FLV_018	XYX_081	FLV	Flavohirta	Wild	Flower	Bodies	Proteobacteria	Gammaproteobacteria	Enterobacteriales	Enterobacteriaceae	Serratia
1	FLV_026	XYX_081	FLV	Flavohirta	Wild	Flower	Bodies	Proteobacteria	Gammaproteobacteria	Enterobacteriales	Enterobacteriaceae	Serratia
1	FLV_028	XYX_081	FLV	Flavohirta	Wild	Flower	Bodies	Proteobacteria	Gammaproteobacteria	Enterobacteriales	Enterobacteriaceae	Serratia
1	FLV_033	XYX_081	FLV	Flavohirta	Wild	Flower	Bodies	Proteobacteria	Gammaproteobacteria	Enterobacteriales	Enterobacteriaceae	Serratia
1	FLV_035	XYX_081	FLV	Flavohirta	Wild	Flower	Bodies	Proteobacteria	Gammaproteobacteria	Enterobacteriales	Enterobacteriaceae	Serratia
1	FLV_037	XYX_081	FLV	Flavohirta	Wild	Flower	Bodies	Proteobacteria	Gammaproteobacteria	Enterobacteriales	Enterobacteriaceae	Serratia
1	FLV_038	XYX_081	FLV	Flavohirta	Wild	Flower	Bodies	Proteobacteria	Gammaproteobacteria	Enterobacteriales	Enterobacteriaceae	Serratia
1	FLV_045	XYX_081	FLV	Flavohirta	Wild	Flower	Bodies	Proteobacteria	Gammaproteobacteria	Enterobacteriales	Enterobacteriaceae	Serratia
1	FLV_050	XYX_081	FLV	Flavohirta	Wild	Flower	Bodies	Proteobacteria	Gammaproteobacteria	Enterobacteriales	Enterobacteriaceae	Serratia
1	FLV_052	XYX_081	FLV	Flavohirta	Wild	Flower	Bodies	Proteobacteria	Gammaproteobacteria	Enterobacteriales	Enterobacteriaceae	Serratia
1	FLV_058	XYX_081	FLV	Flavohirta	Wild	Flower	Bodies	Proteobacteria	Gammaproteobacteria	Enterobacteriales	Enterobacteriaceae	Serratia
1	FLV_063	XYX_081	FLV	Flavohirta	Wild	Flower	Bodies	Proteobacteria	Gammaproteobacteria	Enterobacteriales	Enterobacteriaceae	Serratia
1	FLV_066	XYX_081	FLV	Flavohirta	Wild	Flower	Bodies	Proteobacteria	Gammaproteobacteria	Enterobacteriales	Enterobacteriaceae	Serratia
1	FLV_071	XYX_081	FLV	Flavohirta	Wild	Flower	Bodies	Proteobacteria	Gammaproteobacteria	Enterobacteriales	Enterobacteriaceae	Serratia
1	FLV_081	XYX_081	FLV	Flavohirta	Wild	Flower	Bodies	Proteobacteria	Gammaproteobacteria	Enterobacteriales	Enterobacteriaceae	Serratia
1	FLV_084	XYX_081	FLV	Flavohirta	Wild	Flower	Bodies	Proteobacteria	Gammaproteobacteria	Enterobacteriales	Enterobacteriaceae	Serratia
1	FLV_085	XYX_081	FLV	Flavohirta	Wild	Flower	Bodies	Proteobacteria	Gammaproteobacteria	Enterobacteriales	Enterobacteriaceae	Serratia
1	FLV_094	XYX_081	FLV	Flavohirta	Wild	Flower	Bodies	Proteobacteria	Gammaproteobacteria	Enterobacteriales	Enterobacteriaceae	Serratia
1	FLV_095	XYX_081	FLV	Flavohirta	Wild	Flower	Bodies	Proteobacteria	Gammaproteobacteria	Enterobacteriales	Enterobacteriaceae	Serratia
1	FLV_012	TKM_092	FLV	Flavohirta	Wild	Flower	Bodies	Proteobacteria	Alphaproteobacteria	Rhodospirillales	Acetobacteraceae	Commensalibacter
1	FLV_032	FLV_040	FLV	Flavohirta	Wild	Flower	Bodies	Proteobacteria	Alphaproteobacteria	Unclassified_Alphaproteobacteria	Unclassified_Alphaproteobacteria	Unclassified_Alphaproteobacteria
1	FLV_040	FLV_040	FLV	Flavohirta	Wild	Flower	Bodies	Proteobacteria	Alphaproteobacteria	Unclassified_Alphaproteobacteria	Unclassified_Alphaproteobacteria	Unclassified_Alphaproteobacteria
1	FLV_077	FLV_077	FLV	Flavohirta	Wild	Flower	Bodies	Proteobacteria	Gammaproteobacteria	Enterobacteriales	Enterobacteriaceae	Erwinia
1	FLV_082	FLV_082	FLV	Flavohirta	Wild	Flower	Bodies	Proteobacteria	Gammaproteobacteria	Enterobacteriales	Enterobacteriaceae	Enterobacteriaceae Group Orbus
1	FLV_089	FLV_089	FLV	Flavohirta	Wild	Flower	Bodies	Proteobacteria	Gammaproteobacteria	Enterobacteriales	Enterobacteriaceae	Serratia
1	FLV_005	FLV_010	FLV	Flavohirta	Wild	Flower	Bodies	Proteobacteria	Gammaproteobacteria	Enterobacteriales	Enterobacteriaceae	Erwinia
1	FLV_010	FLV_010	FLV	Flavohirta	Wild	Flower	Bodies	Proteobacteria	Gammaproteobacteria	Enterobacteriales	Enterobacteriaceae	Erwinia
1	FLV_011	FLV_010	FLV	Flavohirta	Wild	Flower	Bodies	Proteobacteria	Gammaproteobacteria	Enterobacteriales	Enterobacteriaceae	Erwinia
1	FLV_047	FLV_010	FLV	Flavohirta	Wild	Flower	Bodies	Proteobacteria	Gammaproteobacteria	Enterobacteriales	Enterobacteriaceae	Erwinia
1	FLV_065	FLV_010	FLV	Flavohirta	Wild	Flower	Bodies	Proteobacteria	Gammaproteobacteria	Enterobacteriales	Enterobacteriaceae	Erwinia
1	FLV_067	FLV_010	FLV	Flavohirta	Wild	Flower	Bodies	Proteobacteria	Gammaproteobacteria	Enterobacteriales	Enterobacteriaceae	Erwinia
1	FLV_069	FLV_010	FLV	Flavohirta	Wild	Flower	Bodies	Proteobacteria	Gammaproteobacteria	Enterobacteriales	Enterobacteriaceae	Erwinia
1	FLV_072	FLV_010	FLV	Flavohirta	Wild	Flower	Bodies	Proteobacteria	Gammaproteobacteria	Enterobacteriales	Enterobacteriaceae	Erwinia
1	FLV_074	FLV_010	FLV	Flavohirta	Wild	Flower	Bodies	Proteobacteria	Gammaproteobacteria	Enterobacteriales	Enterobacteriaceae	Erwinia
1	FLV_086	FLV_010	FLV	Flavohirta	Wild	Flower	Bodies	Proteobacteria	Gammaproteobacteria	Enterobacteriales	Enterobacteriaceae	Erwinia
1	FLV_087	FLV_010	FLV	Flavohirta	Wild	Flower	Bodies	Proteobacteria	Gammaproteobacteria	Enterobacteriales	Enterobacteriaceae	Erwinia
1	FLV_093	FLV_010	FLV	Flavohirta	Wild	Flower	Bodies	Proteobacteria	Gammaproteobacteria	Enterobacteriales	Enterobacteriaceae	Erwinia
1	FLV_001	FLV_092	FLV	Flavohirta	Wild	Flower	Bodies	Proteobacteria	Gammaproteobacteria	Enterobacteriales	Enterobacteriaceae	Enterobacteriaceae Group Orbus
1	FLV_002	FLV_092	FLV	Flavohirta	Wild	Flower	Bodies	Proteobacteria	Gammaproteobacteria	Enterobacteriales	Enterobacteriaceae	Enterobacteriaceae Group Orbus
1	FLV_015	FLV_092	FLV	Flavohirta	Wild	Flower	Bodies	Proteobacteria	Gammaproteobacteria	Enterobacteriales	Enterobacteriaceae	Enterobacteriaceae Group Orbus
1	FLV_016	FLV_092	FLV	Flavohirta	Wild	Flower	Bodies	Proteobacteria	Gammaproteobacteria	Enterobacteriales	Enterobacteriaceae	Enterobacteriaceae Group Orbus
1	FLV_022	FLV_092	FLV	Flavohirta	Wild	Flower	Bodies	Proteobacteria	Gammaproteobacteria	Enterobacteriales	Enterobacteriaceae	Enterobacteriaceae Group Orbus
1	FLV_024	FLV_092	FLV	Flavohirta	Wild	Flower	Bodies	Proteobacteria	Gammaproteobacteria	Enterobacteriales	Enterobacteriaceae	Enterobacteriaceae Group Orbus
1	FLV_027	FLV_092	FLV	Flavohirta	Wild	Flower	Bodies	Proteobacteria	Gammaproteobacteria	Enterobacteriales	Enterobacteriaceae	Enterobacteriaceae Group Orbus
1	FLV_034	FLV_092	FLV	Flavohirta	Wild	Flower	Bodies	Proteobacteria	Gammaproteobacteria	Enterobacteriales	Enterobacteriaceae	Enterobacteriaceae Group Orbus
1	FLV_041	FLV_092	FLV	Flavohirta	Wild	Flower	Bodies	Proteobacteria	Gammaproteobacteria	Enterobacteriales	Enterobacteriaceae	Enterobacteriaceae Group Orbus
1	FLV_042	FLV_092	FLV	Flavohirta	Wild	Flower	Bodies	Proteobacteria	Gammaproteobacteria	Enterobacteriales	Enterobacteriaceae	Enterobacteriaceae Group Orbus
1	FLV_046	FLV_092	FLV	Flavohirta	Wild	Flower	Bodies	Proteobacteria	Gammaproteobacteria	Enterobacteriales	Enterobacteriaceae	Enterobacteriaceae Group Orbus
1	FLV_057	FLV_092	FLV	Flavohirta	Wild	Flower	Bodies	Proteobacteria	Gammaproteobacteria	Enterobacteriales	Enterobacteriaceae	Enterobacteriaceae Group Orbus
1	FLV_059	FLV_092	FLV	Flavohirta	Wild	Flower	Bodies	Proteobacteria	Gammaproteobacteria	Enterobacteriales	Enterobacteriaceae	Enterobacteriaceae Group Orbus
1	FLV_060	FLV_092	FLV	Flavohirta	Wild	Flower	Bodies	Proteobacteria	Gammaproteobacteria	Enterobacteriales	Enterobacteriaceae	Enterobacteriaceae Group Orbus
1	FLV_064	FLV_092	FLV	Flavohirta	Wild	Flower	Bodies	Proteobacteria	Gammaproteobacteria	Enterobacteriales	Enterobacteriaceae	Enterobacteriaceae Group Orbus
1	FLV_073	FLV_092	FLV	Flavohirta	Wild	Flower	Bodies	Proteobacteria	Gammaproteobacteria	Enterobacteriales	Enterobacteriaceae	Enterobacteriaceae Group Orbus
1	FLV_076	FLV_092	FLV	Flavohirta	Wild	Flower	Bodies	Proteobacteria	Gammaproteobacteria	Enterobacteriales	Enterobacteriaceae	Enterobacteriaceae Group Orbus
1	FLV_088	FLV_092	FLV	Flavohirta	Wild	Flower	Bodies	Proteobacteria	Gammaproteobacteria	Enterobacteriales	Enterobacteriaceae	Enterobacteriaceae Group Orbus
1	FLV_092	FLV_092	FLV	Flavohirta	Wild	Flower	Bodies	Proteobacteria	Gammaproteobacteria	Enterobacteriales	Enterobacteriaceae	Enterobacteriaceae Group Orbus
1	FLV_014	XDM_053	FLV	Flavohirta	Wild	Flower	Bodies	Proteobacteria	Gammaproteobacteria	Enterobacteriales	Enterobacteriaceae	Enterobacteriaceae Group Orbus
1	FLV_013	FLV_013	FLV	Flavohirta	Wild	Flower	Bodies	Firmicutes	Clostridia	Clostridiales	Ruminococcaceae	Unclassified_Ruminococcaceae
1	FLV_036	FLV_013	FLV	Flavohirta	Wild	Flower	Bodies	Firmicutes	Clostridia	Clostridiales	Ruminococcaceae	Unclassified_Ruminococcaceae
1	FLV_083	FLV_013	FLV	Flavohirta	Wild	Flower	Bodies	Firmicutes	Clostridia	Clostridiales	Ruminococcaceae	Unclassified_Ruminococcaceae
1	HPM_154	MAW_008	HPM	Hydei	Wild	Fruit	Guts	Proteobacteria	Alphaproteobacteria	Rhodospirillales	Acetobacteraceae	Acetobacter
1	HPM_203	HPM_203	HPM	Hydei	Wild	Fruit	Guts	Bacteroidetes	Bacteroidetes	Bacteroidales	Porphyromonadaceae	Dysgonomonas
1	HCF_006	HCF_053	HCF	Hydei	Wild	Fruit	Guts	Bacteroidetes	Bacteroidetes	Bacteroidales	Porphyromonadaceae	Dysgonomonas
1	HCF_053	HCF_053	HCF	Hydei	Wild	Fruit	Guts	Bacteroidetes	Bacteroidetes	Bacteroidales	Porphyromonadaceae	Dysgonomonas
1	HCF_075	HCF_053	HCF	Hydei	Wild	Fruit	Guts	Bacteroidetes	Bacteroidetes	Bacteroidales	Porphyromonadaceae	Dysgonomonas
1	HPP_054	FNS_062	HPP	Hydei	Wild	Fruit	Guts	Firmicutes	Bacilli	Lactobacillales	Enterococcaceae	Enterococcus
1	HPM_217	MIC_001	HPM	Hydei	Wild	Fruit	Guts	Firmicutes	Bacilli	Lactobacillales	Enterococcaceae	Enterococcus
1	HPM_169	TBB_129	HPM	Hydei	Wild	Fruit	Guts	Proteobacteria	Alphaproteobacteria	Rhodospirillales	Acetobacteraceae	Gluconobacter
1	HPM_053	WOG_027	HPM	Hydei	Wild	Fruit	Guts	Firmicutes	Bacilli	Lactobacillales	Lactobacillaceae	Lactobacillus
1	HPM_131	HPM_219	HPM	Hydei	Wild	Fruit	Guts	Firmicutes	Bacilli	Lactobacillales	Leuconostocaceae	Leuconostoc
1	HPM_152	HPM_219	HPM	Hydei	Wild	Fruit	Guts	Firmicutes	Bacilli	Lactobacillales	Leuconostocaceae	Leuconostoc
1	HPM_153	HPM_219	HPM	Hydei	Wild	Fruit	Guts	Firmicutes	Bacilli	Lactobacillales	Leuconostocaceae	Leuconostoc
1	HPM_177	HPM_219	HPM	Hydei	Wild	Fruit	Guts	Firmicutes	Bacilli	Lactobacillales	Leuconostocaceae	Leuconostoc
1	HPM_202	HPM_219	HPM	Hydei	Wild	Fruit	Guts	Firmicutes	Bacilli	Lactobacillales	Leuconostocaceae	Leuconostoc
1	HPM_219	HPM_219	HPM	Hydei	Wild	Fruit	Guts	Firmicutes	Bacilli	Lactobacillales	Leuconostocaceae	Leuconostoc
1	HPM_129	HPM_129	HPM	Hydei	Wild	Fruit	Guts	Firmicutes	Bacilli	Lactobacillales	Leuconostocaceae	Leuconostoc
1	HPM_162	HPM_129	HPM	Hydei	Wild	Fruit	Guts	Firmicutes	Bacilli	Lactobacillales	Leuconostocaceae	Leuconostoc
1	HPM_200	HPM_129	HPM	Hydei	Wild	Fruit	Guts	Firmicutes	Bacilli	Lactobacillales	Leuconostocaceae	Leuconostoc
1	HPM_209	HPM_129	HPM	Hydei	Wild	Fruit	Guts	Firmicutes	Bacilli	Lactobacillales	Leuconostocaceae	Leuconostoc
1	HPM_216	HPM_129	HPM	Hydei	Wild	Fruit	Guts	Firmicutes	Bacilli	Lactobacillales	Leuconostocaceae	Leuconostoc
1	HPM_098	XYM_085	HPM	Hydei	Wild	Fruit	Guts	Proteobacteria	Gammaproteobacteria	Enterobacteriales	Enterobacteriaceae	Providencia
1	HPM_181	HPM_181	HPM	Hydei	Wild	Fruit	Guts	Proteobacteria	Betaproteobacteria	Burkholderiales	Alcaligenaceae	Unclassified_Alcaligenaceae
1	HPM_143	HPM_143	HPM	Hydei	Wild	Fruit	Guts	Proteobacteria	Gammaproteobacteria	Enterobacteriales	Enterobacteriaceae	Unclassified_Enterobacteriaceae
1	HPM_069	HPM_069	HPM	Hydei	Wild	Fruit	Guts	Proteobacteria	Gammaproteobacteria	Enterobacteriales	Enterobacteriaceae	Enterobacteriaceae Group Orbus
1	HCF_011	HCF_011	HCF	Hydei	Wild	Fruit	Guts	Proteobacteria	Gammaproteobacteria	Unclassified_Gammaproteobacteria	Unclassified_Gammaproteobacteria	Unclassified_Gammaproteobacteria
1	HCF_030	HCF_011	HCF	Hydei	Wild	Fruit	Guts	Proteobacteria	Gammaproteobacteria	Unclassified_Gammaproteobacteria	Unclassified_Gammaproteobacteria	Unclassified_Gammaproteobacteria
1	HPM_167	HCF_011	HPM	Hydei	Wild	Fruit	Guts	Proteobacteria	Gammaproteobacteria	Unclassified_Gammaproteobacteria	Unclassified_Gammaproteobacteria	Unclassified_Gammaproteobacteria
1	HCF_001	HCF_018	HCF	Hydei	Wild	Fruit	Guts	Proteobacteria	Gammaproteobacteria	Enterobacteriales	Enterobacteriaceae	Enterobacteriaceae Group Orbus
1	HCF_002	HCF_018	HCF	Hydei	Wild	Fruit	Guts	Proteobacteria	Gammaproteobacteria	Enterobacteriales	Enterobacteriaceae	Enterobacteriaceae Group Orbus
1	HCF_003	HCF_018	HCF	Hydei	Wild	Fruit	Guts	Proteobacteria	Gammaproteobacteria	Enterobacteriales	Enterobacteriaceae	Enterobacteriaceae Group Orbus
1	HCF_004	HCF_018	HCF	Hydei	Wild	Fruit	Guts	Proteobacteria	Gammaproteobacteria	Enterobacteriales	Enterobacteriaceae	Enterobacteriaceae Group Orbus
1	HCF_007	HCF_018	HCF	Hydei	Wild	Fruit	Guts	Proteobacteria	Gammaproteobacteria	Enterobacteriales	Enterobacteriaceae	Enterobacteriaceae Group Orbus
1	HCF_008	HCF_018	HCF	Hydei	Wild	Fruit	Guts	Proteobacteria	Gammaproteobacteria	Enterobacteriales	Enterobacteriaceae	Enterobacteriaceae Group Orbus
1	HCF_009	HCF_018	HCF	Hydei	Wild	Fruit	Guts	Proteobacteria	Gammaproteobacteria	Enterobacteriales	Enterobacteriaceae	Enterobacteriaceae Group Orbus
1	HCF_010	HCF_018	HCF	Hydei	Wild	Fruit	Guts	Proteobacteria	Gammaproteobacteria	Enterobacteriales	Enterobacteriaceae	Enterobacteriaceae Group Orbus
1	HCF_012	HCF_018	HCF	Hydei	Wild	Fruit	Guts	Proteobacteria	Gammaproteobacteria	Enterobacteriales	Enterobacteriaceae	Enterobacteriaceae Group Orbus
1	HCF_013	HCF_018	HCF	Hydei	Wild	Fruit	Guts	Proteobacteria	Gammaproteobacteria	Enterobacteriales	Enterobacteriaceae	Enterobacteriaceae Group Orbus
1	HCF_014	HCF_018	HCF	Hydei	Wild	Fruit	Guts	Proteobacteria	Gammaproteobacteria	Enterobacteriales	Enterobacteriaceae	Enterobacteriaceae Group Orbus
1	HCF_015	HCF_018	HCF	Hydei	Wild	Fruit	Guts	Proteobacteria	Gammaproteobacteria	Enterobacteriales	Enterobacteriaceae	Enterobacteriaceae Group Orbus
1	HCF_018	HCF_018	HCF	Hydei	Wild	Fruit	Guts	Proteobacteria	Gammaproteobacteria	Enterobacteriales	Enterobacteriaceae	Enterobacteriaceae Group Orbus
1	HCF_019	HCF_018	HCF	Hydei	Wild	Fruit	Guts	Proteobacteria	Gammaproteobacteria	Enterobacteriales	Enterobacteriaceae	Enterobacteriaceae Group Orbus
1	HCF_022	HCF_018	HCF	Hydei	Wild	Fruit	Guts	Proteobacteria	Gammaproteobacteria	Enterobacteriales	Enterobacteriaceae	Enterobacteriaceae Group Orbus
1	HCF_023	HCF_018	HCF	Hydei	Wild	Fruit	Guts	Proteobacteria	Gammaproteobacteria	Enterobacteriales	Enterobacteriaceae	Enterobacteriaceae Group Orbus
1	HCF_024	HCF_018	HCF	Hydei	Wild	Fruit	Guts	Proteobacteria	Gammaproteobacteria	Enterobacteriales	Enterobacteriaceae	Enterobacteriaceae Group Orbus
1	HCF_026	HCF_018	HCF	Hydei	Wild	Fruit	Guts	Proteobacteria	Gammaproteobacteria	Enterobacteriales	Enterobacteriaceae	Enterobacteriaceae Group Orbus
1	HCF_027	HCF_018	HCF	Hydei	Wild	Fruit	Guts	Proteobacteria	Gammaproteobacteria	Enterobacteriales	Enterobacteriaceae	Enterobacteriaceae Group Orbus
1	HCF_028	HCF_018	HCF	Hydei	Wild	Fruit	Guts	Proteobacteria	Gammaproteobacteria	Enterobacteriales	Enterobacteriaceae	Enterobacteriaceae Group Orbus
1	HCF_029	HCF_018	HCF	Hydei	Wild	Fruit	Guts	Proteobacteria	Gammaproteobacteria	Enterobacteriales	Enterobacteriaceae	Enterobacteriaceae Group Orbus
1	HCF_031	HCF_018	HCF	Hydei	Wild	Fruit	Guts	Proteobacteria	Gammaproteobacteria	Enterobacteriales	Enterobacteriaceae	Enterobacteriaceae Group Orbus
1	HCF_032	HCF_018	HCF	Hydei	Wild	Fruit	Guts	Proteobacteria	Gammaproteobacteria	Enterobacteriales	Enterobacteriaceae	Enterobacteriaceae Group Orbus
1	HCF_033	HCF_018	HCF	Hydei	Wild	Fruit	Guts	Proteobacteria	Gammaproteobacteria	Enterobacteriales	Enterobacteriaceae	Enterobacteriaceae Group Orbus
1	HCF_034	HCF_018	HCF	Hydei	Wild	Fruit	Guts	Proteobacteria	Gammaproteobacteria	Enterobacteriales	Enterobacteriaceae	Enterobacteriaceae Group Orbus
1	HCF_036	HCF_018	HCF	Hydei	Wild	Fruit	Guts	Proteobacteria	Gammaproteobacteria	Enterobacteriales	Enterobacteriaceae	Enterobacteriaceae Group Orbus
1	HCF_037	HCF_018	HCF	Hydei	Wild	Fruit	Guts	Proteobacteria	Gammaproteobacteria	Enterobacteriales	Enterobacteriaceae	Enterobacteriaceae Group Orbus
1	HCF_038	HCF_018	HCF	Hydei	Wild	Fruit	Guts	Proteobacteria	Gammaproteobacteria	Enterobacteriales	Enterobacteriaceae	Enterobacteriaceae Group Orbus
1	HCF_039	HCF_018	HCF	Hydei	Wild	Fruit	Guts	Proteobacteria	Gammaproteobacteria	Enterobacteriales	Enterobacteriaceae	Enterobacteriaceae Group Orbus
1	HCF_040	HCF_018	HCF	Hydei	Wild	Fruit	Guts	Proteobacteria	Gammaproteobacteria	Enterobacteriales	Enterobacteriaceae	Enterobacteriaceae Group Orbus
1	HCF_041	HCF_018	HCF	Hydei	Wild	Fruit	Guts	Proteobacteria	Gammaproteobacteria	Enterobacteriales	Enterobacteriaceae	Enterobacteriaceae Group Orbus
1	HCF_042	HCF_018	HCF	Hydei	Wild	Fruit	Guts	Proteobacteria	Gammaproteobacteria	Enterobacteriales	Enterobacteriaceae	Enterobacteriaceae Group Orbus
1	HCF_045	HCF_018	HCF	Hydei	Wild	Fruit	Guts	Proteobacteria	Gammaproteobacteria	Enterobacteriales	Enterobacteriaceae	Enterobacteriaceae Group Orbus
1	HCF_047	HCF_018	HCF	Hydei	Wild	Fruit	Guts	Proteobacteria	Gammaproteobacteria	Enterobacteriales	Enterobacteriaceae	Enterobacteriaceae Group Orbus
1	HCF_049	HCF_018	HCF	Hydei	Wild	Fruit	Guts	Proteobacteria	Gammaproteobacteria	Enterobacteriales	Enterobacteriaceae	Enterobacteriaceae Group Orbus
1	HCF_050	HCF_018	HCF	Hydei	Wild	Fruit	Guts	Proteobacteria	Gammaproteobacteria	Enterobacteriales	Enterobacteriaceae	Enterobacteriaceae Group Orbus
1	HCF_051	HCF_018	HCF	Hydei	Wild	Fruit	Guts	Proteobacteria	Gammaproteobacteria	Enterobacteriales	Enterobacteriaceae	Enterobacteriaceae Group Orbus
1	HCF_054	HCF_018	HCF	Hydei	Wild	Fruit	Guts	Proteobacteria	Gammaproteobacteria	Enterobacteriales	Enterobacteriaceae	Enterobacteriaceae Group Orbus
1	HCF_055	HCF_018	HCF	Hydei	Wild	Fruit	Guts	Proteobacteria	Gammaproteobacteria	Enterobacteriales	Enterobacteriaceae	Enterobacteriaceae Group Orbus
1	HCF_056	HCF_018	HCF	Hydei	Wild	Fruit	Guts	Proteobacteria	Gammaproteobacteria	Enterobacteriales	Enterobacteriaceae	Enterobacteriaceae Group Orbus
1	HCF_059	HCF_018	HCF	Hydei	Wild	Fruit	Guts	Proteobacteria	Gammaproteobacteria	Enterobacteriales	Enterobacteriaceae	Enterobacteriaceae Group Orbus
1	HCF_060	HCF_018	HCF	Hydei	Wild	Fruit	Guts	Proteobacteria	Gammaproteobacteria	Enterobacteriales	Enterobacteriaceae	Enterobacteriaceae Group Orbus
1	HCF_061	HCF_018	HCF	Hydei	Wild	Fruit	Guts	Proteobacteria	Gammaproteobacteria	Enterobacteriales	Enterobacteriaceae	Enterobacteriaceae Group Orbus
1	HCF_063	HCF_018	HCF	Hydei	Wild	Fruit	Guts	Proteobacteria	Gammaproteobacteria	Enterobacteriales	Enterobacteriaceae	Enterobacteriaceae Group Orbus
1	HCF_065	HCF_018	HCF	Hydei	Wild	Fruit	Guts	Proteobacteria	Gammaproteobacteria	Enterobacteriales	Enterobacteriaceae	Enterobacteriaceae Group Orbus
1	HCF_066	HCF_018	HCF	Hydei	Wild	Fruit	Guts	Proteobacteria	Gammaproteobacteria	Enterobacteriales	Enterobacteriaceae	Enterobacteriaceae Group Orbus
1	HCF_067	HCF_018	HCF	Hydei	Wild	Fruit	Guts	Proteobacteria	Gammaproteobacteria	Enterobacteriales	Enterobacteriaceae	Enterobacteriaceae Group Orbus
1	HCF_068	HCF_018	HCF	Hydei	Wild	Fruit	Guts	Proteobacteria	Gammaproteobacteria	Enterobacteriales	Enterobacteriaceae	Enterobacteriaceae Group Orbus
1	HCF_069	HCF_018	HCF	Hydei	Wild	Fruit	Guts	Proteobacteria	Gammaproteobacteria	Enterobacteriales	Enterobacteriaceae	Enterobacteriaceae Group Orbus
1	HCF_070	HCF_018	HCF	Hydei	Wild	Fruit	Guts	Proteobacteria	Gammaproteobacteria	Enterobacteriales	Enterobacteriaceae	Enterobacteriaceae Group Orbus
1	HCF_071	HCF_018	HCF	Hydei	Wild	Fruit	Guts	Proteobacteria	Gammaproteobacteria	Enterobacteriales	Enterobacteriaceae	Enterobacteriaceae Group Orbus
1	HCF_072	HCF_018	HCF	Hydei	Wild	Fruit	Guts	Proteobacteria	Gammaproteobacteria	Enterobacteriales	Enterobacteriaceae	Enterobacteriaceae Group Orbus
1	HCF_073	HCF_018	HCF	Hydei	Wild	Fruit	Guts	Proteobacteria	Gammaproteobacteria	Enterobacteriales	Enterobacteriaceae	Enterobacteriaceae Group Orbus
1	HCF_074	HCF_018	HCF	Hydei	Wild	Fruit	Guts	Proteobacteria	Gammaproteobacteria	Enterobacteriales	Enterobacteriaceae	Enterobacteriaceae Group Orbus
1	HCF_076	HCF_018	HCF	Hydei	Wild	Fruit	Guts	Proteobacteria	Gammaproteobacteria	Enterobacteriales	Enterobacteriaceae	Enterobacteriaceae Group Orbus
1	HCF_077	HCF_018	HCF	Hydei	Wild	Fruit	Guts	Proteobacteria	Gammaproteobacteria	Enterobacteriales	Enterobacteriaceae	Enterobacteriaceae Group Orbus
1	HCF_078	HCF_018	HCF	Hydei	Wild	Fruit	Guts	Proteobacteria	Gammaproteobacteria	Enterobacteriales	Enterobacteriaceae	Enterobacteriaceae Group Orbus
1	HCF_079	HCF_018	HCF	Hydei	Wild	Fruit	Guts	Proteobacteria	Gammaproteobacteria	Enterobacteriales	Enterobacteriaceae	Enterobacteriaceae Group Orbus
1	HCF_080	HCF_018	HCF	Hydei	Wild	Fruit	Guts	Proteobacteria	Gammaproteobacteria	Enterobacteriales	Enterobacteriaceae	Enterobacteriaceae Group Orbus
1	HCF_081	HCF_018	HCF	Hydei	Wild	Fruit	Guts	Proteobacteria	Gammaproteobacteria	Enterobacteriales	Enterobacteriaceae	Enterobacteriaceae Group Orbus
1	HCF_082	HCF_018	HCF	Hydei	Wild	Fruit	Guts	Proteobacteria	Gammaproteobacteria	Enterobacteriales	Enterobacteriaceae	Enterobacteriaceae Group Orbus
1	HCF_083	HCF_018	HCF	Hydei	Wild	Fruit	Guts	Proteobacteria	Gammaproteobacteria	Enterobacteriales	Enterobacteriaceae	Enterobacteriaceae Group Orbus
1	HCF_084	HCF_018	HCF	Hydei	Wild	Fruit	Guts	Proteobacteria	Gammaproteobacteria	Enterobacteriales	Enterobacteriaceae	Enterobacteriaceae Group Orbus
1	HCF_086	HCF_018	HCF	Hydei	Wild	Fruit	Guts	Proteobacteria	Gammaproteobacteria	Enterobacteriales	Enterobacteriaceae	Enterobacteriaceae Group Orbus
1	HCF_087	HCF_018	HCF	Hydei	Wild	Fruit	Guts	Proteobacteria	Gammaproteobacteria	Enterobacteriales	Enterobacteriaceae	Enterobacteriaceae Group Orbus
1	HCF_088	HCF_018	HCF	Hydei	Wild	Fruit	Guts	Proteobacteria	Gammaproteobacteria	Enterobacteriales	Enterobacteriaceae	Enterobacteriaceae Group Orbus
1	HCF_089	HCF_018	HCF	Hydei	Wild	Fruit	Guts	Proteobacteria	Gammaproteobacteria	Enterobacteriales	Enterobacteriaceae	Enterobacteriaceae Group Orbus
1	HCF_091	HCF_018	HCF	Hydei	Wild	Fruit	Guts	Proteobacteria	Gammaproteobacteria	Enterobacteriales	Enterobacteriaceae	Enterobacteriaceae Group Orbus
1	HCF_092	HCF_018	HCF	Hydei	Wild	Fruit	Guts	Proteobacteria	Gammaproteobacteria	Enterobacteriales	Enterobacteriaceae	Enterobacteriaceae Group Orbus
1	HCF_093	HCF_018	HCF	Hydei	Wild	Fruit	Guts	Proteobacteria	Gammaproteobacteria	Enterobacteriales	Enterobacteriaceae	Enterobacteriaceae Group Orbus
1	HCF_094	HCF_018	HCF	Hydei	Wild	Fruit	Guts	Proteobacteria	Gammaproteobacteria	Enterobacteriales	Enterobacteriaceae	Enterobacteriaceae Group Orbus
1	HCF_095	HCF_018	HCF	Hydei	Wild	Fruit	Guts	Proteobacteria	Gammaproteobacteria	Enterobacteriales	Enterobacteriaceae	Enterobacteriaceae Group Orbus
1	HCF_096	HCF_018	HCF	Hydei	Wild	Fruit	Guts	Proteobacteria	Gammaproteobacteria	Enterobacteriales	Enterobacteriaceae	Enterobacteriaceae Group Orbus
1	HPM_072	HCF_018	HPM	Hydei	Wild	Fruit	Guts	Proteobacteria	Gammaproteobacteria	Enterobacteriales	Enterobacteriaceae	Enterobacteriaceae Group Orbus
1	HPM_130	HCF_018	HPM	Hydei	Wild	Fruit	Guts	Proteobacteria	Gammaproteobacteria	Enterobacteriales	Enterobacteriaceae	Enterobacteriaceae Group Orbus
1	HPM_132	HCF_018	HPM	Hydei	Wild	Fruit	Guts	Proteobacteria	Gammaproteobacteria	Enterobacteriales	Enterobacteriaceae	Enterobacteriaceae Group Orbus
1	HPM_134	HCF_018	HPM	Hydei	Wild	Fruit	Guts	Proteobacteria	Gammaproteobacteria	Enterobacteriales	Enterobacteriaceae	Enterobacteriaceae Group Orbus
1	HPM_135	HCF_018	HPM	Hydei	Wild	Fruit	Guts	Proteobacteria	Gammaproteobacteria	Enterobacteriales	Enterobacteriaceae	Enterobacteriaceae Group Orbus
1	HPM_136	HCF_018	HPM	Hydei	Wild	Fruit	Guts	Proteobacteria	Gammaproteobacteria	Enterobacteriales	Enterobacteriaceae	Enterobacteriaceae Group Orbus
1	HPM_137	HCF_018	HPM	Hydei	Wild	Fruit	Guts	Proteobacteria	Gammaproteobacteria	Enterobacteriales	Enterobacteriaceae	Enterobacteriaceae Group Orbus
1	HPM_139	HCF_018	HPM	Hydei	Wild	Fruit	Guts	Proteobacteria	Gammaproteobacteria	Enterobacteriales	Enterobacteriaceae	Enterobacteriaceae Group Orbus
1	HPM_141	HCF_018	HPM	Hydei	Wild	Fruit	Guts	Proteobacteria	Gammaproteobacteria	Enterobacteriales	Enterobacteriaceae	Enterobacteriaceae Group Orbus
1	HPM_142	HCF_018	HPM	Hydei	Wild	Fruit	Guts	Proteobacteria	Gammaproteobacteria	Enterobacteriales	Enterobacteriaceae	Enterobacteriaceae Group Orbus
1	HPM_144	HCF_018	HPM	Hydei	Wild	Fruit	Guts	Proteobacteria	Gammaproteobacteria	Enterobacteriales	Enterobacteriaceae	Enterobacteriaceae Group Orbus
1	HPM_145	HCF_018	HPM	Hydei	Wild	Fruit	Guts	Proteobacteria	Gammaproteobacteria	Enterobacteriales	Enterobacteriaceae	Enterobacteriaceae Group Orbus
1	HPM_146	HCF_018	HPM	Hydei	Wild	Fruit	Guts	Proteobacteria	Gammaproteobacteria	Enterobacteriales	Enterobacteriaceae	Enterobacteriaceae Group Orbus
1	HPM_147	HCF_018	HPM	Hydei	Wild	Fruit	Guts	Proteobacteria	Gammaproteobacteria	Enterobacteriales	Enterobacteriaceae	Enterobacteriaceae Group Orbus
1	HPM_148	HCF_018	HPM	Hydei	Wild	Fruit	Guts	Proteobacteria	Gammaproteobacteria	Enterobacteriales	Enterobacteriaceae	Enterobacteriaceae Group Orbus
1	HPM_149	HCF_018	HPM	Hydei	Wild	Fruit	Guts	Proteobacteria	Gammaproteobacteria	Enterobacteriales	Enterobacteriaceae	Enterobacteriaceae Group Orbus
1	HPM_150	HCF_018	HPM	Hydei	Wild	Fruit	Guts	Proteobacteria	Gammaproteobacteria	Enterobacteriales	Enterobacteriaceae	Enterobacteriaceae Group Orbus
1	HPM_155	HCF_018	HPM	Hydei	Wild	Fruit	Guts	Proteobacteria	Gammaproteobacteria	Enterobacteriales	Enterobacteriaceae	Enterobacteriaceae Group Orbus
1	HPM_156	HCF_018	HPM	Hydei	Wild	Fruit	Guts	Proteobacteria	Gammaproteobacteria	Enterobacteriales	Enterobacteriaceae	Enterobacteriaceae Group Orbus
1	HPM_157	HCF_018	HPM	Hydei	Wild	Fruit	Guts	Proteobacteria	Gammaproteobacteria	Enterobacteriales	Enterobacteriaceae	Enterobacteriaceae Group Orbus
1	HPM_160	HCF_018	HPM	Hydei	Wild	Fruit	Guts	Proteobacteria	Gammaproteobacteria	Enterobacteriales	Enterobacteriaceae	Enterobacteriaceae Group Orbus
1	HPM_163	HCF_018	HPM	Hydei	Wild	Fruit	Guts	Proteobacteria	Gammaproteobacteria	Enterobacteriales	Enterobacteriaceae	Enterobacteriaceae Group Orbus
1	HPM_165	HCF_018	HPM	Hydei	Wild	Fruit	Guts	Proteobacteria	Gammaproteobacteria	Enterobacteriales	Enterobacteriaceae	Enterobacteriaceae Group Orbus
1	HPM_166	HCF_018	HPM	Hydei	Wild	Fruit	Guts	Proteobacteria	Gammaproteobacteria	Enterobacteriales	Enterobacteriaceae	Enterobacteriaceae Group Orbus
1	HPM_171	HCF_018	HPM	Hydei	Wild	Fruit	Guts	Proteobacteria	Gammaproteobacteria	Enterobacteriales	Enterobacteriaceae	Enterobacteriaceae Group Orbus
1	HPM_172	HCF_018	HPM	Hydei	Wild	Fruit	Guts	Proteobacteria	Gammaproteobacteria	Enterobacteriales	Enterobacteriaceae	Enterobacteriaceae Group Orbus
1	HPM_173	HCF_018	HPM	Hydei	Wild	Fruit	Guts	Proteobacteria	Gammaproteobacteria	Enterobacteriales	Enterobacteriaceae	Enterobacteriaceae Group Orbus
1	HPM_174	HCF_018	HPM	Hydei	Wild	Fruit	Guts	Proteobacteria	Gammaproteobacteria	Enterobacteriales	Enterobacteriaceae	Enterobacteriaceae Group Orbus
1	HPM_179	HCF_018	HPM	Hydei	Wild	Fruit	Guts	Proteobacteria	Gammaproteobacteria	Enterobacteriales	Enterobacteriaceae	Enterobacteriaceae Group Orbus
1	HPM_182	HCF_018	HPM	Hydei	Wild	Fruit	Guts	Proteobacteria	Gammaproteobacteria	Enterobacteriales	Enterobacteriaceae	Enterobacteriaceae Group Orbus
1	HPM_183	HCF_018	HPM	Hydei	Wild	Fruit	Guts	Proteobacteria	Gammaproteobacteria	Enterobacteriales	Enterobacteriaceae	Enterobacteriaceae Group Orbus
1	HPM_186	HCF_018	HPM	Hydei	Wild	Fruit	Guts	Proteobacteria	Gammaproteobacteria	Enterobacteriales	Enterobacteriaceae	Enterobacteriaceae Group Orbus
1	HPM_188	HCF_018	HPM	Hydei	Wild	Fruit	Guts	Proteobacteria	Gammaproteobacteria	Enterobacteriales	Enterobacteriaceae	Enterobacteriaceae Group Orbus
1	HPM_189	HCF_018	HPM	Hydei	Wild	Fruit	Guts	Proteobacteria	Gammaproteobacteria	Enterobacteriales	Enterobacteriaceae	Enterobacteriaceae Group Orbus
1	HPM_190	HCF_018	HPM	Hydei	Wild	Fruit	Guts	Proteobacteria	Gammaproteobacteria	Enterobacteriales	Enterobacteriaceae	Enterobacteriaceae Group Orbus
1	HPM_191	HCF_018	HPM	Hydei	Wild	Fruit	Guts	Proteobacteria	Gammaproteobacteria	Enterobacteriales	Enterobacteriaceae	Enterobacteriaceae Group Orbus
1	HPM_192	HCF_018	HPM	Hydei	Wild	Fruit	Guts	Proteobacteria	Gammaproteobacteria	Enterobacteriales	Enterobacteriaceae	Enterobacteriaceae Group Orbus
1	HPM_193	HCF_018	HPM	Hydei	Wild	Fruit	Guts	Proteobacteria	Gammaproteobacteria	Enterobacteriales	Enterobacteriaceae	Enterobacteriaceae Group Orbus
1	HPM_194	HCF_018	HPM	Hydei	Wild	Fruit	Guts	Proteobacteria	Gammaproteobacteria	Enterobacteriales	Enterobacteriaceae	Enterobacteriaceae Group Orbus
1	HPM_195	HCF_018	HPM	Hydei	Wild	Fruit	Guts	Proteobacteria	Gammaproteobacteria	Enterobacteriales	Enterobacteriaceae	Enterobacteriaceae Group Orbus
1	HPM_197	HCF_018	HPM	Hydei	Wild	Fruit	Guts	Proteobacteria	Gammaproteobacteria	Enterobacteriales	Enterobacteriaceae	Enterobacteriaceae Group Orbus
1	HPM_198	HCF_018	HPM	Hydei	Wild	Fruit	Guts	Proteobacteria	Gammaproteobacteria	Enterobacteriales	Enterobacteriaceae	Enterobacteriaceae Group Orbus
1	HPM_199	HCF_018	HPM	Hydei	Wild	Fruit	Guts	Proteobacteria	Gammaproteobacteria	Enterobacteriales	Enterobacteriaceae	Enterobacteriaceae Group Orbus
1	HPM_204	HCF_018	HPM	Hydei	Wild	Fruit	Guts	Proteobacteria	Gammaproteobacteria	Enterobacteriales	Enterobacteriaceae	Enterobacteriaceae Group Orbus
1	HPM_205	HCF_018	HPM	Hydei	Wild	Fruit	Guts	Proteobacteria	Gammaproteobacteria	Enterobacteriales	Enterobacteriaceae	Enterobacteriaceae Group Orbus
1	HPM_206	HCF_018	HPM	Hydei	Wild	Fruit	Guts	Proteobacteria	Gammaproteobacteria	Enterobacteriales	Enterobacteriaceae	Enterobacteriaceae Group Orbus
1	HPM_207	HCF_018	HPM	Hydei	Wild	Fruit	Guts	Proteobacteria	Gammaproteobacteria	Enterobacteriales	Enterobacteriaceae	Enterobacteriaceae Group Orbus
1	HPM_208	HCF_018	HPM	Hydei	Wild	Fruit	Guts	Proteobacteria	Gammaproteobacteria	Enterobacteriales	Enterobacteriaceae	Enterobacteriaceae Group Orbus
1	HPM_210	HCF_018	HPM	Hydei	Wild	Fruit	Guts	Proteobacteria	Gammaproteobacteria	Enterobacteriales	Enterobacteriaceae	Enterobacteriaceae Group Orbus
1	HPM_211	HCF_018	HPM	Hydei	Wild	Fruit	Guts	Proteobacteria	Gammaproteobacteria	Enterobacteriales	Enterobacteriaceae	Enterobacteriaceae Group Orbus
1	HPM_212	HCF_018	HPM	Hydei	Wild	Fruit	Guts	Proteobacteria	Gammaproteobacteria	Enterobacteriales	Enterobacteriaceae	Enterobacteriaceae Group Orbus
1	HPM_213	HCF_018	HPM	Hydei	Wild	Fruit	Guts	Proteobacteria	Gammaproteobacteria	Enterobacteriales	Enterobacteriaceae	Enterobacteriaceae Group Orbus
1	HPM_214	HCF_018	HPM	Hydei	Wild	Fruit	Guts	Proteobacteria	Gammaproteobacteria	Enterobacteriales	Enterobacteriaceae	Enterobacteriaceae Group Orbus
1	HPM_215	HCF_018	HPM	Hydei	Wild	Fruit	Guts	Proteobacteria	Gammaproteobacteria	Enterobacteriales	Enterobacteriaceae	Enterobacteriaceae Group Orbus
1	HPM_218	HCF_018	HPM	Hydei	Wild	Fruit	Guts	Proteobacteria	Gammaproteobacteria	Enterobacteriales	Enterobacteriaceae	Enterobacteriaceae Group Orbus
1	HPM_220	HCF_018	HPM	Hydei	Wild	Fruit	Guts	Proteobacteria	Gammaproteobacteria	Enterobacteriales	Enterobacteriaceae	Enterobacteriaceae Group Orbus
1	HPM_222	HCF_018	HPM	Hydei	Wild	Fruit	Guts	Proteobacteria	Gammaproteobacteria	Enterobacteriales	Enterobacteriaceae	Enterobacteriaceae Group Orbus
1	HPM_223	HCF_018	HPM	Hydei	Wild	Fruit	Guts	Proteobacteria	Gammaproteobacteria	Enterobacteriales	Enterobacteriaceae	Enterobacteriaceae Group Orbus
1	HPP_002	HCF_018	HPP	Hydei	Wild	Fruit	Guts	Proteobacteria	Gammaproteobacteria	Enterobacteriales	Enterobacteriaceae	Enterobacteriaceae Group Orbus
1	HPP_003	HCF_018	HPP	Hydei	Wild	Fruit	Guts	Proteobacteria	Gammaproteobacteria	Enterobacteriales	Enterobacteriaceae	Enterobacteriaceae Group Orbus
1	HPP_004	HCF_018	HPP	Hydei	Wild	Fruit	Guts	Proteobacteria	Gammaproteobacteria	Enterobacteriales	Enterobacteriaceae	Enterobacteriaceae Group Orbus
1	HPP_005	HCF_018	HPP	Hydei	Wild	Fruit	Guts	Proteobacteria	Gammaproteobacteria	Enterobacteriales	Enterobacteriaceae	Enterobacteriaceae Group Orbus
1	HPP_006	HCF_018	HPP	Hydei	Wild	Fruit	Guts	Proteobacteria	Gammaproteobacteria	Enterobacteriales	Enterobacteriaceae	Enterobacteriaceae Group Orbus
1	HPP_007	HCF_018	HPP	Hydei	Wild	Fruit	Guts	Proteobacteria	Gammaproteobacteria	Enterobacteriales	Enterobacteriaceae	Enterobacteriaceae Group Orbus
1	HPP_008	HCF_018	HPP	Hydei	Wild	Fruit	Guts	Proteobacteria	Gammaproteobacteria	Enterobacteriales	Enterobacteriaceae	Enterobacteriaceae Group Orbus
1	HPP_010	HCF_018	HPP	Hydei	Wild	Fruit	Guts	Proteobacteria	Gammaproteobacteria	Enterobacteriales	Enterobacteriaceae	Enterobacteriaceae Group Orbus
1	HPP_011	HCF_018	HPP	Hydei	Wild	Fruit	Guts	Proteobacteria	Gammaproteobacteria	Enterobacteriales	Enterobacteriaceae	Enterobacteriaceae Group Orbus
1	HPP_012	HCF_018	HPP	Hydei	Wild	Fruit	Guts	Proteobacteria	Gammaproteobacteria	Enterobacteriales	Enterobacteriaceae	Enterobacteriaceae Group Orbus
1	HPP_014	HCF_018	HPP	Hydei	Wild	Fruit	Guts	Proteobacteria	Gammaproteobacteria	Enterobacteriales	Enterobacteriaceae	Enterobacteriaceae Group Orbus
1	HPP_015	HCF_018	HPP	Hydei	Wild	Fruit	Guts	Proteobacteria	Gammaproteobacteria	Enterobacteriales	Enterobacteriaceae	Enterobacteriaceae Group Orbus
1	HPP_016	HCF_018	HPP	Hydei	Wild	Fruit	Guts	Proteobacteria	Gammaproteobacteria	Enterobacteriales	Enterobacteriaceae	Enterobacteriaceae Group Orbus
1	HPP_018	HCF_018	HPP	Hydei	Wild	Fruit	Guts	Proteobacteria	Gammaproteobacteria	Enterobacteriales	Enterobacteriaceae	Enterobacteriaceae Group Orbus
1	HPP_020	HCF_018	HPP	Hydei	Wild	Fruit	Guts	Proteobacteria	Gammaproteobacteria	Enterobacteriales	Enterobacteriaceae	Enterobacteriaceae Group Orbus
1	HPP_021	HCF_018	HPP	Hydei	Wild	Fruit	Guts	Proteobacteria	Gammaproteobacteria	Enterobacteriales	Enterobacteriaceae	Enterobacteriaceae Group Orbus
1	HPP_023	HCF_018	HPP	Hydei	Wild	Fruit	Guts	Proteobacteria	Gammaproteobacteria	Enterobacteriales	Enterobacteriaceae	Enterobacteriaceae Group Orbus
1	HPP_024	HCF_018	HPP	Hydei	Wild	Fruit	Guts	Proteobacteria	Gammaproteobacteria	Enterobacteriales	Enterobacteriaceae	Enterobacteriaceae Group Orbus
1	HPP_025	HCF_018	HPP	Hydei	Wild	Fruit	Guts	Proteobacteria	Gammaproteobacteria	Enterobacteriales	Enterobacteriaceae	Enterobacteriaceae Group Orbus
1	HPP_027	HCF_018	HPP	Hydei	Wild	Fruit	Guts	Proteobacteria	Gammaproteobacteria	Enterobacteriales	Enterobacteriaceae	Enterobacteriaceae Group Orbus
1	HPP_028	HCF_018	HPP	Hydei	Wild	Fruit	Guts	Proteobacteria	Gammaproteobacteria	Enterobacteriales	Enterobacteriaceae	Enterobacteriaceae Group Orbus
1	HPP_029	HCF_018	HPP	Hydei	Wild	Fruit	Guts	Proteobacteria	Gammaproteobacteria	Enterobacteriales	Enterobacteriaceae	Enterobacteriaceae Group Orbus
1	HPP_030	HCF_018	HPP	Hydei	Wild	Fruit	Guts	Proteobacteria	Gammaproteobacteria	Enterobacteriales	Enterobacteriaceae	Enterobacteriaceae Group Orbus
1	HPP_031	HCF_018	HPP	Hydei	Wild	Fruit	Guts	Proteobacteria	Gammaproteobacteria	Enterobacteriales	Enterobacteriaceae	Enterobacteriaceae Group Orbus
1	HPP_032	HCF_018	HPP	Hydei	Wild	Fruit	Guts	Proteobacteria	Gammaproteobacteria	Enterobacteriales	Enterobacteriaceae	Enterobacteriaceae Group Orbus
1	HPP_033	HCF_018	HPP	Hydei	Wild	Fruit	Guts	Proteobacteria	Gammaproteobacteria	Enterobacteriales	Enterobacteriaceae	Enterobacteriaceae Group Orbus
1	HPP_034	HCF_018	HPP	Hydei	Wild	Fruit	Guts	Proteobacteria	Gammaproteobacteria	Enterobacteriales	Enterobacteriaceae	Enterobacteriaceae Group Orbus
1	HPP_035	HCF_018	HPP	Hydei	Wild	Fruit	Guts	Proteobacteria	Gammaproteobacteria	Enterobacteriales	Enterobacteriaceae	Enterobacteriaceae Group Orbus
1	HPP_036	HCF_018	HPP	Hydei	Wild	Fruit	Guts	Proteobacteria	Gammaproteobacteria	Enterobacteriales	Enterobacteriaceae	Enterobacteriaceae Group Orbus
1	HPP_037	HCF_018	HPP	Hydei	Wild	Fruit	Guts	Proteobacteria	Gammaproteobacteria	Enterobacteriales	Enterobacteriaceae	Enterobacteriaceae Group Orbus
1	HPP_039	HCF_018	HPP	Hydei	Wild	Fruit	Guts	Proteobacteria	Gammaproteobacteria	Enterobacteriales	Enterobacteriaceae	Enterobacteriaceae Group Orbus
1	HPP_040	HCF_018	HPP	Hydei	Wild	Fruit	Guts	Proteobacteria	Gammaproteobacteria	Enterobacteriales	Enterobacteriaceae	Enterobacteriaceae Group Orbus
1	HPP_041	HCF_018	HPP	Hydei	Wild	Fruit	Guts	Proteobacteria	Gammaproteobacteria	Enterobacteriales	Enterobacteriaceae	Enterobacteriaceae Group Orbus
1	HPP_042	HCF_018	HPP	Hydei	Wild	Fruit	Guts	Proteobacteria	Gammaproteobacteria	Enterobacteriales	Enterobacteriaceae	Enterobacteriaceae Group Orbus
1	HPP_043	HCF_018	HPP	Hydei	Wild	Fruit	Guts	Proteobacteria	Gammaproteobacteria	Enterobacteriales	Enterobacteriaceae	Enterobacteriaceae Group Orbus
1	HPP_044	HCF_018	HPP	Hydei	Wild	Fruit	Guts	Proteobacteria	Gammaproteobacteria	Enterobacteriales	Enterobacteriaceae	Enterobacteriaceae Group Orbus
1	HPP_045	HCF_018	HPP	Hydei	Wild	Fruit	Guts	Proteobacteria	Gammaproteobacteria	Enterobacteriales	Enterobacteriaceae	Enterobacteriaceae Group Orbus
1	HPP_047	HCF_018	HPP	Hydei	Wild	Fruit	Guts	Proteobacteria	Gammaproteobacteria	Enterobacteriales	Enterobacteriaceae	Enterobacteriaceae Group Orbus
1	HPP_048	HCF_018	HPP	Hydei	Wild	Fruit	Guts	Proteobacteria	Gammaproteobacteria	Enterobacteriales	Enterobacteriaceae	Enterobacteriaceae Group Orbus
1	HPP_050	HCF_018	HPP	Hydei	Wild	Fruit	Guts	Proteobacteria	Gammaproteobacteria	Enterobacteriales	Enterobacteriaceae	Enterobacteriaceae Group Orbus
1	HPP_051	HCF_018	HPP	Hydei	Wild	Fruit	Guts	Proteobacteria	Gammaproteobacteria	Enterobacteriales	Enterobacteriaceae	Enterobacteriaceae Group Orbus
1	HPP_053	HCF_018	HPP	Hydei	Wild	Fruit	Guts	Proteobacteria	Gammaproteobacteria	Enterobacteriales	Enterobacteriaceae	Enterobacteriaceae Group Orbus
1	HPP_055	HCF_018	HPP	Hydei	Wild	Fruit	Guts	Proteobacteria	Gammaproteobacteria	Enterobacteriales	Enterobacteriaceae	Enterobacteriaceae Group Orbus
1	HPP_056	HCF_018	HPP	Hydei	Wild	Fruit	Guts	Proteobacteria	Gammaproteobacteria	Enterobacteriales	Enterobacteriaceae	Enterobacteriaceae Group Orbus
1	HPP_057	HCF_018	HPP	Hydei	Wild	Fruit	Guts	Proteobacteria	Gammaproteobacteria	Enterobacteriales	Enterobacteriaceae	Enterobacteriaceae Group Orbus
1	HPP_058	HCF_018	HPP	Hydei	Wild	Fruit	Guts	Proteobacteria	Gammaproteobacteria	Enterobacteriales	Enterobacteriaceae	Enterobacteriaceae Group Orbus
1	HPP_059	HCF_018	HPP	Hydei	Wild	Fruit	Guts	Proteobacteria	Gammaproteobacteria	Enterobacteriales	Enterobacteriaceae	Enterobacteriaceae Group Orbus
1	HPP_060	HCF_018	HPP	Hydei	Wild	Fruit	Guts	Proteobacteria	Gammaproteobacteria	Enterobacteriales	Enterobacteriaceae	Enterobacteriaceae Group Orbus
1	HPP_061	HCF_018	HPP	Hydei	Wild	Fruit	Guts	Proteobacteria	Gammaproteobacteria	Enterobacteriales	Enterobacteriaceae	Enterobacteriaceae Group Orbus
1	HPP_062	HCF_018	HPP	Hydei	Wild	Fruit	Guts	Proteobacteria	Gammaproteobacteria	Enterobacteriales	Enterobacteriaceae	Enterobacteriaceae Group Orbus
1	HPP_063	HCF_018	HPP	Hydei	Wild	Fruit	Guts	Proteobacteria	Gammaproteobacteria	Enterobacteriales	Enterobacteriaceae	Enterobacteriaceae Group Orbus
1	HPP_064	HCF_018	HPP	Hydei	Wild	Fruit	Guts	Proteobacteria	Gammaproteobacteria	Enterobacteriales	Enterobacteriaceae	Enterobacteriaceae Group Orbus
1	HPP_065	HCF_018	HPP	Hydei	Wild	Fruit	Guts	Proteobacteria	Gammaproteobacteria	Enterobacteriales	Enterobacteriaceae	Enterobacteriaceae Group Orbus
1	HPP_066	HCF_018	HPP	Hydei	Wild	Fruit	Guts	Proteobacteria	Gammaproteobacteria	Enterobacteriales	Enterobacteriaceae	Enterobacteriaceae Group Orbus
1	HPP_068	HCF_018	HPP	Hydei	Wild	Fruit	Guts	Proteobacteria	Gammaproteobacteria	Enterobacteriales	Enterobacteriaceae	Enterobacteriaceae Group Orbus
1	HPP_069	HCF_018	HPP	Hydei	Wild	Fruit	Guts	Proteobacteria	Gammaproteobacteria	Enterobacteriales	Enterobacteriaceae	Enterobacteriaceae Group Orbus
1	HPP_071	HCF_018	HPP	Hydei	Wild	Fruit	Guts	Proteobacteria	Gammaproteobacteria	Enterobacteriales	Enterobacteriaceae	Enterobacteriaceae Group Orbus
1	HPP_072	HCF_018	HPP	Hydei	Wild	Fruit	Guts	Proteobacteria	Gammaproteobacteria	Enterobacteriales	Enterobacteriaceae	Enterobacteriaceae Group Orbus
1	HPP_073	HCF_018	HPP	Hydei	Wild	Fruit	Guts	Proteobacteria	Gammaproteobacteria	Enterobacteriales	Enterobacteriaceae	Enterobacteriaceae Group Orbus
1	HPP_074	HCF_018	HPP	Hydei	Wild	Fruit	Guts	Proteobacteria	Gammaproteobacteria	Enterobacteriales	Enterobacteriaceae	Enterobacteriaceae Group Orbus
1	HPP_076	HCF_018	HPP	Hydei	Wild	Fruit	Guts	Proteobacteria	Gammaproteobacteria	Enterobacteriales	Enterobacteriaceae	Enterobacteriaceae Group Orbus
1	HPP_077	HCF_018	HPP	Hydei	Wild	Fruit	Guts	Proteobacteria	Gammaproteobacteria	Enterobacteriales	Enterobacteriaceae	Enterobacteriaceae Group Orbus
1	HPP_078	HCF_018	HPP	Hydei	Wild	Fruit	Guts	Proteobacteria	Gammaproteobacteria	Enterobacteriales	Enterobacteriaceae	Enterobacteriaceae Group Orbus
1	HPP_079	HCF_018	HPP	Hydei	Wild	Fruit	Guts	Proteobacteria	Gammaproteobacteria	Enterobacteriales	Enterobacteriaceae	Enterobacteriaceae Group Orbus
1	HPP_080	HCF_018	HPP	Hydei	Wild	Fruit	Guts	Proteobacteria	Gammaproteobacteria	Enterobacteriales	Enterobacteriaceae	Enterobacteriaceae Group Orbus
1	HPP_081	HCF_018	HPP	Hydei	Wild	Fruit	Guts	Proteobacteria	Gammaproteobacteria	Enterobacteriales	Enterobacteriaceae	Enterobacteriaceae Group Orbus
1	HPP_084	HCF_018	HPP	Hydei	Wild	Fruit	Guts	Proteobacteria	Gammaproteobacteria	Enterobacteriales	Enterobacteriaceae	Enterobacteriaceae Group Orbus
1	HPP_085	HCF_018	HPP	Hydei	Wild	Fruit	Guts	Proteobacteria	Gammaproteobacteria	Enterobacteriales	Enterobacteriaceae	Enterobacteriaceae Group Orbus
1	HPP_086	HCF_018	HPP	Hydei	Wild	Fruit	Guts	Proteobacteria	Gammaproteobacteria	Enterobacteriales	Enterobacteriaceae	Enterobacteriaceae Group Orbus
1	HPP_087	HCF_018	HPP	Hydei	Wild	Fruit	Guts	Proteobacteria	Gammaproteobacteria	Enterobacteriales	Enterobacteriaceae	Enterobacteriaceae Group Orbus
1	HPP_088	HCF_018	HPP	Hydei	Wild	Fruit	Guts	Proteobacteria	Gammaproteobacteria	Enterobacteriales	Enterobacteriaceae	Enterobacteriaceae Group Orbus
1	HPP_091	HCF_018	HPP	Hydei	Wild	Fruit	Guts	Proteobacteria	Gammaproteobacteria	Enterobacteriales	Enterobacteriaceae	Enterobacteriaceae Group Orbus
1	HPP_092	HCF_018	HPP	Hydei	Wild	Fruit	Guts	Proteobacteria	Gammaproteobacteria	Enterobacteriales	Enterobacteriaceae	Enterobacteriaceae Group Orbus
1	HPP_093	HCF_018	HPP	Hydei	Wild	Fruit	Guts	Proteobacteria	Gammaproteobacteria	Enterobacteriales	Enterobacteriaceae	Enterobacteriaceae Group Orbus
1	HPP_094	HCF_018	HPP	Hydei	Wild	Fruit	Guts	Proteobacteria	Gammaproteobacteria	Enterobacteriales	Enterobacteriaceae	Enterobacteriaceae Group Orbus
1	HPP_095	HCF_018	HPP	Hydei	Wild	Fruit	Guts	Proteobacteria	Gammaproteobacteria	Enterobacteriales	Enterobacteriaceae	Enterobacteriaceae Group Orbus
1	HPP_096	HCF_018	HPP	Hydei	Wild	Fruit	Guts	Proteobacteria	Gammaproteobacteria	Enterobacteriales	Enterobacteriaceae	Enterobacteriaceae Group Orbus
1	HPM_009	XDM_053	HPM	Hydei	Wild	Fruit	Guts	Proteobacteria	Gammaproteobacteria	Enterobacteriales	Enterobacteriaceae	Enterobacteriaceae Group Orbus
1	HPM_010	XDM_053	HPM	Hydei	Wild	Fruit	Guts	Proteobacteria	Gammaproteobacteria	Enterobacteriales	Enterobacteriaceae	Enterobacteriaceae Group Orbus
1	HPM_011	XDM_053	HPM	Hydei	Wild	Fruit	Guts	Proteobacteria	Gammaproteobacteria	Enterobacteriales	Enterobacteriaceae	Enterobacteriaceae Group Orbus
1	HPM_012	XDM_053	HPM	Hydei	Wild	Fruit	Guts	Proteobacteria	Gammaproteobacteria	Enterobacteriales	Enterobacteriaceae	Enterobacteriaceae Group Orbus
1	HPM_013	XDM_053	HPM	Hydei	Wild	Fruit	Guts	Proteobacteria	Gammaproteobacteria	Enterobacteriales	Enterobacteriaceae	Enterobacteriaceae Group Orbus
1	HPM_014	XDM_053	HPM	Hydei	Wild	Fruit	Guts	Proteobacteria	Gammaproteobacteria	Enterobacteriales	Enterobacteriaceae	Enterobacteriaceae Group Orbus
1	HPM_015	XDM_053	HPM	Hydei	Wild	Fruit	Guts	Proteobacteria	Gammaproteobacteria	Enterobacteriales	Enterobacteriaceae	Enterobacteriaceae Group Orbus
1	HPM_016	XDM_053	HPM	Hydei	Wild	Fruit	Guts	Proteobacteria	Gammaproteobacteria	Enterobacteriales	Enterobacteriaceae	Enterobacteriaceae Group Orbus
1	HPM_017	XDM_053	HPM	Hydei	Wild	Fruit	Guts	Proteobacteria	Gammaproteobacteria	Enterobacteriales	Enterobacteriaceae	Enterobacteriaceae Group Orbus
1	HPM_018	XDM_053	HPM	Hydei	Wild	Fruit	Guts	Proteobacteria	Gammaproteobacteria	Enterobacteriales	Enterobacteriaceae	Enterobacteriaceae Group Orbus
1	HPM_019	XDM_053	HPM	Hydei	Wild	Fruit	Guts	Proteobacteria	Gammaproteobacteria	Enterobacteriales	Enterobacteriaceae	Enterobacteriaceae Group Orbus
1	HPM_020	XDM_053	HPM	Hydei	Wild	Fruit	Guts	Proteobacteria	Gammaproteobacteria	Enterobacteriales	Enterobacteriaceae	Enterobacteriaceae Group Orbus
1	HPM_021	XDM_053	HPM	Hydei	Wild	Fruit	Guts	Proteobacteria	Gammaproteobacteria	Enterobacteriales	Enterobacteriaceae	Enterobacteriaceae Group Orbus
1	HPM_022	XDM_053	HPM	Hydei	Wild	Fruit	Guts	Proteobacteria	Gammaproteobacteria	Enterobacteriales	Enterobacteriaceae	Enterobacteriaceae Group Orbus
1	HPM_023	XDM_053	HPM	Hydei	Wild	Fruit	Guts	Proteobacteria	Gammaproteobacteria	Enterobacteriales	Enterobacteriaceae	Enterobacteriaceae Group Orbus
1	HPM_024	XDM_053	HPM	Hydei	Wild	Fruit	Guts	Proteobacteria	Gammaproteobacteria	Enterobacteriales	Enterobacteriaceae	Enterobacteriaceae Group Orbus
1	HPM_025	XDM_053	HPM	Hydei	Wild	Fruit	Guts	Proteobacteria	Gammaproteobacteria	Enterobacteriales	Enterobacteriaceae	Enterobacteriaceae Group Orbus
1	HPM_026	XDM_053	HPM	Hydei	Wild	Fruit	Guts	Proteobacteria	Gammaproteobacteria	Enterobacteriales	Enterobacteriaceae	Enterobacteriaceae Group Orbus
1	HPM_027	XDM_053	HPM	Hydei	Wild	Fruit	Guts	Proteobacteria	Gammaproteobacteria	Enterobacteriales	Enterobacteriaceae	Enterobacteriaceae Group Orbus
1	HPM_028	XDM_053	HPM	Hydei	Wild	Fruit	Guts	Proteobacteria	Gammaproteobacteria	Enterobacteriales	Enterobacteriaceae	Enterobacteriaceae Group Orbus
1	HPM_029	XDM_053	HPM	Hydei	Wild	Fruit	Guts	Proteobacteria	Gammaproteobacteria	Enterobacteriales	Enterobacteriaceae	Enterobacteriaceae Group Orbus
1	HPM_030	XDM_053	HPM	Hydei	Wild	Fruit	Guts	Proteobacteria	Gammaproteobacteria	Enterobacteriales	Enterobacteriaceae	Enterobacteriaceae Group Orbus
1	HPM_031	XDM_053	HPM	Hydei	Wild	Fruit	Guts	Proteobacteria	Gammaproteobacteria	Enterobacteriales	Enterobacteriaceae	Enterobacteriaceae Group Orbus
1	HPM_035	XDM_053	HPM	Hydei	Wild	Fruit	Guts	Proteobacteria	Gammaproteobacteria	Enterobacteriales	Enterobacteriaceae	Enterobacteriaceae Group Orbus
1	HPM_037	XDM_053	HPM	Hydei	Wild	Fruit	Guts	Proteobacteria	Gammaproteobacteria	Enterobacteriales	Enterobacteriaceae	Enterobacteriaceae Group Orbus
1	HPM_039	XDM_053	HPM	Hydei	Wild	Fruit	Guts	Proteobacteria	Gammaproteobacteria	Enterobacteriales	Enterobacteriaceae	Enterobacteriaceae Group Orbus
1	HPM_040	XDM_053	HPM	Hydei	Wild	Fruit	Guts	Proteobacteria	Gammaproteobacteria	Enterobacteriales	Enterobacteriaceae	Enterobacteriaceae Group Orbus
1	HPM_041	XDM_053	HPM	Hydei	Wild	Fruit	Guts	Proteobacteria	Gammaproteobacteria	Enterobacteriales	Enterobacteriaceae	Enterobacteriaceae Group Orbus
1	HPM_042	XDM_053	HPM	Hydei	Wild	Fruit	Guts	Proteobacteria	Gammaproteobacteria	Enterobacteriales	Enterobacteriaceae	Enterobacteriaceae Group Orbus
1	HPM_043	XDM_053	HPM	Hydei	Wild	Fruit	Guts	Proteobacteria	Gammaproteobacteria	Enterobacteriales	Enterobacteriaceae	Enterobacteriaceae Group Orbus
1	HPM_044	XDM_053	HPM	Hydei	Wild	Fruit	Guts	Proteobacteria	Gammaproteobacteria	Enterobacteriales	Enterobacteriaceae	Enterobacteriaceae Group Orbus
1	HPM_045	XDM_053	HPM	Hydei	Wild	Fruit	Guts	Proteobacteria	Gammaproteobacteria	Enterobacteriales	Enterobacteriaceae	Enterobacteriaceae Group Orbus
1	HPM_046	XDM_053	HPM	Hydei	Wild	Fruit	Guts	Proteobacteria	Gammaproteobacteria	Enterobacteriales	Enterobacteriaceae	Enterobacteriaceae Group Orbus
1	HPM_047	XDM_053	HPM	Hydei	Wild	Fruit	Guts	Proteobacteria	Gammaproteobacteria	Enterobacteriales	Enterobacteriaceae	Enterobacteriaceae Group Orbus
1	HPM_048	XDM_053	HPM	Hydei	Wild	Fruit	Guts	Proteobacteria	Gammaproteobacteria	Enterobacteriales	Enterobacteriaceae	Enterobacteriaceae Group Orbus
1	HPM_050	XDM_053	HPM	Hydei	Wild	Fruit	Guts	Proteobacteria	Gammaproteobacteria	Enterobacteriales	Enterobacteriaceae	Enterobacteriaceae Group Orbus
1	HPM_051	XDM_053	HPM	Hydei	Wild	Fruit	Guts	Proteobacteria	Gammaproteobacteria	Enterobacteriales	Enterobacteriaceae	Enterobacteriaceae Group Orbus
1	HPM_054	XDM_053	HPM	Hydei	Wild	Fruit	Guts	Proteobacteria	Gammaproteobacteria	Enterobacteriales	Enterobacteriaceae	Enterobacteriaceae Group Orbus
1	HPM_055	XDM_053	HPM	Hydei	Wild	Fruit	Guts	Proteobacteria	Gammaproteobacteria	Enterobacteriales	Enterobacteriaceae	Enterobacteriaceae Group Orbus
1	HPM_057	XDM_053	HPM	Hydei	Wild	Fruit	Guts	Proteobacteria	Gammaproteobacteria	Enterobacteriales	Enterobacteriaceae	Enterobacteriaceae Group Orbus
1	HPM_058	XDM_053	HPM	Hydei	Wild	Fruit	Guts	Proteobacteria	Gammaproteobacteria	Enterobacteriales	Enterobacteriaceae	Enterobacteriaceae Group Orbus
1	HPM_060	XDM_053	HPM	Hydei	Wild	Fruit	Guts	Proteobacteria	Gammaproteobacteria	Enterobacteriales	Enterobacteriaceae	Enterobacteriaceae Group Orbus
1	HPM_062	XDM_053	HPM	Hydei	Wild	Fruit	Guts	Proteobacteria	Gammaproteobacteria	Enterobacteriales	Enterobacteriaceae	Enterobacteriaceae Group Orbus
1	HPM_064	XDM_053	HPM	Hydei	Wild	Fruit	Guts	Proteobacteria	Gammaproteobacteria	Enterobacteriales	Enterobacteriaceae	Enterobacteriaceae Group Orbus
1	HPM_065	XDM_053	HPM	Hydei	Wild	Fruit	Guts	Proteobacteria	Gammaproteobacteria	Enterobacteriales	Enterobacteriaceae	Enterobacteriaceae Group Orbus
1	HPM_066	XDM_053	HPM	Hydei	Wild	Fruit	Guts	Proteobacteria	Gammaproteobacteria	Enterobacteriales	Enterobacteriaceae	Enterobacteriaceae Group Orbus
1	HPM_067	XDM_053	HPM	Hydei	Wild	Fruit	Guts	Proteobacteria	Gammaproteobacteria	Enterobacteriales	Enterobacteriaceae	Enterobacteriaceae Group Orbus
1	HPM_070	XDM_053	HPM	Hydei	Wild	Fruit	Guts	Proteobacteria	Gammaproteobacteria	Enterobacteriales	Enterobacteriaceae	Enterobacteriaceae Group Orbus
1	HPM_073	XDM_053	HPM	Hydei	Wild	Fruit	Guts	Proteobacteria	Gammaproteobacteria	Enterobacteriales	Enterobacteriaceae	Enterobacteriaceae Group Orbus
1	HPM_074	XDM_053	HPM	Hydei	Wild	Fruit	Guts	Proteobacteria	Gammaproteobacteria	Enterobacteriales	Enterobacteriaceae	Enterobacteriaceae Group Orbus
1	HPM_075	XDM_053	HPM	Hydei	Wild	Fruit	Guts	Proteobacteria	Gammaproteobacteria	Enterobacteriales	Enterobacteriaceae	Enterobacteriaceae Group Orbus
1	HPM_078	XDM_053	HPM	Hydei	Wild	Fruit	Guts	Proteobacteria	Gammaproteobacteria	Enterobacteriales	Enterobacteriaceae	Enterobacteriaceae Group Orbus
1	HPM_079	XDM_053	HPM	Hydei	Wild	Fruit	Guts	Proteobacteria	Gammaproteobacteria	Enterobacteriales	Enterobacteriaceae	Enterobacteriaceae Group Orbus
1	HPM_080	XDM_053	HPM	Hydei	Wild	Fruit	Guts	Proteobacteria	Gammaproteobacteria	Enterobacteriales	Enterobacteriaceae	Enterobacteriaceae Group Orbus
1	HPM_081	XDM_053	HPM	Hydei	Wild	Fruit	Guts	Proteobacteria	Gammaproteobacteria	Enterobacteriales	Enterobacteriaceae	Enterobacteriaceae Group Orbus
1	HPM_082	XDM_053	HPM	Hydei	Wild	Fruit	Guts	Proteobacteria	Gammaproteobacteria	Enterobacteriales	Enterobacteriaceae	Enterobacteriaceae Group Orbus
1	HPM_084	XDM_053	HPM	Hydei	Wild	Fruit	Guts	Proteobacteria	Gammaproteobacteria	Enterobacteriales	Enterobacteriaceae	Enterobacteriaceae Group Orbus
1	HPM_088	XDM_053	HPM	Hydei	Wild	Fruit	Guts	Proteobacteria	Gammaproteobacteria	Enterobacteriales	Enterobacteriaceae	Enterobacteriaceae Group Orbus
1	HPM_089	XDM_053	HPM	Hydei	Wild	Fruit	Guts	Proteobacteria	Gammaproteobacteria	Enterobacteriales	Enterobacteriaceae	Enterobacteriaceae Group Orbus
1	HPM_090	XDM_053	HPM	Hydei	Wild	Fruit	Guts	Proteobacteria	Gammaproteobacteria	Enterobacteriales	Enterobacteriaceae	Enterobacteriaceae Group Orbus
1	HPM_091	XDM_053	HPM	Hydei	Wild	Fruit	Guts	Proteobacteria	Gammaproteobacteria	Enterobacteriales	Enterobacteriaceae	Enterobacteriaceae Group Orbus
1	HPM_097	XDM_053	HPM	Hydei	Wild	Fruit	Guts	Proteobacteria	Gammaproteobacteria	Enterobacteriales	Enterobacteriaceae	Enterobacteriaceae Group Orbus
1	HPM_100	XDM_053	HPM	Hydei	Wild	Fruit	Guts	Proteobacteria	Gammaproteobacteria	Enterobacteriales	Enterobacteriaceae	Enterobacteriaceae Group Orbus
1	HPM_101	XDM_053	HPM	Hydei	Wild	Fruit	Guts	Proteobacteria	Gammaproteobacteria	Enterobacteriales	Enterobacteriaceae	Enterobacteriaceae Group Orbus
1	HPM_102	XDM_053	HPM	Hydei	Wild	Fruit	Guts	Proteobacteria	Gammaproteobacteria	Enterobacteriales	Enterobacteriaceae	Enterobacteriaceae Group Orbus
1	HPM_103	XDM_053	HPM	Hydei	Wild	Fruit	Guts	Proteobacteria	Gammaproteobacteria	Enterobacteriales	Enterobacteriaceae	Enterobacteriaceae Group Orbus
1	HPM_104	XDM_053	HPM	Hydei	Wild	Fruit	Guts	Proteobacteria	Gammaproteobacteria	Enterobacteriales	Enterobacteriaceae	Enterobacteriaceae Group Orbus
1	HPM_105	XDM_053	HPM	Hydei	Wild	Fruit	Guts	Proteobacteria	Gammaproteobacteria	Enterobacteriales	Enterobacteriaceae	Enterobacteriaceae Group Orbus
1	HPM_106	XDM_053	HPM	Hydei	Wild	Fruit	Guts	Proteobacteria	Gammaproteobacteria	Enterobacteriales	Enterobacteriaceae	Enterobacteriaceae Group Orbus
1	HPM_107	XDM_053	HPM	Hydei	Wild	Fruit	Guts	Proteobacteria	Gammaproteobacteria	Enterobacteriales	Enterobacteriaceae	Enterobacteriaceae Group Orbus
1	HPM_109	XDM_053	HPM	Hydei	Wild	Fruit	Guts	Proteobacteria	Gammaproteobacteria	Enterobacteriales	Enterobacteriaceae	Enterobacteriaceae Group Orbus
1	HPM_110	XDM_053	HPM	Hydei	Wild	Fruit	Guts	Proteobacteria	Gammaproteobacteria	Enterobacteriales	Enterobacteriaceae	Enterobacteriaceae Group Orbus
1	HPM_112	XDM_053	HPM	Hydei	Wild	Fruit	Guts	Proteobacteria	Gammaproteobacteria	Enterobacteriales	Enterobacteriaceae	Enterobacteriaceae Group Orbus
1	HPM_113	XDM_053	HPM	Hydei	Wild	Fruit	Guts	Proteobacteria	Gammaproteobacteria	Enterobacteriales	Enterobacteriaceae	Enterobacteriaceae Group Orbus
1	HPM_114	XDM_053	HPM	Hydei	Wild	Fruit	Guts	Proteobacteria	Gammaproteobacteria	Enterobacteriales	Enterobacteriaceae	Enterobacteriaceae Group Orbus
1	HPM_115	XDM_053	HPM	Hydei	Wild	Fruit	Guts	Proteobacteria	Gammaproteobacteria	Enterobacteriales	Enterobacteriaceae	Enterobacteriaceae Group Orbus
1	HPM_116	XDM_053	HPM	Hydei	Wild	Fruit	Guts	Proteobacteria	Gammaproteobacteria	Enterobacteriales	Enterobacteriaceae	Enterobacteriaceae Group Orbus
1	HPM_117	XDM_053	HPM	Hydei	Wild	Fruit	Guts	Proteobacteria	Gammaproteobacteria	Enterobacteriales	Enterobacteriaceae	Enterobacteriaceae Group Orbus
1	HPM_118	XDM_053	HPM	Hydei	Wild	Fruit	Guts	Proteobacteria	Gammaproteobacteria	Enterobacteriales	Enterobacteriaceae	Enterobacteriaceae Group Orbus
1	HPM_119	XDM_053	HPM	Hydei	Wild	Fruit	Guts	Proteobacteria	Gammaproteobacteria	Enterobacteriales	Enterobacteriaceae	Enterobacteriaceae Group Orbus
1	HPM_120	XDM_053	HPM	Hydei	Wild	Fruit	Guts	Proteobacteria	Gammaproteobacteria	Enterobacteriales	Enterobacteriaceae	Enterobacteriaceae Group Orbus
1	HPM_121	XDM_053	HPM	Hydei	Wild	Fruit	Guts	Proteobacteria	Gammaproteobacteria	Enterobacteriales	Enterobacteriaceae	Enterobacteriaceae Group Orbus
1	HPM_122	XDM_053	HPM	Hydei	Wild	Fruit	Guts	Proteobacteria	Gammaproteobacteria	Enterobacteriales	Enterobacteriaceae	Enterobacteriaceae Group Orbus
1	HPM_123	XDM_053	HPM	Hydei	Wild	Fruit	Guts	Proteobacteria	Gammaproteobacteria	Enterobacteriales	Enterobacteriaceae	Enterobacteriaceae Group Orbus
1	HPM_124	XDM_053	HPM	Hydei	Wild	Fruit	Guts	Proteobacteria	Gammaproteobacteria	Enterobacteriales	Enterobacteriaceae	Enterobacteriaceae Group Orbus
1	HPM_125	XDM_053	HPM	Hydei	Wild	Fruit	Guts	Proteobacteria	Gammaproteobacteria	Enterobacteriales	Enterobacteriaceae	Enterobacteriaceae Group Orbus
1	HPM_126	XDM_053	HPM	Hydei	Wild	Fruit	Guts	Proteobacteria	Gammaproteobacteria	Enterobacteriales	Enterobacteriaceae	Enterobacteriaceae Group Orbus
1	HPM_127	XDM_053	HPM	Hydei	Wild	Fruit	Guts	Proteobacteria	Gammaproteobacteria	Enterobacteriales	Enterobacteriaceae	Enterobacteriaceae Group Orbus
1	HPM_083	SCA_204	HPM	Hydei	Wild	Fruit	Guts	Proteobacteria	Gammaproteobacteria	Enterobacteriales	Enterobacteriaceae	Enterobacteriaceae Group Orbus
1	HCF_017	SEC_085	HCF	Hydei	Wild	Fruit	Guts	Firmicutes	Bacilli	Lactobacillales	Enterococcaceae	Vagococcus
1	HCF_020	SEC_085	HCF	Hydei	Wild	Fruit	Guts	Firmicutes	Bacilli	Lactobacillales	Enterococcaceae	Vagococcus
1	HCF_025	SEC_085	HCF	Hydei	Wild	Fruit	Guts	Firmicutes	Bacilli	Lactobacillales	Enterococcaceae	Vagococcus
1	HCF_052	SEC_085	HCF	Hydei	Wild	Fruit	Guts	Firmicutes	Bacilli	Lactobacillales	Enterococcaceae	Vagococcus
1	HCF_057	SEC_085	HCF	Hydei	Wild	Fruit	Guts	Firmicutes	Bacilli	Lactobacillales	Enterococcaceae	Vagococcus
1	HCF_064	SEC_085	HCF	Hydei	Wild	Fruit	Guts	Firmicutes	Bacilli	Lactobacillales	Enterococcaceae	Vagococcus
1	HCF_085	SEC_085	HCF	Hydei	Wild	Fruit	Guts	Firmicutes	Bacilli	Lactobacillales	Enterococcaceae	Vagococcus
1	HPP_009	SEC_085	HPP	Hydei	Wild	Fruit	Guts	Firmicutes	Bacilli	Lactobacillales	Enterococcaceae	Vagococcus
1	HPP_013	SEC_085	HPP	Hydei	Wild	Fruit	Guts	Firmicutes	Bacilli	Lactobacillales	Enterococcaceae	Vagococcus
1	HPP_022	SEC_085	HPP	Hydei	Wild	Fruit	Guts	Firmicutes	Bacilli	Lactobacillales	Enterococcaceae	Vagococcus
1	HPP_052	SEC_085	HPP	Hydei	Wild	Fruit	Guts	Firmicutes	Bacilli	Lactobacillales	Enterococcaceae	Vagococcus
1	HPP_070	SEC_085	HPP	Hydei	Wild	Fruit	Guts	Firmicutes	Bacilli	Lactobacillales	Enterococcaceae	Vagococcus
1	HPP_090	SEC_085	HPP	Hydei	Wild	Fruit	Guts	Firmicutes	Bacilli	Lactobacillales	Enterococcaceae	Vagococcus
1	HPM_151	HPM_151	HPM	Hydei	Wild	Fruit	Guts	Firmicutes	Bacilli	Lactobacillales	Leuconostocaceae	Weissella
1	HPM_161	HPM_161	HPM	Hydei	Wild	Fruit	Guts	Firmicutes	Bacilli	Lactobacillales	Leuconostocaceae	Weissella
1	HPM_168	HPM_161	HPM	Hydei	Wild	Fruit	Guts	Firmicutes	Bacilli	Lactobacillales	Leuconostocaceae	Weissella
1	ICF_015	HCF_053	ICF	Immigrans	Wild	Fruit	Guts	Bacteroidetes	Bacteroidetes	Bacteroidales	Porphyromonadaceae	Dysgonomonas
1	ICF_094	HCF_053	ICF	Immigrans	Wild	Fruit	Guts	Bacteroidetes	Bacteroidetes	Bacteroidales	Porphyromonadaceae	Dysgonomonas
1	IMH_049	IMH_049	IMH	Immigrans	Wild	Flower	Bodies	Bacteroidetes	Flavobacteria	Flavobacteriales	Flavobacteriaceae	Flavobacterium
1	ICF_053	ICF_053	ICF	Immigrans	Wild	Fruit	Guts	Proteobacteria	Betaproteobacteria	Burkholderiales	Alcaligenaceae	Kerstersia
1	ICF_004	ICF_062	ICF	Immigrans	Wild	Fruit	Guts	Proteobacteria	Gammaproteobacteria	Enterobacteriales	Enterobacteriaceae	Morganella
1	ICF_033	ICF_062	ICF	Immigrans	Wild	Fruit	Guts	Proteobacteria	Gammaproteobacteria	Enterobacteriales	Enterobacteriaceae	Morganella
1	ICF_055	ICF_062	ICF	Immigrans	Wild	Fruit	Guts	Proteobacteria	Gammaproteobacteria	Enterobacteriales	Enterobacteriaceae	Morganella
1	ICF_062	ICF_062	ICF	Immigrans	Wild	Fruit	Guts	Proteobacteria	Gammaproteobacteria	Enterobacteriales	Enterobacteriaceae	Morganella
1	ICF_071	ICF_062	ICF	Immigrans	Wild	Fruit	Guts	Proteobacteria	Gammaproteobacteria	Enterobacteriales	Enterobacteriaceae	Morganella
1	ICF_077	ICF_062	ICF	Immigrans	Wild	Fruit	Guts	Proteobacteria	Gammaproteobacteria	Enterobacteriales	Enterobacteriaceae	Morganella
1	ICF_088	ICF_062	ICF	Immigrans	Wild	Fruit	Guts	Proteobacteria	Gammaproteobacteria	Enterobacteriales	Enterobacteriaceae	Morganella
1	ICF_006	XYM_085	ICF	Immigrans	Wild	Fruit	Guts	Proteobacteria	Gammaproteobacteria	Enterobacteriales	Enterobacteriaceae	Providencia
1	ICF_007	XYM_085	ICF	Immigrans	Wild	Fruit	Guts	Proteobacteria	Gammaproteobacteria	Enterobacteriales	Enterobacteriaceae	Providencia
1	ICF_008	XYM_085	ICF	Immigrans	Wild	Fruit	Guts	Proteobacteria	Gammaproteobacteria	Enterobacteriales	Enterobacteriaceae	Providencia
1	ICF_014	XYM_085	ICF	Immigrans	Wild	Fruit	Guts	Proteobacteria	Gammaproteobacteria	Enterobacteriales	Enterobacteriaceae	Providencia
1	ICF_016	XYM_085	ICF	Immigrans	Wild	Fruit	Guts	Proteobacteria	Gammaproteobacteria	Enterobacteriales	Enterobacteriaceae	Providencia
1	ICF_020	XYM_085	ICF	Immigrans	Wild	Fruit	Guts	Proteobacteria	Gammaproteobacteria	Enterobacteriales	Enterobacteriaceae	Providencia
1	ICF_022	XYM_085	ICF	Immigrans	Wild	Fruit	Guts	Proteobacteria	Gammaproteobacteria	Enterobacteriales	Enterobacteriaceae	Providencia
1	ICF_025	XYM_085	ICF	Immigrans	Wild	Fruit	Guts	Proteobacteria	Gammaproteobacteria	Enterobacteriales	Enterobacteriaceae	Providencia
1	ICF_054	XYM_085	ICF	Immigrans	Wild	Fruit	Guts	Proteobacteria	Gammaproteobacteria	Enterobacteriales	Enterobacteriaceae	Providencia
1	ICF_067	XYM_085	ICF	Immigrans	Wild	Fruit	Guts	Proteobacteria	Gammaproteobacteria	Enterobacteriales	Enterobacteriaceae	Providencia
1	ICF_072	XYM_085	ICF	Immigrans	Wild	Fruit	Guts	Proteobacteria	Gammaproteobacteria	Enterobacteriales	Enterobacteriaceae	Providencia
1	ICF_076	XYM_085	ICF	Immigrans	Wild	Fruit	Guts	Proteobacteria	Gammaproteobacteria	Enterobacteriales	Enterobacteriaceae	Providencia
1	ICF_080	XYM_085	ICF	Immigrans	Wild	Fruit	Guts	Proteobacteria	Gammaproteobacteria	Enterobacteriales	Enterobacteriaceae	Providencia
1	ICF_082	XYM_085	ICF	Immigrans	Wild	Fruit	Guts	Proteobacteria	Gammaproteobacteria	Enterobacteriales	Enterobacteriaceae	Providencia
1	ICF_092	XYM_085	ICF	Immigrans	Wild	Fruit	Guts	Proteobacteria	Gammaproteobacteria	Enterobacteriales	Enterobacteriaceae	Providencia
1	ICF_096	XYM_085	ICF	Immigrans	Wild	Fruit	Guts	Proteobacteria	Gammaproteobacteria	Enterobacteriales	Enterobacteriaceae	Providencia
1	IMH_033	XYX_081	IMH	Immigrans	Wild	Flower	Bodies	Proteobacteria	Gammaproteobacteria	Enterobacteriales	Enterobacteriaceae	Serratia
1	ICF_070	ICF_070	ICF	Immigrans	Wild	Fruit	Guts	Proteobacteria	Gammaproteobacteria	Enterobacteriales	Enterobacteriaceae	Unclassified_Enterobacteriaceae
1	ICF_021	FLV_010	ICF	Immigrans	Wild	Fruit	Guts	Proteobacteria	Gammaproteobacteria	Enterobacteriales	Enterobacteriaceae	Erwinia
1	ICF_046	FLV_010	ICF	Immigrans	Wild	Fruit	Guts	Proteobacteria	Gammaproteobacteria	Enterobacteriales	Enterobacteriaceae	Erwinia
1	IMH_032	FLV_010	IMH	Immigrans	Wild	Flower	Bodies	Proteobacteria	Gammaproteobacteria	Enterobacteriales	Enterobacteriaceae	Erwinia
1	IMH_054	FLV_010	IMH	Immigrans	Wild	Flower	Bodies	Proteobacteria	Gammaproteobacteria	Enterobacteriales	Enterobacteriaceae	Erwinia
1	ICF_018	FNS_026	ICF	Immigrans	Wild	Fruit	Guts	Proteobacteria	Gammaproteobacteria	Enterobacteriales	Enterobacteriaceae	Unclassified_Enterobacteriaceae
1	ICF_024	FNS_026	ICF	Immigrans	Wild	Fruit	Guts	Proteobacteria	Gammaproteobacteria	Enterobacteriales	Enterobacteriaceae	Unclassified_Enterobacteriaceae
1	IMH_036	ELD_039	IMH	Immigrans	Wild	Flower	Bodies	Proteobacteria	Gammaproteobacteria	Enterobacteriales	Enterobacteriaceae	Pantoea
1	IMH_065	ELD_039	IMH	Immigrans	Wild	Flower	Bodies	Proteobacteria	Gammaproteobacteria	Enterobacteriales	Enterobacteriaceae	Pantoea
1	IMH_071	ELD_039	IMH	Immigrans	Wild	Flower	Bodies	Proteobacteria	Gammaproteobacteria	Enterobacteriales	Enterobacteriaceae	Pantoea
1	IMH_001	IMH_035	IMH	Immigrans	Wild	Flower	Bodies	Proteobacteria	Gammaproteobacteria	Enterobacteriales	Enterobacteriaceae	Pantoea
1	IMH_002	IMH_035	IMH	Immigrans	Wild	Flower	Bodies	Proteobacteria	Gammaproteobacteria	Enterobacteriales	Enterobacteriaceae	Pantoea
1	IMH_003	IMH_035	IMH	Immigrans	Wild	Flower	Bodies	Proteobacteria	Gammaproteobacteria	Enterobacteriales	Enterobacteriaceae	Pantoea
1	IMH_004	IMH_035	IMH	Immigrans	Wild	Flower	Bodies	Proteobacteria	Gammaproteobacteria	Enterobacteriales	Enterobacteriaceae	Pantoea
1	IMH_005	IMH_035	IMH	Immigrans	Wild	Flower	Bodies	Proteobacteria	Gammaproteobacteria	Enterobacteriales	Enterobacteriaceae	Pantoea
1	IMH_007	IMH_035	IMH	Immigrans	Wild	Flower	Bodies	Proteobacteria	Gammaproteobacteria	Enterobacteriales	Enterobacteriaceae	Pantoea
1	IMH_008	IMH_035	IMH	Immigrans	Wild	Flower	Bodies	Proteobacteria	Gammaproteobacteria	Enterobacteriales	Enterobacteriaceae	Pantoea
1	IMH_010	IMH_035	IMH	Immigrans	Wild	Flower	Bodies	Proteobacteria	Gammaproteobacteria	Enterobacteriales	Enterobacteriaceae	Pantoea
1	IMH_011	IMH_035	IMH	Immigrans	Wild	Flower	Bodies	Proteobacteria	Gammaproteobacteria	Enterobacteriales	Enterobacteriaceae	Pantoea
1	IMH_013	IMH_035	IMH	Immigrans	Wild	Flower	Bodies	Proteobacteria	Gammaproteobacteria	Enterobacteriales	Enterobacteriaceae	Pantoea
1	IMH_014	IMH_035	IMH	Immigrans	Wild	Flower	Bodies	Proteobacteria	Gammaproteobacteria	Enterobacteriales	Enterobacteriaceae	Pantoea
1	IMH_018	IMH_035	IMH	Immigrans	Wild	Flower	Bodies	Proteobacteria	Gammaproteobacteria	Enterobacteriales	Enterobacteriaceae	Pantoea
1	IMH_019	IMH_035	IMH	Immigrans	Wild	Flower	Bodies	Proteobacteria	Gammaproteobacteria	Enterobacteriales	Enterobacteriaceae	Pantoea
1	IMH_022	IMH_035	IMH	Immigrans	Wild	Flower	Bodies	Proteobacteria	Gammaproteobacteria	Enterobacteriales	Enterobacteriaceae	Pantoea
1	IMH_023	IMH_035	IMH	Immigrans	Wild	Flower	Bodies	Proteobacteria	Gammaproteobacteria	Enterobacteriales	Enterobacteriaceae	Pantoea
1	IMH_028	IMH_035	IMH	Immigrans	Wild	Flower	Bodies	Proteobacteria	Gammaproteobacteria	Enterobacteriales	Enterobacteriaceae	Pantoea
1	IMH_031	IMH_035	IMH	Immigrans	Wild	Flower	Bodies	Proteobacteria	Gammaproteobacteria	Enterobacteriales	Enterobacteriaceae	Pantoea
1	IMH_035	IMH_035	IMH	Immigrans	Wild	Flower	Bodies	Proteobacteria	Gammaproteobacteria	Enterobacteriales	Enterobacteriaceae	Pantoea
1	IMH_039	IMH_035	IMH	Immigrans	Wild	Flower	Bodies	Proteobacteria	Gammaproteobacteria	Enterobacteriales	Enterobacteriaceae	Pantoea
1	IMH_041	IMH_035	IMH	Immigrans	Wild	Flower	Bodies	Proteobacteria	Gammaproteobacteria	Enterobacteriales	Enterobacteriaceae	Pantoea
1	IMH_044	IMH_035	IMH	Immigrans	Wild	Flower	Bodies	Proteobacteria	Gammaproteobacteria	Enterobacteriales	Enterobacteriaceae	Pantoea
1	IMH_047	IMH_035	IMH	Immigrans	Wild	Flower	Bodies	Proteobacteria	Gammaproteobacteria	Enterobacteriales	Enterobacteriaceae	Pantoea
1	IMH_055	IMH_035	IMH	Immigrans	Wild	Flower	Bodies	Proteobacteria	Gammaproteobacteria	Enterobacteriales	Enterobacteriaceae	Pantoea
1	IMH_060	IMH_035	IMH	Immigrans	Wild	Flower	Bodies	Proteobacteria	Gammaproteobacteria	Enterobacteriales	Enterobacteriaceae	Pantoea
1	IMH_067	IMH_035	IMH	Immigrans	Wild	Flower	Bodies	Proteobacteria	Gammaproteobacteria	Enterobacteriales	Enterobacteriaceae	Pantoea
1	IMH_072	IMH_035	IMH	Immigrans	Wild	Flower	Bodies	Proteobacteria	Gammaproteobacteria	Enterobacteriales	Enterobacteriaceae	Pantoea
1	IMH_073	IMH_035	IMH	Immigrans	Wild	Flower	Bodies	Proteobacteria	Gammaproteobacteria	Enterobacteriales	Enterobacteriaceae	Pantoea
1	IMH_074	IMH_035	IMH	Immigrans	Wild	Flower	Bodies	Proteobacteria	Gammaproteobacteria	Enterobacteriales	Enterobacteriaceae	Pantoea
1	IMH_078	IMH_035	IMH	Immigrans	Wild	Flower	Bodies	Proteobacteria	Gammaproteobacteria	Enterobacteriales	Enterobacteriaceae	Pantoea
1	IMH_079	IMH_035	IMH	Immigrans	Wild	Flower	Bodies	Proteobacteria	Gammaproteobacteria	Enterobacteriales	Enterobacteriaceae	Pantoea
1	IMH_082	IMH_035	IMH	Immigrans	Wild	Flower	Bodies	Proteobacteria	Gammaproteobacteria	Enterobacteriales	Enterobacteriaceae	Pantoea
1	IMH_084	IMH_035	IMH	Immigrans	Wild	Flower	Bodies	Proteobacteria	Gammaproteobacteria	Enterobacteriales	Enterobacteriaceae	Pantoea
1	IMH_085	IMH_035	IMH	Immigrans	Wild	Flower	Bodies	Proteobacteria	Gammaproteobacteria	Enterobacteriales	Enterobacteriaceae	Pantoea
1	IMH_089	IMH_035	IMH	Immigrans	Wild	Flower	Bodies	Proteobacteria	Gammaproteobacteria	Enterobacteriales	Enterobacteriaceae	Pantoea
1	IMH_091	IMH_035	IMH	Immigrans	Wild	Flower	Bodies	Proteobacteria	Gammaproteobacteria	Enterobacteriales	Enterobacteriaceae	Pantoea
1	ICF_078	ICF_078	ICF	Immigrans	Wild	Fruit	Guts	Proteobacteria	Gammaproteobacteria	Enterobacteriales	Enterobacteriaceae	Enterobacteriaceae Group Orbus
1	ICF_001	HCF_018	ICF	Immigrans	Wild	Fruit	Guts	Proteobacteria	Gammaproteobacteria	Enterobacteriales	Enterobacteriaceae	Enterobacteriaceae Group Orbus
1	ICF_002	HCF_018	ICF	Immigrans	Wild	Fruit	Guts	Proteobacteria	Gammaproteobacteria	Enterobacteriales	Enterobacteriaceae	Enterobacteriaceae Group Orbus
1	ICF_003	HCF_018	ICF	Immigrans	Wild	Fruit	Guts	Proteobacteria	Gammaproteobacteria	Enterobacteriales	Enterobacteriaceae	Enterobacteriaceae Group Orbus
1	ICF_005	HCF_018	ICF	Immigrans	Wild	Fruit	Guts	Proteobacteria	Gammaproteobacteria	Enterobacteriales	Enterobacteriaceae	Enterobacteriaceae Group Orbus
1	ICF_009	HCF_018	ICF	Immigrans	Wild	Fruit	Guts	Proteobacteria	Gammaproteobacteria	Enterobacteriales	Enterobacteriaceae	Enterobacteriaceae Group Orbus
1	ICF_010	HCF_018	ICF	Immigrans	Wild	Fruit	Guts	Proteobacteria	Gammaproteobacteria	Enterobacteriales	Enterobacteriaceae	Enterobacteriaceae Group Orbus
1	ICF_011	HCF_018	ICF	Immigrans	Wild	Fruit	Guts	Proteobacteria	Gammaproteobacteria	Enterobacteriales	Enterobacteriaceae	Enterobacteriaceae Group Orbus
1	ICF_012	HCF_018	ICF	Immigrans	Wild	Fruit	Guts	Proteobacteria	Gammaproteobacteria	Enterobacteriales	Enterobacteriaceae	Enterobacteriaceae Group Orbus
1	ICF_013	HCF_018	ICF	Immigrans	Wild	Fruit	Guts	Proteobacteria	Gammaproteobacteria	Enterobacteriales	Enterobacteriaceae	Enterobacteriaceae Group Orbus
1	ICF_017	HCF_018	ICF	Immigrans	Wild	Fruit	Guts	Proteobacteria	Gammaproteobacteria	Enterobacteriales	Enterobacteriaceae	Enterobacteriaceae Group Orbus
1	ICF_019	HCF_018	ICF	Immigrans	Wild	Fruit	Guts	Proteobacteria	Gammaproteobacteria	Enterobacteriales	Enterobacteriaceae	Enterobacteriaceae Group Orbus
1	ICF_023	HCF_018	ICF	Immigrans	Wild	Fruit	Guts	Proteobacteria	Gammaproteobacteria	Enterobacteriales	Enterobacteriaceae	Enterobacteriaceae Group Orbus
1	ICF_026	HCF_018	ICF	Immigrans	Wild	Fruit	Guts	Proteobacteria	Gammaproteobacteria	Enterobacteriales	Enterobacteriaceae	Enterobacteriaceae Group Orbus
1	ICF_027	HCF_018	ICF	Immigrans	Wild	Fruit	Guts	Proteobacteria	Gammaproteobacteria	Enterobacteriales	Enterobacteriaceae	Enterobacteriaceae Group Orbus
1	ICF_028	HCF_018	ICF	Immigrans	Wild	Fruit	Guts	Proteobacteria	Gammaproteobacteria	Enterobacteriales	Enterobacteriaceae	Enterobacteriaceae Group Orbus
1	ICF_029	HCF_018	ICF	Immigrans	Wild	Fruit	Guts	Proteobacteria	Gammaproteobacteria	Enterobacteriales	Enterobacteriaceae	Enterobacteriaceae Group Orbus
1	ICF_030	HCF_018	ICF	Immigrans	Wild	Fruit	Guts	Proteobacteria	Gammaproteobacteria	Enterobacteriales	Enterobacteriaceae	Enterobacteriaceae Group Orbus
1	ICF_031	HCF_018	ICF	Immigrans	Wild	Fruit	Guts	Proteobacteria	Gammaproteobacteria	Enterobacteriales	Enterobacteriaceae	Enterobacteriaceae Group Orbus
1	ICF_034	HCF_018	ICF	Immigrans	Wild	Fruit	Guts	Proteobacteria	Gammaproteobacteria	Enterobacteriales	Enterobacteriaceae	Enterobacteriaceae Group Orbus
1	ICF_036	HCF_018	ICF	Immigrans	Wild	Fruit	Guts	Proteobacteria	Gammaproteobacteria	Enterobacteriales	Enterobacteriaceae	Enterobacteriaceae Group Orbus
1	ICF_037	HCF_018	ICF	Immigrans	Wild	Fruit	Guts	Proteobacteria	Gammaproteobacteria	Enterobacteriales	Enterobacteriaceae	Enterobacteriaceae Group Orbus
1	ICF_038	HCF_018	ICF	Immigrans	Wild	Fruit	Guts	Proteobacteria	Gammaproteobacteria	Enterobacteriales	Enterobacteriaceae	Enterobacteriaceae Group Orbus
1	ICF_040	HCF_018	ICF	Immigrans	Wild	Fruit	Guts	Proteobacteria	Gammaproteobacteria	Enterobacteriales	Enterobacteriaceae	Enterobacteriaceae Group Orbus
1	ICF_041	HCF_018	ICF	Immigrans	Wild	Fruit	Guts	Proteobacteria	Gammaproteobacteria	Enterobacteriales	Enterobacteriaceae	Enterobacteriaceae Group Orbus
1	ICF_042	HCF_018	ICF	Immigrans	Wild	Fruit	Guts	Proteobacteria	Gammaproteobacteria	Enterobacteriales	Enterobacteriaceae	Enterobacteriaceae Group Orbus
1	ICF_043	HCF_018	ICF	Immigrans	Wild	Fruit	Guts	Proteobacteria	Gammaproteobacteria	Enterobacteriales	Enterobacteriaceae	Enterobacteriaceae Group Orbus
1	ICF_044	HCF_018	ICF	Immigrans	Wild	Fruit	Guts	Proteobacteria	Gammaproteobacteria	Enterobacteriales	Enterobacteriaceae	Enterobacteriaceae Group Orbus
1	ICF_047	HCF_018	ICF	Immigrans	Wild	Fruit	Guts	Proteobacteria	Gammaproteobacteria	Enterobacteriales	Enterobacteriaceae	Enterobacteriaceae Group Orbus
1	ICF_049	HCF_018	ICF	Immigrans	Wild	Fruit	Guts	Proteobacteria	Gammaproteobacteria	Enterobacteriales	Enterobacteriaceae	Enterobacteriaceae Group Orbus
1	ICF_050	HCF_018	ICF	Immigrans	Wild	Fruit	Guts	Proteobacteria	Gammaproteobacteria	Enterobacteriales	Enterobacteriaceae	Enterobacteriaceae Group Orbus
1	ICF_056	HCF_018	ICF	Immigrans	Wild	Fruit	Guts	Proteobacteria	Gammaproteobacteria	Enterobacteriales	Enterobacteriaceae	Enterobacteriaceae Group Orbus
1	ICF_057	HCF_018	ICF	Immigrans	Wild	Fruit	Guts	Proteobacteria	Gammaproteobacteria	Enterobacteriales	Enterobacteriaceae	Enterobacteriaceae Group Orbus
1	ICF_059	HCF_018	ICF	Immigrans	Wild	Fruit	Guts	Proteobacteria	Gammaproteobacteria	Enterobacteriales	Enterobacteriaceae	Enterobacteriaceae Group Orbus
1	ICF_060	HCF_018	ICF	Immigrans	Wild	Fruit	Guts	Proteobacteria	Gammaproteobacteria	Enterobacteriales	Enterobacteriaceae	Enterobacteriaceae Group Orbus
1	ICF_061	HCF_018	ICF	Immigrans	Wild	Fruit	Guts	Proteobacteria	Gammaproteobacteria	Enterobacteriales	Enterobacteriaceae	Enterobacteriaceae Group Orbus
1	ICF_063	HCF_018	ICF	Immigrans	Wild	Fruit	Guts	Proteobacteria	Gammaproteobacteria	Enterobacteriales	Enterobacteriaceae	Enterobacteriaceae Group Orbus
1	ICF_064	HCF_018	ICF	Immigrans	Wild	Fruit	Guts	Proteobacteria	Gammaproteobacteria	Enterobacteriales	Enterobacteriaceae	Enterobacteriaceae Group Orbus
1	ICF_065	HCF_018	ICF	Immigrans	Wild	Fruit	Guts	Proteobacteria	Gammaproteobacteria	Enterobacteriales	Enterobacteriaceae	Enterobacteriaceae Group Orbus
1	ICF_066	HCF_018	ICF	Immigrans	Wild	Fruit	Guts	Proteobacteria	Gammaproteobacteria	Enterobacteriales	Enterobacteriaceae	Enterobacteriaceae Group Orbus
1	ICF_068	HCF_018	ICF	Immigrans	Wild	Fruit	Guts	Proteobacteria	Gammaproteobacteria	Enterobacteriales	Enterobacteriaceae	Enterobacteriaceae Group Orbus
1	ICF_069	HCF_018	ICF	Immigrans	Wild	Fruit	Guts	Proteobacteria	Gammaproteobacteria	Enterobacteriales	Enterobacteriaceae	Enterobacteriaceae Group Orbus
1	ICF_073	HCF_018	ICF	Immigrans	Wild	Fruit	Guts	Proteobacteria	Gammaproteobacteria	Enterobacteriales	Enterobacteriaceae	Enterobacteriaceae Group Orbus
1	ICF_074	HCF_018	ICF	Immigrans	Wild	Fruit	Guts	Proteobacteria	Gammaproteobacteria	Enterobacteriales	Enterobacteriaceae	Enterobacteriaceae Group Orbus
1	ICF_075	HCF_018	ICF	Immigrans	Wild	Fruit	Guts	Proteobacteria	Gammaproteobacteria	Enterobacteriales	Enterobacteriaceae	Enterobacteriaceae Group Orbus
1	ICF_081	HCF_018	ICF	Immigrans	Wild	Fruit	Guts	Proteobacteria	Gammaproteobacteria	Enterobacteriales	Enterobacteriaceae	Enterobacteriaceae Group Orbus
1	ICF_083	HCF_018	ICF	Immigrans	Wild	Fruit	Guts	Proteobacteria	Gammaproteobacteria	Enterobacteriales	Enterobacteriaceae	Enterobacteriaceae Group Orbus
1	ICF_084	HCF_018	ICF	Immigrans	Wild	Fruit	Guts	Proteobacteria	Gammaproteobacteria	Enterobacteriales	Enterobacteriaceae	Enterobacteriaceae Group Orbus
1	ICF_085	HCF_018	ICF	Immigrans	Wild	Fruit	Guts	Proteobacteria	Gammaproteobacteria	Enterobacteriales	Enterobacteriaceae	Enterobacteriaceae Group Orbus
1	ICF_086	HCF_018	ICF	Immigrans	Wild	Fruit	Guts	Proteobacteria	Gammaproteobacteria	Enterobacteriales	Enterobacteriaceae	Enterobacteriaceae Group Orbus
1	ICF_087	HCF_018	ICF	Immigrans	Wild	Fruit	Guts	Proteobacteria	Gammaproteobacteria	Enterobacteriales	Enterobacteriaceae	Enterobacteriaceae Group Orbus
1	ICF_089	HCF_018	ICF	Immigrans	Wild	Fruit	Guts	Proteobacteria	Gammaproteobacteria	Enterobacteriales	Enterobacteriaceae	Enterobacteriaceae Group Orbus
1	ICF_090	HCF_018	ICF	Immigrans	Wild	Fruit	Guts	Proteobacteria	Gammaproteobacteria	Enterobacteriales	Enterobacteriaceae	Enterobacteriaceae Group Orbus
1	ICF_091	HCF_018	ICF	Immigrans	Wild	Fruit	Guts	Proteobacteria	Gammaproteobacteria	Enterobacteriales	Enterobacteriaceae	Enterobacteriaceae Group Orbus
1	ICF_093	HCF_018	ICF	Immigrans	Wild	Fruit	Guts	Proteobacteria	Gammaproteobacteria	Enterobacteriales	Enterobacteriaceae	Enterobacteriaceae Group Orbus
1	ICF_095	HCF_018	ICF	Immigrans	Wild	Fruit	Guts	Proteobacteria	Gammaproteobacteria	Enterobacteriales	Enterobacteriaceae	Enterobacteriaceae Group Orbus
1	IMH_009	HCF_018	IMH	Immigrans	Wild	Flower	Bodies	Proteobacteria	Gammaproteobacteria	Enterobacteriales	Enterobacteriaceae	Enterobacteriaceae Group Orbus
1	IMH_012	HCF_018	IMH	Immigrans	Wild	Flower	Bodies	Proteobacteria	Gammaproteobacteria	Enterobacteriales	Enterobacteriaceae	Enterobacteriaceae Group Orbus
1	IMH_015	HCF_018	IMH	Immigrans	Wild	Flower	Bodies	Proteobacteria	Gammaproteobacteria	Enterobacteriales	Enterobacteriaceae	Enterobacteriaceae Group Orbus
1	IMH_016	HCF_018	IMH	Immigrans	Wild	Flower	Bodies	Proteobacteria	Gammaproteobacteria	Enterobacteriales	Enterobacteriaceae	Enterobacteriaceae Group Orbus
1	IMH_017	HCF_018	IMH	Immigrans	Wild	Flower	Bodies	Proteobacteria	Gammaproteobacteria	Enterobacteriales	Enterobacteriaceae	Enterobacteriaceae Group Orbus
1	IMH_020	HCF_018	IMH	Immigrans	Wild	Flower	Bodies	Proteobacteria	Gammaproteobacteria	Enterobacteriales	Enterobacteriaceae	Enterobacteriaceae Group Orbus
1	IMH_021	HCF_018	IMH	Immigrans	Wild	Flower	Bodies	Proteobacteria	Gammaproteobacteria	Enterobacteriales	Enterobacteriaceae	Enterobacteriaceae Group Orbus
1	IMH_024	HCF_018	IMH	Immigrans	Wild	Flower	Bodies	Proteobacteria	Gammaproteobacteria	Enterobacteriales	Enterobacteriaceae	Enterobacteriaceae Group Orbus
1	IMH_025	HCF_018	IMH	Immigrans	Wild	Flower	Bodies	Proteobacteria	Gammaproteobacteria	Enterobacteriales	Enterobacteriaceae	Enterobacteriaceae Group Orbus
1	IMH_026	HCF_018	IMH	Immigrans	Wild	Flower	Bodies	Proteobacteria	Gammaproteobacteria	Enterobacteriales	Enterobacteriaceae	Enterobacteriaceae Group Orbus
1	IMH_027	HCF_018	IMH	Immigrans	Wild	Flower	Bodies	Proteobacteria	Gammaproteobacteria	Enterobacteriales	Enterobacteriaceae	Enterobacteriaceae Group Orbus
1	IMH_030	HCF_018	IMH	Immigrans	Wild	Flower	Bodies	Proteobacteria	Gammaproteobacteria	Enterobacteriales	Enterobacteriaceae	Enterobacteriaceae Group Orbus
1	IMH_034	HCF_018	IMH	Immigrans	Wild	Flower	Bodies	Proteobacteria	Gammaproteobacteria	Enterobacteriales	Enterobacteriaceae	Enterobacteriaceae Group Orbus
1	IMH_040	HCF_018	IMH	Immigrans	Wild	Flower	Bodies	Proteobacteria	Gammaproteobacteria	Enterobacteriales	Enterobacteriaceae	Enterobacteriaceae Group Orbus
1	IMH_042	HCF_018	IMH	Immigrans	Wild	Flower	Bodies	Proteobacteria	Gammaproteobacteria	Enterobacteriales	Enterobacteriaceae	Enterobacteriaceae Group Orbus
1	IMH_043	HCF_018	IMH	Immigrans	Wild	Flower	Bodies	Proteobacteria	Gammaproteobacteria	Enterobacteriales	Enterobacteriaceae	Enterobacteriaceae Group Orbus
1	IMH_045	HCF_018	IMH	Immigrans	Wild	Flower	Bodies	Proteobacteria	Gammaproteobacteria	Enterobacteriales	Enterobacteriaceae	Enterobacteriaceae Group Orbus
1	IMH_046	HCF_018	IMH	Immigrans	Wild	Flower	Bodies	Proteobacteria	Gammaproteobacteria	Enterobacteriales	Enterobacteriaceae	Enterobacteriaceae Group Orbus
1	IMH_048	HCF_018	IMH	Immigrans	Wild	Flower	Bodies	Proteobacteria	Gammaproteobacteria	Enterobacteriales	Enterobacteriaceae	Enterobacteriaceae Group Orbus
1	IMH_050	HCF_018	IMH	Immigrans	Wild	Flower	Bodies	Proteobacteria	Gammaproteobacteria	Enterobacteriales	Enterobacteriaceae	Enterobacteriaceae Group Orbus
1	IMH_051	HCF_018	IMH	Immigrans	Wild	Flower	Bodies	Proteobacteria	Gammaproteobacteria	Enterobacteriales	Enterobacteriaceae	Enterobacteriaceae Group Orbus
1	IMH_052	HCF_018	IMH	Immigrans	Wild	Flower	Bodies	Proteobacteria	Gammaproteobacteria	Enterobacteriales	Enterobacteriaceae	Enterobacteriaceae Group Orbus
1	IMH_053	HCF_018	IMH	Immigrans	Wild	Flower	Bodies	Proteobacteria	Gammaproteobacteria	Enterobacteriales	Enterobacteriaceae	Enterobacteriaceae Group Orbus
1	IMH_058	HCF_018	IMH	Immigrans	Wild	Flower	Bodies	Proteobacteria	Gammaproteobacteria	Enterobacteriales	Enterobacteriaceae	Enterobacteriaceae Group Orbus
1	IMH_059	HCF_018	IMH	Immigrans	Wild	Flower	Bodies	Proteobacteria	Gammaproteobacteria	Enterobacteriales	Enterobacteriaceae	Enterobacteriaceae Group Orbus
1	IMH_061	HCF_018	IMH	Immigrans	Wild	Flower	Bodies	Proteobacteria	Gammaproteobacteria	Enterobacteriales	Enterobacteriaceae	Enterobacteriaceae Group Orbus
1	IMH_062	HCF_018	IMH	Immigrans	Wild	Flower	Bodies	Proteobacteria	Gammaproteobacteria	Enterobacteriales	Enterobacteriaceae	Enterobacteriaceae Group Orbus
1	IMH_063	HCF_018	IMH	Immigrans	Wild	Flower	Bodies	Proteobacteria	Gammaproteobacteria	Enterobacteriales	Enterobacteriaceae	Enterobacteriaceae Group Orbus
1	IMH_066	HCF_018	IMH	Immigrans	Wild	Flower	Bodies	Proteobacteria	Gammaproteobacteria	Enterobacteriales	Enterobacteriaceae	Enterobacteriaceae Group Orbus
1	IMH_068	HCF_018	IMH	Immigrans	Wild	Flower	Bodies	Proteobacteria	Gammaproteobacteria	Enterobacteriales	Enterobacteriaceae	Enterobacteriaceae Group Orbus
1	IMH_069	HCF_018	IMH	Immigrans	Wild	Flower	Bodies	Proteobacteria	Gammaproteobacteria	Enterobacteriales	Enterobacteriaceae	Enterobacteriaceae Group Orbus
1	IMH_070	HCF_018	IMH	Immigrans	Wild	Flower	Bodies	Proteobacteria	Gammaproteobacteria	Enterobacteriales	Enterobacteriaceae	Enterobacteriaceae Group Orbus
1	IMH_075	HCF_018	IMH	Immigrans	Wild	Flower	Bodies	Proteobacteria	Gammaproteobacteria	Enterobacteriales	Enterobacteriaceae	Enterobacteriaceae Group Orbus
1	IMH_076	HCF_018	IMH	Immigrans	Wild	Flower	Bodies	Proteobacteria	Gammaproteobacteria	Enterobacteriales	Enterobacteriaceae	Enterobacteriaceae Group Orbus
1	IMH_077	HCF_018	IMH	Immigrans	Wild	Flower	Bodies	Proteobacteria	Gammaproteobacteria	Enterobacteriales	Enterobacteriaceae	Enterobacteriaceae Group Orbus
1	IMH_080	HCF_018	IMH	Immigrans	Wild	Flower	Bodies	Proteobacteria	Gammaproteobacteria	Enterobacteriales	Enterobacteriaceae	Enterobacteriaceae Group Orbus
1	IMH_081	HCF_018	IMH	Immigrans	Wild	Flower	Bodies	Proteobacteria	Gammaproteobacteria	Enterobacteriales	Enterobacteriaceae	Enterobacteriaceae Group Orbus
1	IMH_086	HCF_018	IMH	Immigrans	Wild	Flower	Bodies	Proteobacteria	Gammaproteobacteria	Enterobacteriales	Enterobacteriaceae	Enterobacteriaceae Group Orbus
1	IMH_087	HCF_018	IMH	Immigrans	Wild	Flower	Bodies	Proteobacteria	Gammaproteobacteria	Enterobacteriales	Enterobacteriaceae	Enterobacteriaceae Group Orbus
1	IMH_092	HCF_018	IMH	Immigrans	Wild	Flower	Bodies	Proteobacteria	Gammaproteobacteria	Enterobacteriales	Enterobacteriaceae	Enterobacteriaceae Group Orbus
1	IMH_093	HCF_018	IMH	Immigrans	Wild	Flower	Bodies	Proteobacteria	Gammaproteobacteria	Enterobacteriales	Enterobacteriaceae	Enterobacteriaceae Group Orbus
1	IMH_094	HCF_018	IMH	Immigrans	Wild	Flower	Bodies	Proteobacteria	Gammaproteobacteria	Enterobacteriales	Enterobacteriaceae	Enterobacteriaceae Group Orbus
1	IMH_095	HCF_018	IMH	Immigrans	Wild	Flower	Bodies	Proteobacteria	Gammaproteobacteria	Enterobacteriales	Enterobacteriaceae	Enterobacteriaceae Group Orbus
1	IMH_096	HCF_018	IMH	Immigrans	Wild	Flower	Bodies	Proteobacteria	Gammaproteobacteria	Enterobacteriales	Enterobacteriaceae	Enterobacteriaceae Group Orbus
1	IMH_006	IMH_006	IMH	Immigrans	Wild	Flower	Bodies	Firmicutes	Bacilli	Bacillales	Paenibacillaceae	Unclassified_Paenibacillaceae
1	ORM_004	MAW_008	ORM	melanogaster	Lab	Kimbrell	Guts	Proteobacteria	Alphaproteobacteria	Rhodospirillales	Acetobacteraceae	Acetobacter
1	ORM_044	MAW_008	ORM	melanogaster	Lab	Kimbrell	Guts	Proteobacteria	Alphaproteobacteria	Rhodospirillales	Acetobacteraceae	Acetobacter
1	ORM_058	MAW_008	ORM	melanogaster	Lab	Kimbrell	Guts	Proteobacteria	Alphaproteobacteria	Rhodospirillales	Acetobacteraceae	Acetobacter
1	MAW_005	MAW_008	MAW	melanogaster	Wild	Fruit	Bodies	Proteobacteria	Alphaproteobacteria	Rhodospirillales	Acetobacteraceae	Acetobacter
1	MAW_007	MAW_008	MAW	melanogaster	Wild	Fruit	Bodies	Proteobacteria	Alphaproteobacteria	Rhodospirillales	Acetobacteraceae	Acetobacter
1	MAW_008	MAW_008	MAW	melanogaster	Wild	Fruit	Bodies	Proteobacteria	Alphaproteobacteria	Rhodospirillales	Acetobacteraceae	Acetobacter
1	MAW_009	MAW_008	MAW	melanogaster	Wild	Fruit	Bodies	Proteobacteria	Alphaproteobacteria	Rhodospirillales	Acetobacteraceae	Acetobacter
1	MAW_017	MAW_008	MAW	melanogaster	Wild	Fruit	Bodies	Proteobacteria	Alphaproteobacteria	Rhodospirillales	Acetobacteraceae	Acetobacter
1	MAW_029	MAW_008	MAW	melanogaster	Wild	Fruit	Bodies	Proteobacteria	Alphaproteobacteria	Rhodospirillales	Acetobacteraceae	Acetobacter
1	MAW_041	MAW_008	MAW	melanogaster	Wild	Fruit	Bodies	Proteobacteria	Alphaproteobacteria	Rhodospirillales	Acetobacteraceae	Acetobacter
1	MAW_051	MAW_008	MAW	melanogaster	Wild	Fruit	Bodies	Proteobacteria	Alphaproteobacteria	Rhodospirillales	Acetobacteraceae	Acetobacter
1	MAW_069	MAW_008	MAW	melanogaster	Wild	Fruit	Bodies	Proteobacteria	Alphaproteobacteria	Rhodospirillales	Acetobacteraceae	Acetobacter
1	MAW_080	MAW_008	MAW	melanogaster	Wild	Fruit	Bodies	Proteobacteria	Alphaproteobacteria	Rhodospirillales	Acetobacteraceae	Acetobacter
1	TBB_351	MAW_008	TBB	melanogaster	Wild	Fruit	Guts	Proteobacteria	Alphaproteobacteria	Rhodospirillales	Acetobacteraceae	Acetobacter
1	ORM_080	TBB_298	ORM	melanogaster	Lab	Kimbrell	Guts	Proteobacteria	Alphaproteobacteria	Rhodospirillales	Acetobacteraceae	Acetobacter
1	ORM_021	TBB_298	ORM	melanogaster	Lab	Kimbrell	Guts	Proteobacteria	Alphaproteobacteria	Rhodospirillales	Acetobacteraceae	Acetobacter
1	ORM_012	TBB_298	ORM	melanogaster	Lab	Kimbrell	Guts	Proteobacteria	Alphaproteobacteria	Rhodospirillales	Acetobacteraceae	Acetobacter
1	ORM_096	TBB_298	ORM	melanogaster	Lab	Kimbrell	Guts	Proteobacteria	Alphaproteobacteria	Rhodospirillales	Acetobacteraceae	Acetobacter
1	ORM_078	TBB_298	ORM	melanogaster	Lab	Kimbrell	Guts	Proteobacteria	Alphaproteobacteria	Rhodospirillales	Acetobacteraceae	Acetobacter
1	ORM_069	TBB_298	ORM	melanogaster	Lab	Kimbrell	Guts	Proteobacteria	Alphaproteobacteria	Rhodospirillales	Acetobacteraceae	Acetobacter
1	WOE_010	TBB_298	WOE	melanogaster	Lab	Kopp	External	Proteobacteria	Alphaproteobacteria	Rhodospirillales	Acetobacteraceae	Acetobacter
1	WOE_030	TBB_298	WOE	melanogaster	Lab	Kopp	External	Proteobacteria	Alphaproteobacteria	Rhodospirillales	Acetobacteraceae	Acetobacter
1	WOE_040	TBB_298	WOE	melanogaster	Lab	Kopp	External	Proteobacteria	Alphaproteobacteria	Rhodospirillales	Acetobacteraceae	Acetobacter
1	WOE_070	TBB_298	WOE	melanogaster	Lab	Kopp	External	Proteobacteria	Alphaproteobacteria	Rhodospirillales	Acetobacteraceae	Acetobacter
1	WOE_080	TBB_298	WOE	melanogaster	Lab	Kopp	External	Proteobacteria	Alphaproteobacteria	Rhodospirillales	Acetobacteraceae	Acetobacter
1	WOE_001	TBB_298	WOE	melanogaster	Lab	Kopp	External	Proteobacteria	Alphaproteobacteria	Rhodospirillales	Acetobacteraceae	Acetobacter
1	WOE_041	TBB_298	WOE	melanogaster	Lab	Kopp	External	Proteobacteria	Alphaproteobacteria	Rhodospirillales	Acetobacteraceae	Acetobacter
1	WOE_082	TBB_298	WOE	melanogaster	Lab	Kopp	External	Proteobacteria	Alphaproteobacteria	Rhodospirillales	Acetobacteraceae	Acetobacter
1	WOE_013	TBB_298	WOE	melanogaster	Lab	Kopp	External	Proteobacteria	Alphaproteobacteria	Rhodospirillales	Acetobacteraceae	Acetobacter
1	WOE_033	TBB_298	WOE	melanogaster	Lab	Kopp	External	Proteobacteria	Alphaproteobacteria	Rhodospirillales	Acetobacteraceae	Acetobacter
1	WOE_083	TBB_298	WOE	melanogaster	Lab	Kopp	External	Proteobacteria	Alphaproteobacteria	Rhodospirillales	Acetobacteraceae	Acetobacter
1	WOE_024	TBB_298	WOE	melanogaster	Lab	Kopp	External	Proteobacteria	Alphaproteobacteria	Rhodospirillales	Acetobacteraceae	Acetobacter
1	WOE_005	TBB_298	WOE	melanogaster	Lab	Kopp	External	Proteobacteria	Alphaproteobacteria	Rhodospirillales	Acetobacteraceae	Acetobacter
1	WOE_065	TBB_298	WOE	melanogaster	Lab	Kopp	External	Proteobacteria	Alphaproteobacteria	Rhodospirillales	Acetobacteraceae	Acetobacter
1	WOE_056	TBB_298	WOE	melanogaster	Lab	Kopp	External	Proteobacteria	Alphaproteobacteria	Rhodospirillales	Acetobacteraceae	Acetobacter
1	WOE_086	TBB_298	WOE	melanogaster	Lab	Kopp	External	Proteobacteria	Alphaproteobacteria	Rhodospirillales	Acetobacteraceae	Acetobacter
1	WOE_096	TBB_298	WOE	melanogaster	Lab	Kopp	External	Proteobacteria	Alphaproteobacteria	Rhodospirillales	Acetobacteraceae	Acetobacter
1	WOE_037	TBB_298	WOE	melanogaster	Lab	Kopp	External	Proteobacteria	Alphaproteobacteria	Rhodospirillales	Acetobacteraceae	Acetobacter
1	WOE_087	TBB_298	WOE	melanogaster	Lab	Kopp	External	Proteobacteria	Alphaproteobacteria	Rhodospirillales	Acetobacteraceae	Acetobacter
1	WOE_038	TBB_298	WOE	melanogaster	Lab	Kopp	External	Proteobacteria	Alphaproteobacteria	Rhodospirillales	Acetobacteraceae	Acetobacter
1	WOE_078	TBB_298	WOE	melanogaster	Lab	Kopp	External	Proteobacteria	Alphaproteobacteria	Rhodospirillales	Acetobacteraceae	Acetobacter
1	WOE_088	TBB_298	WOE	melanogaster	Lab	Kopp	External	Proteobacteria	Alphaproteobacteria	Rhodospirillales	Acetobacteraceae	Acetobacter
1	WOE_009	TBB_298	WOE	melanogaster	Lab	Kopp	External	Proteobacteria	Alphaproteobacteria	Rhodospirillales	Acetobacteraceae	Acetobacter
1	WOE_039	TBB_298	WOE	melanogaster	Lab	Kopp	External	Proteobacteria	Alphaproteobacteria	Rhodospirillales	Acetobacteraceae	Acetobacter
1	WOP_050	TBB_298	WOP	melanogaster	Lab	Kopp	Pupae	Proteobacteria	Alphaproteobacteria	Rhodospirillales	Acetobacteraceae	Acetobacter
1	XDA_117	TBB_298	XDA	melanogaster	Lab	Kopp	Guts	Proteobacteria	Alphaproteobacteria	Rhodospirillales	Acetobacteraceae	Acetobacter
1	MAW_013	TBB_298	MAW	melanogaster	Wild	Fruit	Bodies	Proteobacteria	Alphaproteobacteria	Rhodospirillales	Acetobacteraceae	Acetobacter
1	MAW_019	TBB_298	MAW	melanogaster	Wild	Fruit	Bodies	Proteobacteria	Alphaproteobacteria	Rhodospirillales	Acetobacteraceae	Acetobacter
1	MAW_028	TBB_298	MAW	melanogaster	Wild	Fruit	Bodies	Proteobacteria	Alphaproteobacteria	Rhodospirillales	Acetobacteraceae	Acetobacter
1	MAW_038	TBB_298	MAW	melanogaster	Wild	Fruit	Bodies	Proteobacteria	Alphaproteobacteria	Rhodospirillales	Acetobacteraceae	Acetobacter
1	MAW_045	TBB_298	MAW	melanogaster	Wild	Fruit	Bodies	Proteobacteria	Alphaproteobacteria	Rhodospirillales	Acetobacteraceae	Acetobacter
1	MAW_046	TBB_298	MAW	melanogaster	Wild	Fruit	Bodies	Proteobacteria	Alphaproteobacteria	Rhodospirillales	Acetobacteraceae	Acetobacter
1	MAW_059	TBB_298	MAW	melanogaster	Wild	Fruit	Bodies	Proteobacteria	Alphaproteobacteria	Rhodospirillales	Acetobacteraceae	Acetobacter
1	MAW_060	TBB_298	MAW	melanogaster	Wild	Fruit	Bodies	Proteobacteria	Alphaproteobacteria	Rhodospirillales	Acetobacteraceae	Acetobacter
1	MAW_068	TBB_298	MAW	melanogaster	Wild	Fruit	Bodies	Proteobacteria	Alphaproteobacteria	Rhodospirillales	Acetobacteraceae	Acetobacter
1	MAW_094	TBB_298	MAW	melanogaster	Wild	Fruit	Bodies	Proteobacteria	Alphaproteobacteria	Rhodospirillales	Acetobacteraceae	Acetobacter
1	MAW_095	TBB_298	MAW	melanogaster	Wild	Fruit	Bodies	Proteobacteria	Alphaproteobacteria	Rhodospirillales	Acetobacteraceae	Acetobacter
1	TBB_056	TBB_298	TBB	melanogaster	Wild	Fruit	Guts	Proteobacteria	Alphaproteobacteria	Rhodospirillales	Acetobacteraceae	Acetobacter
1	TBB_096	TBB_298	TBB	melanogaster	Wild	Fruit	Guts	Proteobacteria	Alphaproteobacteria	Rhodospirillales	Acetobacteraceae	Acetobacter
1	TBB_099	TBB_298	TBB	melanogaster	Wild	Fruit	Guts	Proteobacteria	Alphaproteobacteria	Rhodospirillales	Acetobacteraceae	Acetobacter
1	TBB_100	TBB_298	TBB	melanogaster	Wild	Fruit	Guts	Proteobacteria	Alphaproteobacteria	Rhodospirillales	Acetobacteraceae	Acetobacter
1	TBB_101	TBB_298	TBB	melanogaster	Wild	Fruit	Guts	Proteobacteria	Alphaproteobacteria	Rhodospirillales	Acetobacteraceae	Acetobacter
1	TBB_104	TBB_298	TBB	melanogaster	Wild	Fruit	Guts	Proteobacteria	Alphaproteobacteria	Rhodospirillales	Acetobacteraceae	Acetobacter
1	TBB_106	TBB_298	TBB	melanogaster	Wild	Fruit	Guts	Proteobacteria	Alphaproteobacteria	Rhodospirillales	Acetobacteraceae	Acetobacter
1	TBB_108	TBB_298	TBB	melanogaster	Wild	Fruit	Guts	Proteobacteria	Alphaproteobacteria	Rhodospirillales	Acetobacteraceae	Acetobacter
1	TBB_110	TBB_298	TBB	melanogaster	Wild	Fruit	Guts	Proteobacteria	Alphaproteobacteria	Rhodospirillales	Acetobacteraceae	Acetobacter
1	TBB_115	TBB_298	TBB	melanogaster	Wild	Fruit	Guts	Proteobacteria	Alphaproteobacteria	Rhodospirillales	Acetobacteraceae	Acetobacter
1	TBB_116	TBB_298	TBB	melanogaster	Wild	Fruit	Guts	Proteobacteria	Alphaproteobacteria	Rhodospirillales	Acetobacteraceae	Acetobacter
1	TBB_117	TBB_298	TBB	melanogaster	Wild	Fruit	Guts	Proteobacteria	Alphaproteobacteria	Rhodospirillales	Acetobacteraceae	Acetobacter
1	TBB_118	TBB_298	TBB	melanogaster	Wild	Fruit	Guts	Proteobacteria	Alphaproteobacteria	Rhodospirillales	Acetobacteraceae	Acetobacter
1	TBB_119	TBB_298	TBB	melanogaster	Wild	Fruit	Guts	Proteobacteria	Alphaproteobacteria	Rhodospirillales	Acetobacteraceae	Acetobacter
1	TBB_121	TBB_298	TBB	melanogaster	Wild	Fruit	Guts	Proteobacteria	Alphaproteobacteria	Rhodospirillales	Acetobacteraceae	Acetobacter
1	TBB_123	TBB_298	TBB	melanogaster	Wild	Fruit	Guts	Proteobacteria	Alphaproteobacteria	Rhodospirillales	Acetobacteraceae	Acetobacter
1	TBB_124	TBB_298	TBB	melanogaster	Wild	Fruit	Guts	Proteobacteria	Alphaproteobacteria	Rhodospirillales	Acetobacteraceae	Acetobacter
1	TBB_125	TBB_298	TBB	melanogaster	Wild	Fruit	Guts	Proteobacteria	Alphaproteobacteria	Rhodospirillales	Acetobacteraceae	Acetobacter
1	TBB_127	TBB_298	TBB	melanogaster	Wild	Fruit	Guts	Proteobacteria	Alphaproteobacteria	Rhodospirillales	Acetobacteraceae	Acetobacter
1	TBB_128	TBB_298	TBB	melanogaster	Wild	Fruit	Guts	Proteobacteria	Alphaproteobacteria	Rhodospirillales	Acetobacteraceae	Acetobacter
1	TBB_133	TBB_298	TBB	melanogaster	Wild	Fruit	Guts	Proteobacteria	Alphaproteobacteria	Rhodospirillales	Acetobacteraceae	Acetobacter
1	TBB_134	TBB_298	TBB	melanogaster	Wild	Fruit	Guts	Proteobacteria	Alphaproteobacteria	Rhodospirillales	Acetobacteraceae	Acetobacter
1	TBB_138	TBB_298	TBB	melanogaster	Wild	Fruit	Guts	Proteobacteria	Alphaproteobacteria	Rhodospirillales	Acetobacteraceae	Acetobacter
1	TBB_139	TBB_298	TBB	melanogaster	Wild	Fruit	Guts	Proteobacteria	Alphaproteobacteria	Rhodospirillales	Acetobacteraceae	Acetobacter
1	TBB_141	TBB_298	TBB	melanogaster	Wild	Fruit	Guts	Proteobacteria	Alphaproteobacteria	Rhodospirillales	Acetobacteraceae	Acetobacter
1	TBB_143	TBB_298	TBB	melanogaster	Wild	Fruit	Guts	Proteobacteria	Alphaproteobacteria	Rhodospirillales	Acetobacteraceae	Acetobacter
1	TBB_144	TBB_298	TBB	melanogaster	Wild	Fruit	Guts	Proteobacteria	Alphaproteobacteria	Rhodospirillales	Acetobacteraceae	Acetobacter
1	TBB_145	TBB_298	TBB	melanogaster	Wild	Fruit	Guts	Proteobacteria	Alphaproteobacteria	Rhodospirillales	Acetobacteraceae	Acetobacter
1	TBB_148	TBB_298	TBB	melanogaster	Wild	Fruit	Guts	Proteobacteria	Alphaproteobacteria	Rhodospirillales	Acetobacteraceae	Acetobacter
1	TBB_151	TBB_298	TBB	melanogaster	Wild	Fruit	Guts	Proteobacteria	Alphaproteobacteria	Rhodospirillales	Acetobacteraceae	Acetobacter
1	TBB_153	TBB_298	TBB	melanogaster	Wild	Fruit	Guts	Proteobacteria	Alphaproteobacteria	Rhodospirillales	Acetobacteraceae	Acetobacter
1	TBB_155	TBB_298	TBB	melanogaster	Wild	Fruit	Guts	Proteobacteria	Alphaproteobacteria	Rhodospirillales	Acetobacteraceae	Acetobacter
1	TBB_156	TBB_298	TBB	melanogaster	Wild	Fruit	Guts	Proteobacteria	Alphaproteobacteria	Rhodospirillales	Acetobacteraceae	Acetobacter
1	TBB_160	TBB_298	TBB	melanogaster	Wild	Fruit	Guts	Proteobacteria	Alphaproteobacteria	Rhodospirillales	Acetobacteraceae	Acetobacter
1	TBB_161	TBB_298	TBB	melanogaster	Wild	Fruit	Guts	Proteobacteria	Alphaproteobacteria	Rhodospirillales	Acetobacteraceae	Acetobacter
1	TBB_163	TBB_298	TBB	melanogaster	Wild	Fruit	Guts	Proteobacteria	Alphaproteobacteria	Rhodospirillales	Acetobacteraceae	Acetobacter
1	TBB_164	TBB_298	TBB	melanogaster	Wild	Fruit	Guts	Proteobacteria	Alphaproteobacteria	Rhodospirillales	Acetobacteraceae	Acetobacter
1	TBB_167	TBB_298	TBB	melanogaster	Wild	Fruit	Guts	Proteobacteria	Alphaproteobacteria	Rhodospirillales	Acetobacteraceae	Acetobacter
1	TBB_171	TBB_298	TBB	melanogaster	Wild	Fruit	Guts	Proteobacteria	Alphaproteobacteria	Rhodospirillales	Acetobacteraceae	Acetobacter
1	TBB_172	TBB_298	TBB	melanogaster	Wild	Fruit	Guts	Proteobacteria	Alphaproteobacteria	Rhodospirillales	Acetobacteraceae	Acetobacter
1	TBB_173	TBB_298	TBB	melanogaster	Wild	Fruit	Guts	Proteobacteria	Alphaproteobacteria	Rhodospirillales	Acetobacteraceae	Acetobacter
1	TBB_175	TBB_298	TBB	melanogaster	Wild	Fruit	Guts	Proteobacteria	Alphaproteobacteria	Rhodospirillales	Acetobacteraceae	Acetobacter
1	TBB_176	TBB_298	TBB	melanogaster	Wild	Fruit	Guts	Proteobacteria	Alphaproteobacteria	Rhodospirillales	Acetobacteraceae	Acetobacter
1	TBB_178	TBB_298	TBB	melanogaster	Wild	Fruit	Guts	Proteobacteria	Alphaproteobacteria	Rhodospirillales	Acetobacteraceae	Acetobacter
1	TBB_179	TBB_298	TBB	melanogaster	Wild	Fruit	Guts	Proteobacteria	Alphaproteobacteria	Rhodospirillales	Acetobacteraceae	Acetobacter
1	TBB_180	TBB_298	TBB	melanogaster	Wild	Fruit	Guts	Proteobacteria	Alphaproteobacteria	Rhodospirillales	Acetobacteraceae	Acetobacter
1	TBB_181	TBB_298	TBB	melanogaster	Wild	Fruit	Guts	Proteobacteria	Alphaproteobacteria	Rhodospirillales	Acetobacteraceae	Acetobacter
1	TBB_182	TBB_298	TBB	melanogaster	Wild	Fruit	Guts	Proteobacteria	Alphaproteobacteria	Rhodospirillales	Acetobacteraceae	Acetobacter
1	TBB_186	TBB_298	TBB	melanogaster	Wild	Fruit	Guts	Proteobacteria	Alphaproteobacteria	Rhodospirillales	Acetobacteraceae	Acetobacter
1	TBB_187	TBB_298	TBB	melanogaster	Wild	Fruit	Guts	Proteobacteria	Alphaproteobacteria	Rhodospirillales	Acetobacteraceae	Acetobacter
1	TBB_189	TBB_298	TBB	melanogaster	Wild	Fruit	Guts	Proteobacteria	Alphaproteobacteria	Rhodospirillales	Acetobacteraceae	Acetobacter
1	TBB_288	TBB_298	TBB	melanogaster	Wild	Fruit	Guts	Proteobacteria	Alphaproteobacteria	Rhodospirillales	Acetobacteraceae	Acetobacter
1	TBB_289	TBB_298	TBB	melanogaster	Wild	Fruit	Guts	Proteobacteria	Alphaproteobacteria	Rhodospirillales	Acetobacteraceae	Acetobacter
1	TBB_290	TBB_298	TBB	melanogaster	Wild	Fruit	Guts	Proteobacteria	Alphaproteobacteria	Rhodospirillales	Acetobacteraceae	Acetobacter
1	TBB_292	TBB_298	TBB	melanogaster	Wild	Fruit	Guts	Proteobacteria	Alphaproteobacteria	Rhodospirillales	Acetobacteraceae	Acetobacter
1	TBB_294	TBB_298	TBB	melanogaster	Wild	Fruit	Guts	Proteobacteria	Alphaproteobacteria	Rhodospirillales	Acetobacteraceae	Acetobacter
1	TBB_296	TBB_298	TBB	melanogaster	Wild	Fruit	Guts	Proteobacteria	Alphaproteobacteria	Rhodospirillales	Acetobacteraceae	Acetobacter
1	TBB_298	TBB_298	TBB	melanogaster	Wild	Fruit	Guts	Proteobacteria	Alphaproteobacteria	Rhodospirillales	Acetobacteraceae	Acetobacter
1	TBB_299	TBB_298	TBB	melanogaster	Wild	Fruit	Guts	Proteobacteria	Alphaproteobacteria	Rhodospirillales	Acetobacteraceae	Acetobacter
1	TBB_302	TBB_298	TBB	melanogaster	Wild	Fruit	Guts	Proteobacteria	Alphaproteobacteria	Rhodospirillales	Acetobacteraceae	Acetobacter
1	TBB_303	TBB_298	TBB	melanogaster	Wild	Fruit	Guts	Proteobacteria	Alphaproteobacteria	Rhodospirillales	Acetobacteraceae	Acetobacter
1	TBB_304	TBB_298	TBB	melanogaster	Wild	Fruit	Guts	Proteobacteria	Alphaproteobacteria	Rhodospirillales	Acetobacteraceae	Acetobacter
1	TBB_305	TBB_298	TBB	melanogaster	Wild	Fruit	Guts	Proteobacteria	Alphaproteobacteria	Rhodospirillales	Acetobacteraceae	Acetobacter
1	TBB_306	TBB_298	TBB	melanogaster	Wild	Fruit	Guts	Proteobacteria	Alphaproteobacteria	Rhodospirillales	Acetobacteraceae	Acetobacter
1	TBB_311	TBB_298	TBB	melanogaster	Wild	Fruit	Guts	Proteobacteria	Alphaproteobacteria	Rhodospirillales	Acetobacteraceae	Acetobacter
1	TBB_313	TBB_298	TBB	melanogaster	Wild	Fruit	Guts	Proteobacteria	Alphaproteobacteria	Rhodospirillales	Acetobacteraceae	Acetobacter
1	TBB_314	TBB_298	TBB	melanogaster	Wild	Fruit	Guts	Proteobacteria	Alphaproteobacteria	Rhodospirillales	Acetobacteraceae	Acetobacter
1	TBB_317	TBB_298	TBB	melanogaster	Wild	Fruit	Guts	Proteobacteria	Alphaproteobacteria	Rhodospirillales	Acetobacteraceae	Acetobacter
1	TBB_318	TBB_298	TBB	melanogaster	Wild	Fruit	Guts	Proteobacteria	Alphaproteobacteria	Rhodospirillales	Acetobacteraceae	Acetobacter
1	TBB_319	TBB_298	TBB	melanogaster	Wild	Fruit	Guts	Proteobacteria	Alphaproteobacteria	Rhodospirillales	Acetobacteraceae	Acetobacter
1	TBB_323	TBB_298	TBB	melanogaster	Wild	Fruit	Guts	Proteobacteria	Alphaproteobacteria	Rhodospirillales	Acetobacteraceae	Acetobacter
1	TBB_325	TBB_298	TBB	melanogaster	Wild	Fruit	Guts	Proteobacteria	Alphaproteobacteria	Rhodospirillales	Acetobacteraceae	Acetobacter
1	TBB_326	TBB_298	TBB	melanogaster	Wild	Fruit	Guts	Proteobacteria	Alphaproteobacteria	Rhodospirillales	Acetobacteraceae	Acetobacter
1	TBB_329	TBB_298	TBB	melanogaster	Wild	Fruit	Guts	Proteobacteria	Alphaproteobacteria	Rhodospirillales	Acetobacteraceae	Acetobacter
1	TBB_330	TBB_298	TBB	melanogaster	Wild	Fruit	Guts	Proteobacteria	Alphaproteobacteria	Rhodospirillales	Acetobacteraceae	Acetobacter
1	TBB_334	TBB_298	TBB	melanogaster	Wild	Fruit	Guts	Proteobacteria	Alphaproteobacteria	Rhodospirillales	Acetobacteraceae	Acetobacter
1	TBB_335	TBB_298	TBB	melanogaster	Wild	Fruit	Guts	Proteobacteria	Alphaproteobacteria	Rhodospirillales	Acetobacteraceae	Acetobacter
1	TBB_337	TBB_298	TBB	melanogaster	Wild	Fruit	Guts	Proteobacteria	Alphaproteobacteria	Rhodospirillales	Acetobacteraceae	Acetobacter
1	TBB_341	TBB_298	TBB	melanogaster	Wild	Fruit	Guts	Proteobacteria	Alphaproteobacteria	Rhodospirillales	Acetobacteraceae	Acetobacter
1	TBB_342	TBB_298	TBB	melanogaster	Wild	Fruit	Guts	Proteobacteria	Alphaproteobacteria	Rhodospirillales	Acetobacteraceae	Acetobacter
1	TBB_343	TBB_298	TBB	melanogaster	Wild	Fruit	Guts	Proteobacteria	Alphaproteobacteria	Rhodospirillales	Acetobacteraceae	Acetobacter
1	TBB_345	TBB_298	TBB	melanogaster	Wild	Fruit	Guts	Proteobacteria	Alphaproteobacteria	Rhodospirillales	Acetobacteraceae	Acetobacter
1	TBB_346	TBB_298	TBB	melanogaster	Wild	Fruit	Guts	Proteobacteria	Alphaproteobacteria	Rhodospirillales	Acetobacteraceae	Acetobacter
1	TBB_350	TBB_298	TBB	melanogaster	Wild	Fruit	Guts	Proteobacteria	Alphaproteobacteria	Rhodospirillales	Acetobacteraceae	Acetobacter
1	TBB_352	TBB_298	TBB	melanogaster	Wild	Fruit	Guts	Proteobacteria	Alphaproteobacteria	Rhodospirillales	Acetobacteraceae	Acetobacter
1	TBB_353	TBB_298	TBB	melanogaster	Wild	Fruit	Guts	Proteobacteria	Alphaproteobacteria	Rhodospirillales	Acetobacteraceae	Acetobacter
1	TBB_354	TBB_298	TBB	melanogaster	Wild	Fruit	Guts	Proteobacteria	Alphaproteobacteria	Rhodospirillales	Acetobacteraceae	Acetobacter
1	TBB_357	TBB_298	TBB	melanogaster	Wild	Fruit	Guts	Proteobacteria	Alphaproteobacteria	Rhodospirillales	Acetobacteraceae	Acetobacter
1	TBB_359	TBB_298	TBB	melanogaster	Wild	Fruit	Guts	Proteobacteria	Alphaproteobacteria	Rhodospirillales	Acetobacteraceae	Acetobacter
1	TBB_360	TBB_298	TBB	melanogaster	Wild	Fruit	Guts	Proteobacteria	Alphaproteobacteria	Rhodospirillales	Acetobacteraceae	Acetobacter
1	TBB_363	TBB_298	TBB	melanogaster	Wild	Fruit	Guts	Proteobacteria	Alphaproteobacteria	Rhodospirillales	Acetobacteraceae	Acetobacter
1	TBB_366	TBB_298	TBB	melanogaster	Wild	Fruit	Guts	Proteobacteria	Alphaproteobacteria	Rhodospirillales	Acetobacteraceae	Acetobacter
1	TBB_367	TBB_298	TBB	melanogaster	Wild	Fruit	Guts	Proteobacteria	Alphaproteobacteria	Rhodospirillales	Acetobacteraceae	Acetobacter
1	TBB_369	TBB_298	TBB	melanogaster	Wild	Fruit	Guts	Proteobacteria	Alphaproteobacteria	Rhodospirillales	Acetobacteraceae	Acetobacter
1	TBB_371	TBB_298	TBB	melanogaster	Wild	Fruit	Guts	Proteobacteria	Alphaproteobacteria	Rhodospirillales	Acetobacteraceae	Acetobacter
1	TBB_372	TBB_298	TBB	melanogaster	Wild	Fruit	Guts	Proteobacteria	Alphaproteobacteria	Rhodospirillales	Acetobacteraceae	Acetobacter
1	TBB_373	TBB_298	TBB	melanogaster	Wild	Fruit	Guts	Proteobacteria	Alphaproteobacteria	Rhodospirillales	Acetobacteraceae	Acetobacter
1	TBB_374	TBB_298	TBB	melanogaster	Wild	Fruit	Guts	Proteobacteria	Alphaproteobacteria	Rhodospirillales	Acetobacteraceae	Acetobacter
1	TBB_375	TBB_298	TBB	melanogaster	Wild	Fruit	Guts	Proteobacteria	Alphaproteobacteria	Rhodospirillales	Acetobacteraceae	Acetobacter
1	TBB_377	TBB_298	TBB	melanogaster	Wild	Fruit	Guts	Proteobacteria	Alphaproteobacteria	Rhodospirillales	Acetobacteraceae	Acetobacter
1	TBB_378	TBB_298	TBB	melanogaster	Wild	Fruit	Guts	Proteobacteria	Alphaproteobacteria	Rhodospirillales	Acetobacteraceae	Acetobacter
1	TBB_379	TBB_298	TBB	melanogaster	Wild	Fruit	Guts	Proteobacteria	Alphaproteobacteria	Rhodospirillales	Acetobacteraceae	Acetobacter
1	TBB_381	TBB_298	TBB	melanogaster	Wild	Fruit	Guts	Proteobacteria	Alphaproteobacteria	Rhodospirillales	Acetobacteraceae	Acetobacter
1	TBB_382	TBB_298	TBB	melanogaster	Wild	Fruit	Guts	Proteobacteria	Alphaproteobacteria	Rhodospirillales	Acetobacteraceae	Acetobacter
1	TBB_398	TBB_298	TBB	melanogaster	Wild	Fruit	Guts	Proteobacteria	Alphaproteobacteria	Rhodospirillales	Acetobacteraceae	Acetobacter
1	ORF_087	ORF_087	ORF	melanogaster	Lab	Kimbrell	Guts	Bacteroidetes	Flavobacteria	Flavobacteriales	Flavobacteriaceae	Chryseobacterium
1	ORF_057	ORF_067	ORF	melanogaster	Lab	Kimbrell	Guts	Actinobacteria	Actinobacteria	Actinomycetales	Corynebacteriaceae	Corynebacterium
1	ORF_067	ORF_067	ORF	melanogaster	Lab	Kimbrell	Guts	Actinobacteria	Actinobacteria	Actinomycetales	Corynebacteriaceae	Corynebacterium
1	TBB_026	TBB_470	TBB	melanogaster	Wild	Fruit	Guts	Bacteroidetes	Flavobacteria	Flavobacteriales	Flavobacteriaceae	Empedobacter
1	TBB_036	TBB_470	TBB	melanogaster	Wild	Fruit	Guts	Bacteroidetes	Flavobacteria	Flavobacteriales	Flavobacteriaceae	Empedobacter
1	TBB_070	TBB_470	TBB	melanogaster	Wild	Fruit	Guts	Bacteroidetes	Flavobacteria	Flavobacteriales	Flavobacteriaceae	Empedobacter
1	TBB_074	TBB_470	TBB	melanogaster	Wild	Fruit	Guts	Bacteroidetes	Flavobacteria	Flavobacteriales	Flavobacteriaceae	Empedobacter
1	TBB_086	TBB_470	TBB	melanogaster	Wild	Fruit	Guts	Bacteroidetes	Flavobacteria	Flavobacteriales	Flavobacteriaceae	Empedobacter
1	TBB_201	TBB_470	TBB	melanogaster	Wild	Fruit	Guts	Bacteroidetes	Flavobacteria	Flavobacteriales	Flavobacteriaceae	Empedobacter
1	TBB_202	TBB_470	TBB	melanogaster	Wild	Fruit	Guts	Bacteroidetes	Flavobacteria	Flavobacteriales	Flavobacteriaceae	Empedobacter
1	TBB_203	TBB_470	TBB	melanogaster	Wild	Fruit	Guts	Bacteroidetes	Flavobacteria	Flavobacteriales	Flavobacteriaceae	Empedobacter
1	TBB_217	TBB_470	TBB	melanogaster	Wild	Fruit	Guts	Bacteroidetes	Flavobacteria	Flavobacteriales	Flavobacteriaceae	Empedobacter
1	TBB_239	TBB_470	TBB	melanogaster	Wild	Fruit	Guts	Bacteroidetes	Flavobacteria	Flavobacteriales	Flavobacteriaceae	Empedobacter
1	TBB_266	TBB_470	TBB	melanogaster	Wild	Fruit	Guts	Bacteroidetes	Flavobacteria	Flavobacteriales	Flavobacteriaceae	Empedobacter
1	TBB_385	TBB_470	TBB	melanogaster	Wild	Fruit	Guts	Bacteroidetes	Flavobacteria	Flavobacteriales	Flavobacteriaceae	Empedobacter
1	TBB_412	TBB_470	TBB	melanogaster	Wild	Fruit	Guts	Bacteroidetes	Flavobacteria	Flavobacteriales	Flavobacteriaceae	Empedobacter
1	TBB_421	TBB_470	TBB	melanogaster	Wild	Fruit	Guts	Bacteroidetes	Flavobacteria	Flavobacteriales	Flavobacteriaceae	Empedobacter
1	TBB_459	TBB_470	TBB	melanogaster	Wild	Fruit	Guts	Bacteroidetes	Flavobacteria	Flavobacteriales	Flavobacteriaceae	Empedobacter
1	TBB_461	TBB_470	TBB	melanogaster	Wild	Fruit	Guts	Bacteroidetes	Flavobacteria	Flavobacteriales	Flavobacteriaceae	Empedobacter
1	TBB_462	TBB_470	TBB	melanogaster	Wild	Fruit	Guts	Bacteroidetes	Flavobacteria	Flavobacteriales	Flavobacteriaceae	Empedobacter
1	TBB_470	TBB_470	TBB	melanogaster	Wild	Fruit	Guts	Bacteroidetes	Flavobacteria	Flavobacteriales	Flavobacteriaceae	Empedobacter
1	TBB_129	TBB_129	TBB	melanogaster	Wild	Fruit	Guts	Proteobacteria	Alphaproteobacteria	Rhodospirillales	Acetobacteraceae	Gluconobacter
1	TBB_152	TBB_129	TBB	melanogaster	Wild	Fruit	Guts	Proteobacteria	Alphaproteobacteria	Rhodospirillales	Acetobacteraceae	Gluconobacter
1	TBB_370	TBB_129	TBB	melanogaster	Wild	Fruit	Guts	Proteobacteria	Alphaproteobacteria	Rhodospirillales	Acetobacteraceae	Gluconobacter
1	MED_043	MED_043	MED	melanogaster	Lab	Kopp	Media	Firmicutes	Bacilli	Lactobacillales	Lactobacillaceae	Lactobacillus
1	MED_002	WOG_027	MED	melanogaster	Lab	Kopp	Media	Firmicutes	Bacilli	Lactobacillales	Lactobacillaceae	Lactobacillus
1	ORM_040	WOG_027	ORM	melanogaster	Lab	Kimbrell	Guts	Firmicutes	Bacilli	Lactobacillales	Lactobacillaceae	Lactobacillus
1	WOB_071	WOG_027	WOB	melanogaster	Lab	Kopp	Bodies	Firmicutes	Bacilli	Lactobacillales	Lactobacillaceae	Lactobacillus
1	WOB_072	WOG_027	WOB	melanogaster	Lab	Kopp	Bodies	Firmicutes	Bacilli	Lactobacillales	Lactobacillaceae	Lactobacillus
1	WOB_023	WOG_027	WOB	melanogaster	Lab	Kopp	Bodies	Firmicutes	Bacilli	Lactobacillales	Lactobacillaceae	Lactobacillus
1	WOB_033	WOG_027	WOB	melanogaster	Lab	Kopp	Bodies	Firmicutes	Bacilli	Lactobacillales	Lactobacillaceae	Lactobacillus
1	WOB_093	WOG_027	WOB	melanogaster	Lab	Kopp	Bodies	Firmicutes	Bacilli	Lactobacillales	Lactobacillaceae	Lactobacillus
1	WOB_004	WOG_027	WOB	melanogaster	Lab	Kopp	Bodies	Firmicutes	Bacilli	Lactobacillales	Lactobacillaceae	Lactobacillus
1	WOB_035	WOG_027	WOB	melanogaster	Lab	Kopp	Bodies	Firmicutes	Bacilli	Lactobacillales	Lactobacillaceae	Lactobacillus
1	WOB_026	WOG_027	WOB	melanogaster	Lab	Kopp	Bodies	Firmicutes	Bacilli	Lactobacillales	Lactobacillaceae	Lactobacillus
1	WOB_066	WOG_027	WOB	melanogaster	Lab	Kopp	Bodies	Firmicutes	Bacilli	Lactobacillales	Lactobacillaceae	Lactobacillus
1	WOB_096	WOG_027	WOB	melanogaster	Lab	Kopp	Bodies	Firmicutes	Bacilli	Lactobacillales	Lactobacillaceae	Lactobacillus
1	WOB_037	WOG_027	WOB	melanogaster	Lab	Kopp	Bodies	Firmicutes	Bacilli	Lactobacillales	Lactobacillaceae	Lactobacillus
1	WOB_048	WOG_027	WOB	melanogaster	Lab	Kopp	Bodies	Firmicutes	Bacilli	Lactobacillales	Lactobacillaceae	Lactobacillus
1	WOB_089	WOG_027	WOB	melanogaster	Lab	Kopp	Bodies	Firmicutes	Bacilli	Lactobacillales	Lactobacillaceae	Lactobacillus
1	WOE_020	WOG_027	WOE	melanogaster	Lab	Kopp	External	Firmicutes	Bacilli	Lactobacillales	Lactobacillaceae	Lactobacillus
1	WOE_050	WOG_027	WOE	melanogaster	Lab	Kopp	External	Firmicutes	Bacilli	Lactobacillales	Lactobacillaceae	Lactobacillus
1	WOE_011	WOG_027	WOE	melanogaster	Lab	Kopp	External	Firmicutes	Bacilli	Lactobacillales	Lactobacillaceae	Lactobacillus
1	WOE_051	WOG_027	WOE	melanogaster	Lab	Kopp	External	Firmicutes	Bacilli	Lactobacillales	Lactobacillaceae	Lactobacillus
1	WOE_061	WOG_027	WOE	melanogaster	Lab	Kopp	External	Firmicutes	Bacilli	Lactobacillales	Lactobacillaceae	Lactobacillus
1	WOE_071	WOG_027	WOE	melanogaster	Lab	Kopp	External	Firmicutes	Bacilli	Lactobacillales	Lactobacillaceae	Lactobacillus
1	WOE_081	WOG_027	WOE	melanogaster	Lab	Kopp	External	Firmicutes	Bacilli	Lactobacillales	Lactobacillaceae	Lactobacillus
1	WOE_002	WOG_027	WOE	melanogaster	Lab	Kopp	External	Firmicutes	Bacilli	Lactobacillales	Lactobacillaceae	Lactobacillus
1	WOE_042	WOG_027	WOE	melanogaster	Lab	Kopp	External	Firmicutes	Bacilli	Lactobacillales	Lactobacillaceae	Lactobacillus
1	WOE_052	WOG_027	WOE	melanogaster	Lab	Kopp	External	Firmicutes	Bacilli	Lactobacillales	Lactobacillaceae	Lactobacillus
1	WOE_062	WOG_027	WOE	melanogaster	Lab	Kopp	External	Firmicutes	Bacilli	Lactobacillales	Lactobacillaceae	Lactobacillus
1	WOE_072	WOG_027	WOE	melanogaster	Lab	Kopp	External	Firmicutes	Bacilli	Lactobacillales	Lactobacillaceae	Lactobacillus
1	WOE_003	WOG_027	WOE	melanogaster	Lab	Kopp	External	Firmicutes	Bacilli	Lactobacillales	Lactobacillaceae	Lactobacillus
1	WOE_023	WOG_027	WOE	melanogaster	Lab	Kopp	External	Firmicutes	Bacilli	Lactobacillales	Lactobacillaceae	Lactobacillus
1	WOE_043	WOG_027	WOE	melanogaster	Lab	Kopp	External	Firmicutes	Bacilli	Lactobacillales	Lactobacillaceae	Lactobacillus
1	WOE_053	WOG_027	WOE	melanogaster	Lab	Kopp	External	Firmicutes	Bacilli	Lactobacillales	Lactobacillaceae	Lactobacillus
1	WOE_063	WOG_027	WOE	melanogaster	Lab	Kopp	External	Firmicutes	Bacilli	Lactobacillales	Lactobacillaceae	Lactobacillus
1	WOE_004	WOG_027	WOE	melanogaster	Lab	Kopp	External	Firmicutes	Bacilli	Lactobacillales	Lactobacillaceae	Lactobacillus
1	WOE_014	WOG_027	WOE	melanogaster	Lab	Kopp	External	Firmicutes	Bacilli	Lactobacillales	Lactobacillaceae	Lactobacillus
1	WOE_044	WOG_027	WOE	melanogaster	Lab	Kopp	External	Firmicutes	Bacilli	Lactobacillales	Lactobacillaceae	Lactobacillus
1	WOE_054	WOG_027	WOE	melanogaster	Lab	Kopp	External	Firmicutes	Bacilli	Lactobacillales	Lactobacillaceae	Lactobacillus
1	WOE_064	WOG_027	WOE	melanogaster	Lab	Kopp	External	Firmicutes	Bacilli	Lactobacillales	Lactobacillaceae	Lactobacillus
1	WOE_084	WOG_027	WOE	melanogaster	Lab	Kopp	External	Firmicutes	Bacilli	Lactobacillales	Lactobacillaceae	Lactobacillus
1	WOE_094	WOG_027	WOE	melanogaster	Lab	Kopp	External	Firmicutes	Bacilli	Lactobacillales	Lactobacillaceae	Lactobacillus
1	WOE_045	WOG_027	WOE	melanogaster	Lab	Kopp	External	Firmicutes	Bacilli	Lactobacillales	Lactobacillaceae	Lactobacillus
1	WOE_055	WOG_027	WOE	melanogaster	Lab	Kopp	External	Firmicutes	Bacilli	Lactobacillales	Lactobacillaceae	Lactobacillus
1	WOE_075	WOG_027	WOE	melanogaster	Lab	Kopp	External	Firmicutes	Bacilli	Lactobacillales	Lactobacillaceae	Lactobacillus
1	WOE_006	WOG_027	WOE	melanogaster	Lab	Kopp	External	Firmicutes	Bacilli	Lactobacillales	Lactobacillaceae	Lactobacillus
1	WOE_016	WOG_027	WOE	melanogaster	Lab	Kopp	External	Firmicutes	Bacilli	Lactobacillales	Lactobacillaceae	Lactobacillus
1	WOE_026	WOG_027	WOE	melanogaster	Lab	Kopp	External	Firmicutes	Bacilli	Lactobacillales	Lactobacillaceae	Lactobacillus
1	WOE_036	WOG_027	WOE	melanogaster	Lab	Kopp	External	Firmicutes	Bacilli	Lactobacillales	Lactobacillaceae	Lactobacillus
1	WOE_046	WOG_027	WOE	melanogaster	Lab	Kopp	External	Firmicutes	Bacilli	Lactobacillales	Lactobacillaceae	Lactobacillus
1	WOE_017	WOG_027	WOE	melanogaster	Lab	Kopp	External	Firmicutes	Bacilli	Lactobacillales	Lactobacillaceae	Lactobacillus
1	WOE_027	WOG_027	WOE	melanogaster	Lab	Kopp	External	Firmicutes	Bacilli	Lactobacillales	Lactobacillaceae	Lactobacillus
1	WOE_067	WOG_027	WOE	melanogaster	Lab	Kopp	External	Firmicutes	Bacilli	Lactobacillales	Lactobacillaceae	Lactobacillus
1	WOE_077	WOG_027	WOE	melanogaster	Lab	Kopp	External	Firmicutes	Bacilli	Lactobacillales	Lactobacillaceae	Lactobacillus
1	WOE_018	WOG_027	WOE	melanogaster	Lab	Kopp	External	Firmicutes	Bacilli	Lactobacillales	Lactobacillaceae	Lactobacillus
1	WOE_028	WOG_027	WOE	melanogaster	Lab	Kopp	External	Firmicutes	Bacilli	Lactobacillales	Lactobacillaceae	Lactobacillus
1	WOE_058	WOG_027	WOE	melanogaster	Lab	Kopp	External	Firmicutes	Bacilli	Lactobacillales	Lactobacillaceae	Lactobacillus
1	WOE_068	WOG_027	WOE	melanogaster	Lab	Kopp	External	Firmicutes	Bacilli	Lactobacillales	Lactobacillaceae	Lactobacillus
1	WOE_019	WOG_027	WOE	melanogaster	Lab	Kopp	External	Firmicutes	Bacilli	Lactobacillales	Lactobacillaceae	Lactobacillus
1	WOE_029	WOG_027	WOE	melanogaster	Lab	Kopp	External	Firmicutes	Bacilli	Lactobacillales	Lactobacillaceae	Lactobacillus
1	WOE_049	WOG_027	WOE	melanogaster	Lab	Kopp	External	Firmicutes	Bacilli	Lactobacillales	Lactobacillaceae	Lactobacillus
1	WOE_059	WOG_027	WOE	melanogaster	Lab	Kopp	External	Firmicutes	Bacilli	Lactobacillales	Lactobacillaceae	Lactobacillus
1	WOE_079	WOG_027	WOE	melanogaster	Lab	Kopp	External	Firmicutes	Bacilli	Lactobacillales	Lactobacillaceae	Lactobacillus
1	WOG_010	WOG_027	WOG	melanogaster	Lab	Kopp	Guts	Firmicutes	Bacilli	Lactobacillales	Lactobacillaceae	Lactobacillus
1	WOG_050	WOG_027	WOG	melanogaster	Lab	Kopp	Guts	Firmicutes	Bacilli	Lactobacillales	Lactobacillaceae	Lactobacillus
1	WOG_070	WOG_027	WOG	melanogaster	Lab	Kopp	Guts	Firmicutes	Bacilli	Lactobacillales	Lactobacillaceae	Lactobacillus
1	WOG_001	WOG_027	WOG	melanogaster	Lab	Kopp	Guts	Firmicutes	Bacilli	Lactobacillales	Lactobacillaceae	Lactobacillus
1	WOG_011	WOG_027	WOG	melanogaster	Lab	Kopp	Guts	Firmicutes	Bacilli	Lactobacillales	Lactobacillaceae	Lactobacillus
1	WOG_021	WOG_027	WOG	melanogaster	Lab	Kopp	Guts	Firmicutes	Bacilli	Lactobacillales	Lactobacillaceae	Lactobacillus
1	WOG_031	WOG_027	WOG	melanogaster	Lab	Kopp	Guts	Firmicutes	Bacilli	Lactobacillales	Lactobacillaceae	Lactobacillus
1	WOG_041	WOG_027	WOG	melanogaster	Lab	Kopp	Guts	Firmicutes	Bacilli	Lactobacillales	Lactobacillaceae	Lactobacillus
1	WOG_061	WOG_027	WOG	melanogaster	Lab	Kopp	Guts	Firmicutes	Bacilli	Lactobacillales	Lactobacillaceae	Lactobacillus
1	WOG_071	WOG_027	WOG	melanogaster	Lab	Kopp	Guts	Firmicutes	Bacilli	Lactobacillales	Lactobacillaceae	Lactobacillus
1	WOG_002	WOG_027	WOG	melanogaster	Lab	Kopp	Guts	Firmicutes	Bacilli	Lactobacillales	Lactobacillaceae	Lactobacillus
1	WOG_042	WOG_027	WOG	melanogaster	Lab	Kopp	Guts	Firmicutes	Bacilli	Lactobacillales	Lactobacillaceae	Lactobacillus
1	WOG_052	WOG_027	WOG	melanogaster	Lab	Kopp	Guts	Firmicutes	Bacilli	Lactobacillales	Lactobacillaceae	Lactobacillus
1	WOG_062	WOG_027	WOG	melanogaster	Lab	Kopp	Guts	Firmicutes	Bacilli	Lactobacillales	Lactobacillaceae	Lactobacillus
1	WOG_072	WOG_027	WOG	melanogaster	Lab	Kopp	Guts	Firmicutes	Bacilli	Lactobacillales	Lactobacillaceae	Lactobacillus
1	WOG_092	WOG_027	WOG	melanogaster	Lab	Kopp	Guts	Firmicutes	Bacilli	Lactobacillales	Lactobacillaceae	Lactobacillus
1	WOG_013	WOG_027	WOG	melanogaster	Lab	Kopp	Guts	Firmicutes	Bacilli	Lactobacillales	Lactobacillaceae	Lactobacillus
1	WOG_023	WOG_027	WOG	melanogaster	Lab	Kopp	Guts	Firmicutes	Bacilli	Lactobacillales	Lactobacillaceae	Lactobacillus
1	WOG_033	WOG_027	WOG	melanogaster	Lab	Kopp	Guts	Firmicutes	Bacilli	Lactobacillales	Lactobacillaceae	Lactobacillus
1	WOG_043	WOG_027	WOG	melanogaster	Lab	Kopp	Guts	Firmicutes	Bacilli	Lactobacillales	Lactobacillaceae	Lactobacillus
1	WOG_053	WOG_027	WOG	melanogaster	Lab	Kopp	Guts	Firmicutes	Bacilli	Lactobacillales	Lactobacillaceae	Lactobacillus
1	WOG_073	WOG_027	WOG	melanogaster	Lab	Kopp	Guts	Firmicutes	Bacilli	Lactobacillales	Lactobacillaceae	Lactobacillus
1	WOG_014	WOG_027	WOG	melanogaster	Lab	Kopp	Guts	Firmicutes	Bacilli	Lactobacillales	Lactobacillaceae	Lactobacillus
1	WOG_024	WOG_027	WOG	melanogaster	Lab	Kopp	Guts	Firmicutes	Bacilli	Lactobacillales	Lactobacillaceae	Lactobacillus
1	WOG_034	WOG_027	WOG	melanogaster	Lab	Kopp	Guts	Firmicutes	Bacilli	Lactobacillales	Lactobacillaceae	Lactobacillus
1	WOG_044	WOG_027	WOG	melanogaster	Lab	Kopp	Guts	Firmicutes	Bacilli	Lactobacillales	Lactobacillaceae	Lactobacillus
1	WOG_054	WOG_027	WOG	melanogaster	Lab	Kopp	Guts	Firmicutes	Bacilli	Lactobacillales	Lactobacillaceae	Lactobacillus
1	WOG_064	WOG_027	WOG	melanogaster	Lab	Kopp	Guts	Firmicutes	Bacilli	Lactobacillales	Lactobacillaceae	Lactobacillus
1	WOG_015	WOG_027	WOG	melanogaster	Lab	Kopp	Guts	Firmicutes	Bacilli	Lactobacillales	Lactobacillaceae	Lactobacillus
1	WOG_045	WOG_027	WOG	melanogaster	Lab	Kopp	Guts	Firmicutes	Bacilli	Lactobacillales	Lactobacillaceae	Lactobacillus
1	WOG_055	WOG_027	WOG	melanogaster	Lab	Kopp	Guts	Firmicutes	Bacilli	Lactobacillales	Lactobacillaceae	Lactobacillus
1	WOG_075	WOG_027	WOG	melanogaster	Lab	Kopp	Guts	Firmicutes	Bacilli	Lactobacillales	Lactobacillaceae	Lactobacillus
1	WOG_095	WOG_027	WOG	melanogaster	Lab	Kopp	Guts	Firmicutes	Bacilli	Lactobacillales	Lactobacillaceae	Lactobacillus
1	WOG_006	WOG_027	WOG	melanogaster	Lab	Kopp	Guts	Firmicutes	Bacilli	Lactobacillales	Lactobacillaceae	Lactobacillus
1	WOG_036	WOG_027	WOG	melanogaster	Lab	Kopp	Guts	Firmicutes	Bacilli	Lactobacillales	Lactobacillaceae	Lactobacillus
1	WOG_066	WOG_027	WOG	melanogaster	Lab	Kopp	Guts	Firmicutes	Bacilli	Lactobacillales	Lactobacillaceae	Lactobacillus
1	WOG_017	WOG_027	WOG	melanogaster	Lab	Kopp	Guts	Firmicutes	Bacilli	Lactobacillales	Lactobacillaceae	Lactobacillus
1	WOG_027	WOG_027	WOG	melanogaster	Lab	Kopp	Guts	Firmicutes	Bacilli	Lactobacillales	Lactobacillaceae	Lactobacillus
1	WOG_057	WOG_027	WOG	melanogaster	Lab	Kopp	Guts	Firmicutes	Bacilli	Lactobacillales	Lactobacillaceae	Lactobacillus
1	WOG_067	WOG_027	WOG	melanogaster	Lab	Kopp	Guts	Firmicutes	Bacilli	Lactobacillales	Lactobacillaceae	Lactobacillus
1	WOG_087	WOG_027	WOG	melanogaster	Lab	Kopp	Guts	Firmicutes	Bacilli	Lactobacillales	Lactobacillaceae	Lactobacillus
1	WOG_008	WOG_027	WOG	melanogaster	Lab	Kopp	Guts	Firmicutes	Bacilli	Lactobacillales	Lactobacillaceae	Lactobacillus
1	WOG_018	WOG_027	WOG	melanogaster	Lab	Kopp	Guts	Firmicutes	Bacilli	Lactobacillales	Lactobacillaceae	Lactobacillus
1	WOG_028	WOG_027	WOG	melanogaster	Lab	Kopp	Guts	Firmicutes	Bacilli	Lactobacillales	Lactobacillaceae	Lactobacillus
1	WOG_038	WOG_027	WOG	melanogaster	Lab	Kopp	Guts	Firmicutes	Bacilli	Lactobacillales	Lactobacillaceae	Lactobacillus
1	WOG_058	WOG_027	WOG	melanogaster	Lab	Kopp	Guts	Firmicutes	Bacilli	Lactobacillales	Lactobacillaceae	Lactobacillus
1	WOG_068	WOG_027	WOG	melanogaster	Lab	Kopp	Guts	Firmicutes	Bacilli	Lactobacillales	Lactobacillaceae	Lactobacillus
1	WOG_078	WOG_027	WOG	melanogaster	Lab	Kopp	Guts	Firmicutes	Bacilli	Lactobacillales	Lactobacillaceae	Lactobacillus
1	WOG_088	WOG_027	WOG	melanogaster	Lab	Kopp	Guts	Firmicutes	Bacilli	Lactobacillales	Lactobacillaceae	Lactobacillus
1	WOG_009	WOG_027	WOG	melanogaster	Lab	Kopp	Guts	Firmicutes	Bacilli	Lactobacillales	Lactobacillaceae	Lactobacillus
1	WOG_019	WOG_027	WOG	melanogaster	Lab	Kopp	Guts	Firmicutes	Bacilli	Lactobacillales	Lactobacillaceae	Lactobacillus
1	WOG_049	WOG_027	WOG	melanogaster	Lab	Kopp	Guts	Firmicutes	Bacilli	Lactobacillales	Lactobacillaceae	Lactobacillus
1	WOG_059	WOG_027	WOG	melanogaster	Lab	Kopp	Guts	Firmicutes	Bacilli	Lactobacillales	Lactobacillaceae	Lactobacillus
1	WOG_079	WOG_027	WOG	melanogaster	Lab	Kopp	Guts	Firmicutes	Bacilli	Lactobacillales	Lactobacillaceae	Lactobacillus
1	WOG_089	WOG_027	WOG	melanogaster	Lab	Kopp	Guts	Firmicutes	Bacilli	Lactobacillales	Lactobacillaceae	Lactobacillus
1	WOP_143	WOG_027	WOP	melanogaster	Lab	Kopp	Pupae	Firmicutes	Bacilli	Lactobacillales	Lactobacillaceae	Lactobacillus
1	WOP_044	WOG_027	WOP	melanogaster	Lab	Kopp	Pupae	Firmicutes	Bacilli	Lactobacillales	Lactobacillaceae	Lactobacillus
1	WOP_054	WOG_027	WOP	melanogaster	Lab	Kopp	Pupae	Firmicutes	Bacilli	Lactobacillales	Lactobacillaceae	Lactobacillus
1	WOP_055	WOG_027	WOP	melanogaster	Lab	Kopp	Pupae	Firmicutes	Bacilli	Lactobacillales	Lactobacillaceae	Lactobacillus
1	XDA_071	WOG_027	XDA	melanogaster	Lab	Kopp	Guts	Firmicutes	Bacilli	Lactobacillales	Lactobacillaceae	Lactobacillus
1	XDA_109	WOG_027	XDA	melanogaster	Lab	Kopp	Guts	Firmicutes	Bacilli	Lactobacillales	Lactobacillaceae	Lactobacillus
1	XDE_045	WOG_027	XDE	melanogaster	Lab	Kopp	Guts	Firmicutes	Bacilli	Lactobacillales	Lactobacillaceae	Lactobacillus
1	XDO_069	WOG_027	XDO	melanogaster	Lab	Kopp	Guts	Firmicutes	Bacilli	Lactobacillales	Lactobacillaceae	Lactobacillus
1	XDY_102	WOG_027	XDY	melanogaster	Lab	Kopp	Guts	Firmicutes	Bacilli	Lactobacillales	Lactobacillaceae	Lactobacillus
1	XYM_009	WOG_027	XYM	melanogaster	Lab	Kopp	Guts	Firmicutes	Bacilli	Lactobacillales	Lactobacillaceae	Lactobacillus
1	MAH_009	WOG_027	MAH	melanogaster	Wild	Fruit	Guts	Firmicutes	Bacilli	Lactobacillales	Lactobacillaceae	Lactobacillus
1	MAH_015	WOG_027	MAH	melanogaster	Wild	Fruit	Guts	Firmicutes	Bacilli	Lactobacillales	Lactobacillaceae	Lactobacillus
1	MAH_023	WOG_027	MAH	melanogaster	Wild	Fruit	Guts	Firmicutes	Bacilli	Lactobacillales	Lactobacillaceae	Lactobacillus
1	MAH_031	WOG_027	MAH	melanogaster	Wild	Fruit	Guts	Firmicutes	Bacilli	Lactobacillales	Lactobacillaceae	Lactobacillus
1	MAH_033	WOG_027	MAH	melanogaster	Wild	Fruit	Guts	Firmicutes	Bacilli	Lactobacillales	Lactobacillaceae	Lactobacillus
1	MAH_058	WOG_027	MAH	melanogaster	Wild	Fruit	Guts	Firmicutes	Bacilli	Lactobacillales	Lactobacillaceae	Lactobacillus
1	MAH_062	WOG_027	MAH	melanogaster	Wild	Fruit	Guts	Firmicutes	Bacilli	Lactobacillales	Lactobacillaceae	Lactobacillus
1	MAH_065	WOG_027	MAH	melanogaster	Wild	Fruit	Guts	Firmicutes	Bacilli	Lactobacillales	Lactobacillaceae	Lactobacillus
1	MAH_069	WOG_027	MAH	melanogaster	Wild	Fruit	Guts	Firmicutes	Bacilli	Lactobacillales	Lactobacillaceae	Lactobacillus
1	MAH_074	WOG_027	MAH	melanogaster	Wild	Fruit	Guts	Firmicutes	Bacilli	Lactobacillales	Lactobacillaceae	Lactobacillus
1	MAH_081	WOG_027	MAH	melanogaster	Wild	Fruit	Guts	Firmicutes	Bacilli	Lactobacillales	Lactobacillaceae	Lactobacillus
1	MAH_082	WOG_027	MAH	melanogaster	Wild	Fruit	Guts	Firmicutes	Bacilli	Lactobacillales	Lactobacillaceae	Lactobacillus
1	MAH_091	WOG_027	MAH	melanogaster	Wild	Fruit	Guts	Firmicutes	Bacilli	Lactobacillales	Lactobacillaceae	Lactobacillus
1	MAW_014	WOG_027	MAW	melanogaster	Wild	Fruit	Bodies	Firmicutes	Bacilli	Lactobacillales	Lactobacillaceae	Lactobacillus
1	MAW_023	WOG_027	MAW	melanogaster	Wild	Fruit	Bodies	Firmicutes	Bacilli	Lactobacillales	Lactobacillaceae	Lactobacillus
1	MAW_025	WOG_027	MAW	melanogaster	Wild	Fruit	Bodies	Firmicutes	Bacilli	Lactobacillales	Lactobacillaceae	Lactobacillus
1	MAW_027	WOG_027	MAW	melanogaster	Wild	Fruit	Bodies	Firmicutes	Bacilli	Lactobacillales	Lactobacillaceae	Lactobacillus
1	MAW_030	WOG_027	MAW	melanogaster	Wild	Fruit	Bodies	Firmicutes	Bacilli	Lactobacillales	Lactobacillaceae	Lactobacillus
1	MAW_033	WOG_027	MAW	melanogaster	Wild	Fruit	Bodies	Firmicutes	Bacilli	Lactobacillales	Lactobacillaceae	Lactobacillus
1	MAW_035	WOG_027	MAW	melanogaster	Wild	Fruit	Bodies	Firmicutes	Bacilli	Lactobacillales	Lactobacillaceae	Lactobacillus
1	MAW_047	WOG_027	MAW	melanogaster	Wild	Fruit	Bodies	Firmicutes	Bacilli	Lactobacillales	Lactobacillaceae	Lactobacillus
1	MAW_048	WOG_027	MAW	melanogaster	Wild	Fruit	Bodies	Firmicutes	Bacilli	Lactobacillales	Lactobacillaceae	Lactobacillus
1	MAW_049	WOG_027	MAW	melanogaster	Wild	Fruit	Bodies	Firmicutes	Bacilli	Lactobacillales	Lactobacillaceae	Lactobacillus
1	MAW_056	WOG_027	MAW	melanogaster	Wild	Fruit	Bodies	Firmicutes	Bacilli	Lactobacillales	Lactobacillaceae	Lactobacillus
1	MAW_057	WOG_027	MAW	melanogaster	Wild	Fruit	Bodies	Firmicutes	Bacilli	Lactobacillales	Lactobacillaceae	Lactobacillus
1	MAW_067	WOG_027	MAW	melanogaster	Wild	Fruit	Bodies	Firmicutes	Bacilli	Lactobacillales	Lactobacillaceae	Lactobacillus
1	MAW_072	WOG_027	MAW	melanogaster	Wild	Fruit	Bodies	Firmicutes	Bacilli	Lactobacillales	Lactobacillaceae	Lactobacillus
1	MAW_077	WOG_027	MAW	melanogaster	Wild	Fruit	Bodies	Firmicutes	Bacilli	Lactobacillales	Lactobacillaceae	Lactobacillus
1	MAW_084	WOG_027	MAW	melanogaster	Wild	Fruit	Bodies	Firmicutes	Bacilli	Lactobacillales	Lactobacillaceae	Lactobacillus
1	MAW_086	WOG_027	MAW	melanogaster	Wild	Fruit	Bodies	Firmicutes	Bacilli	Lactobacillales	Lactobacillaceae	Lactobacillus
1	MAW_088	WOG_027	MAW	melanogaster	Wild	Fruit	Bodies	Firmicutes	Bacilli	Lactobacillales	Lactobacillaceae	Lactobacillus
1	MAW_090	WOG_027	MAW	melanogaster	Wild	Fruit	Bodies	Firmicutes	Bacilli	Lactobacillales	Lactobacillaceae	Lactobacillus
1	TBB_405	WOG_027	TBB	melanogaster	Wild	Fruit	Guts	Firmicutes	Bacilli	Lactobacillales	Lactobacillaceae	Lactobacillus
1	TBB_446	WOG_027	TBB	melanogaster	Wild	Fruit	Guts	Firmicutes	Bacilli	Lactobacillales	Lactobacillaceae	Lactobacillus
1	TBB_455	WOG_027	TBB	melanogaster	Wild	Fruit	Guts	Firmicutes	Bacilli	Lactobacillales	Lactobacillaceae	Lactobacillus
1	MED_076	MAW_097	MED	melanogaster	Lab	Kopp	Media	Firmicutes	Bacilli	Lactobacillales	Lactobacillaceae	Lactobacillus
1	WOB_060	MAW_097	WOB	melanogaster	Lab	Kopp	Bodies	Firmicutes	Bacilli	Lactobacillales	Lactobacillaceae	Lactobacillus
1	WOB_052	MAW_097	WOB	melanogaster	Lab	Kopp	Bodies	Firmicutes	Bacilli	Lactobacillales	Lactobacillaceae	Lactobacillus
1	WOB_092	MAW_097	WOB	melanogaster	Lab	Kopp	Bodies	Firmicutes	Bacilli	Lactobacillales	Lactobacillaceae	Lactobacillus
1	WOB_024	MAW_097	WOB	melanogaster	Lab	Kopp	Bodies	Firmicutes	Bacilli	Lactobacillales	Lactobacillaceae	Lactobacillus
1	WOB_045	MAW_097	WOB	melanogaster	Lab	Kopp	Bodies	Firmicutes	Bacilli	Lactobacillales	Lactobacillaceae	Lactobacillus
1	WOB_067	MAW_097	WOB	melanogaster	Lab	Kopp	Bodies	Firmicutes	Bacilli	Lactobacillales	Lactobacillaceae	Lactobacillus
1	WOB_029	MAW_097	WOB	melanogaster	Lab	Kopp	Bodies	Firmicutes	Bacilli	Lactobacillales	Lactobacillaceae	Lactobacillus
1	WOB_049	MAW_097	WOB	melanogaster	Lab	Kopp	Bodies	Firmicutes	Bacilli	Lactobacillales	Lactobacillaceae	Lactobacillus
1	WOB_079	MAW_097	WOB	melanogaster	Lab	Kopp	Bodies	Firmicutes	Bacilli	Lactobacillales	Lactobacillaceae	Lactobacillus
1	WOE_007	MAW_097	WOE	melanogaster	Lab	Kopp	External	Firmicutes	Bacilli	Lactobacillales	Lactobacillaceae	Lactobacillus
1	WOG_093	MAW_097	WOG	melanogaster	Lab	Kopp	Guts	Firmicutes	Bacilli	Lactobacillales	Lactobacillaceae	Lactobacillus
1	WOG_025	MAW_097	WOG	melanogaster	Lab	Kopp	Guts	Firmicutes	Bacilli	Lactobacillales	Lactobacillaceae	Lactobacillus
1	WOP_045	MAW_097	WOP	melanogaster	Lab	Kopp	Pupae	Firmicutes	Bacilli	Lactobacillales	Lactobacillaceae	Lactobacillus
1	WOP_048	MAW_097	WOP	melanogaster	Lab	Kopp	Pupae	Firmicutes	Bacilli	Lactobacillales	Lactobacillaceae	Lactobacillus
1	XDO_245	MAW_097	XDO	melanogaster	Lab	Kopp	Guts	Firmicutes	Bacilli	Lactobacillales	Lactobacillaceae	Lactobacillus
1	MAW_001	MAW_097	MAW	melanogaster	Wild	Fruit	Bodies	Firmicutes	Bacilli	Lactobacillales	Lactobacillaceae	Lactobacillus
1	MAW_002	MAW_097	MAW	melanogaster	Wild	Fruit	Bodies	Firmicutes	Bacilli	Lactobacillales	Lactobacillaceae	Lactobacillus
1	MAW_003	MAW_097	MAW	melanogaster	Wild	Fruit	Bodies	Firmicutes	Bacilli	Lactobacillales	Lactobacillaceae	Lactobacillus
1	MAW_004	MAW_097	MAW	melanogaster	Wild	Fruit	Bodies	Firmicutes	Bacilli	Lactobacillales	Lactobacillaceae	Lactobacillus
1	MAW_010	MAW_097	MAW	melanogaster	Wild	Fruit	Bodies	Firmicutes	Bacilli	Lactobacillales	Lactobacillaceae	Lactobacillus
1	MAW_011	MAW_097	MAW	melanogaster	Wild	Fruit	Bodies	Firmicutes	Bacilli	Lactobacillales	Lactobacillaceae	Lactobacillus
1	MAW_015	MAW_097	MAW	melanogaster	Wild	Fruit	Bodies	Firmicutes	Bacilli	Lactobacillales	Lactobacillaceae	Lactobacillus
1	MAW_016	MAW_097	MAW	melanogaster	Wild	Fruit	Bodies	Firmicutes	Bacilli	Lactobacillales	Lactobacillaceae	Lactobacillus
1	MAW_018	MAW_097	MAW	melanogaster	Wild	Fruit	Bodies	Firmicutes	Bacilli	Lactobacillales	Lactobacillaceae	Lactobacillus
1	MAW_020	MAW_097	MAW	melanogaster	Wild	Fruit	Bodies	Firmicutes	Bacilli	Lactobacillales	Lactobacillaceae	Lactobacillus
1	MAW_022	MAW_097	MAW	melanogaster	Wild	Fruit	Bodies	Firmicutes	Bacilli	Lactobacillales	Lactobacillaceae	Lactobacillus
1	MAW_024	MAW_097	MAW	melanogaster	Wild	Fruit	Bodies	Firmicutes	Bacilli	Lactobacillales	Lactobacillaceae	Lactobacillus
1	MAW_026	MAW_097	MAW	melanogaster	Wild	Fruit	Bodies	Firmicutes	Bacilli	Lactobacillales	Lactobacillaceae	Lactobacillus
1	MAW_031	MAW_097	MAW	melanogaster	Wild	Fruit	Bodies	Firmicutes	Bacilli	Lactobacillales	Lactobacillaceae	Lactobacillus
1	MAW_032	MAW_097	MAW	melanogaster	Wild	Fruit	Bodies	Firmicutes	Bacilli	Lactobacillales	Lactobacillaceae	Lactobacillus
1	MAW_034	MAW_097	MAW	melanogaster	Wild	Fruit	Bodies	Firmicutes	Bacilli	Lactobacillales	Lactobacillaceae	Lactobacillus
1	MAW_036	MAW_097	MAW	melanogaster	Wild	Fruit	Bodies	Firmicutes	Bacilli	Lactobacillales	Lactobacillaceae	Lactobacillus
1	MAW_037	MAW_097	MAW	melanogaster	Wild	Fruit	Bodies	Firmicutes	Bacilli	Lactobacillales	Lactobacillaceae	Lactobacillus
1	MAW_040	MAW_097	MAW	melanogaster	Wild	Fruit	Bodies	Firmicutes	Bacilli	Lactobacillales	Lactobacillaceae	Lactobacillus
1	MAW_042	MAW_097	MAW	melanogaster	Wild	Fruit	Bodies	Firmicutes	Bacilli	Lactobacillales	Lactobacillaceae	Lactobacillus
1	MAW_044	MAW_097	MAW	melanogaster	Wild	Fruit	Bodies	Firmicutes	Bacilli	Lactobacillales	Lactobacillaceae	Lactobacillus
1	MAW_052	MAW_097	MAW	melanogaster	Wild	Fruit	Bodies	Firmicutes	Bacilli	Lactobacillales	Lactobacillaceae	Lactobacillus
1	MAW_053	MAW_097	MAW	melanogaster	Wild	Fruit	Bodies	Firmicutes	Bacilli	Lactobacillales	Lactobacillaceae	Lactobacillus
1	MAW_054	MAW_097	MAW	melanogaster	Wild	Fruit	Bodies	Firmicutes	Bacilli	Lactobacillales	Lactobacillaceae	Lactobacillus
1	MAW_062	MAW_097	MAW	melanogaster	Wild	Fruit	Bodies	Firmicutes	Bacilli	Lactobacillales	Lactobacillaceae	Lactobacillus
1	MAW_063	MAW_097	MAW	melanogaster	Wild	Fruit	Bodies	Firmicutes	Bacilli	Lactobacillales	Lactobacillaceae	Lactobacillus
1	MAW_064	MAW_097	MAW	melanogaster	Wild	Fruit	Bodies	Firmicutes	Bacilli	Lactobacillales	Lactobacillaceae	Lactobacillus
1	MAW_065	MAW_097	MAW	melanogaster	Wild	Fruit	Bodies	Firmicutes	Bacilli	Lactobacillales	Lactobacillaceae	Lactobacillus
1	MAW_066	MAW_097	MAW	melanogaster	Wild	Fruit	Bodies	Firmicutes	Bacilli	Lactobacillales	Lactobacillaceae	Lactobacillus
1	MAW_070	MAW_097	MAW	melanogaster	Wild	Fruit	Bodies	Firmicutes	Bacilli	Lactobacillales	Lactobacillaceae	Lactobacillus
1	MAW_073	MAW_097	MAW	melanogaster	Wild	Fruit	Bodies	Firmicutes	Bacilli	Lactobacillales	Lactobacillaceae	Lactobacillus
1	MAW_075	MAW_097	MAW	melanogaster	Wild	Fruit	Bodies	Firmicutes	Bacilli	Lactobacillales	Lactobacillaceae	Lactobacillus
1	MAW_076	MAW_097	MAW	melanogaster	Wild	Fruit	Bodies	Firmicutes	Bacilli	Lactobacillales	Lactobacillaceae	Lactobacillus
1	MAW_078	MAW_097	MAW	melanogaster	Wild	Fruit	Bodies	Firmicutes	Bacilli	Lactobacillales	Lactobacillaceae	Lactobacillus
1	MAW_079	MAW_097	MAW	melanogaster	Wild	Fruit	Bodies	Firmicutes	Bacilli	Lactobacillales	Lactobacillaceae	Lactobacillus
1	MAW_081	MAW_097	MAW	melanogaster	Wild	Fruit	Bodies	Firmicutes	Bacilli	Lactobacillales	Lactobacillaceae	Lactobacillus
1	MAW_083	MAW_097	MAW	melanogaster	Wild	Fruit	Bodies	Firmicutes	Bacilli	Lactobacillales	Lactobacillaceae	Lactobacillus
1	MAW_085	MAW_097	MAW	melanogaster	Wild	Fruit	Bodies	Firmicutes	Bacilli	Lactobacillales	Lactobacillaceae	Lactobacillus
1	MAW_087	MAW_097	MAW	melanogaster	Wild	Fruit	Bodies	Firmicutes	Bacilli	Lactobacillales	Lactobacillaceae	Lactobacillus
1	MAW_089	MAW_097	MAW	melanogaster	Wild	Fruit	Bodies	Firmicutes	Bacilli	Lactobacillales	Lactobacillaceae	Lactobacillus
1	MAW_092	MAW_097	MAW	melanogaster	Wild	Fruit	Bodies	Firmicutes	Bacilli	Lactobacillales	Lactobacillaceae	Lactobacillus
1	MAW_093	MAW_097	MAW	melanogaster	Wild	Fruit	Bodies	Firmicutes	Bacilli	Lactobacillales	Lactobacillaceae	Lactobacillus
1	MAW_096	MAW_097	MAW	melanogaster	Wild	Fruit	Bodies	Firmicutes	Bacilli	Lactobacillales	Lactobacillaceae	Lactobacillus
1	MAW_097	MAW_097	MAW	melanogaster	Wild	Fruit	Bodies	Firmicutes	Bacilli	Lactobacillales	Lactobacillaceae	Lactobacillus
1	WOB_040	HPM_219	WOB	melanogaster	Lab	Kopp	Bodies	Firmicutes	Bacilli	Lactobacillales	Leuconostocaceae	Leuconostoc
1	WOB_021	HPM_219	WOB	melanogaster	Lab	Kopp	Bodies	Firmicutes	Bacilli	Lactobacillales	Leuconostocaceae	Leuconostoc
1	WOB_054	HPM_219	WOB	melanogaster	Lab	Kopp	Bodies	Firmicutes	Bacilli	Lactobacillales	Leuconostocaceae	Leuconostoc
1	WOB_046	HPM_219	WOB	melanogaster	Lab	Kopp	Bodies	Firmicutes	Bacilli	Lactobacillales	Leuconostocaceae	Leuconostoc
1	WOB_019	HPM_219	WOB	melanogaster	Lab	Kopp	Bodies	Firmicutes	Bacilli	Lactobacillales	Leuconostocaceae	Leuconostoc
1	XDO_213	HPM_219	XDO	melanogaster	Lab	Kopp	Guts	Firmicutes	Bacilli	Lactobacillales	Leuconostocaceae	Leuconostoc
1	TBB_293	HPM_219	TBB	melanogaster	Wild	Fruit	Guts	Firmicutes	Bacilli	Lactobacillales	Leuconostocaceae	Leuconostoc
1	TBB_131	TBB_131	TBB	melanogaster	Wild	Fruit	Guts	Proteobacteria	Alphaproteobacteria	Rhizobiales	Phyllobacteriaceae	Mesorhizobium
1	TBB_185	TBB_131	TBB	melanogaster	Wild	Fruit	Guts	Proteobacteria	Alphaproteobacteria	Rhizobiales	Phyllobacteriaceae	Mesorhizobium
1	TBB_188	TBB_131	TBB	melanogaster	Wild	Fruit	Guts	Proteobacteria	Alphaproteobacteria	Rhizobiales	Phyllobacteriaceae	Mesorhizobium
1	TBB_190	TBB_131	TBB	melanogaster	Wild	Fruit	Guts	Proteobacteria	Alphaproteobacteria	Rhizobiales	Phyllobacteriaceae	Mesorhizobium
1	TBB_297	TBB_131	TBB	melanogaster	Wild	Fruit	Guts	Proteobacteria	Alphaproteobacteria	Rhizobiales	Phyllobacteriaceae	Mesorhizobium
1	TBB_301	TBB_131	TBB	melanogaster	Wild	Fruit	Guts	Proteobacteria	Alphaproteobacteria	Rhizobiales	Phyllobacteriaceae	Mesorhizobium
1	TBB_308	TBB_131	TBB	melanogaster	Wild	Fruit	Guts	Proteobacteria	Alphaproteobacteria	Rhizobiales	Phyllobacteriaceae	Mesorhizobium
1	TBB_309	TBB_131	TBB	melanogaster	Wild	Fruit	Guts	Proteobacteria	Alphaproteobacteria	Rhizobiales	Phyllobacteriaceae	Mesorhizobium
1	TBB_324	TBB_131	TBB	melanogaster	Wild	Fruit	Guts	Proteobacteria	Alphaproteobacteria	Rhizobiales	Phyllobacteriaceae	Mesorhizobium
1	TBB_327	TBB_131	TBB	melanogaster	Wild	Fruit	Guts	Proteobacteria	Alphaproteobacteria	Rhizobiales	Phyllobacteriaceae	Mesorhizobium
1	TBB_332	TBB_131	TBB	melanogaster	Wild	Fruit	Guts	Proteobacteria	Alphaproteobacteria	Rhizobiales	Phyllobacteriaceae	Mesorhizobium
1	TBB_355	TBB_131	TBB	melanogaster	Wild	Fruit	Guts	Proteobacteria	Alphaproteobacteria	Rhizobiales	Phyllobacteriaceae	Mesorhizobium
1	TBB_358	TBB_131	TBB	melanogaster	Wild	Fruit	Guts	Proteobacteria	Alphaproteobacteria	Rhizobiales	Phyllobacteriaceae	Mesorhizobium
1	TBB_364	TBB_131	TBB	melanogaster	Wild	Fruit	Guts	Proteobacteria	Alphaproteobacteria	Rhizobiales	Phyllobacteriaceae	Mesorhizobium
1	TBB_380	TBB_131	TBB	melanogaster	Wild	Fruit	Guts	Proteobacteria	Alphaproteobacteria	Rhizobiales	Phyllobacteriaceae	Mesorhizobium
1	ORF_050	ORM_053	ORF	melanogaster	Lab	Kimbrell	Guts	Actinobacteria	Actinobacteria	Actinomycetales	Microbacteriaceae	Microbacterium
1	ORF_042	ORM_053	ORF	melanogaster	Lab	Kimbrell	Guts	Actinobacteria	Actinobacteria	Actinomycetales	Microbacteriaceae	Microbacterium
1	ORF_073	ORM_053	ORF	melanogaster	Lab	Kimbrell	Guts	Actinobacteria	Actinobacteria	Actinomycetales	Microbacteriaceae	Microbacterium
1	ORF_004	ORM_053	ORF	melanogaster	Lab	Kimbrell	Guts	Actinobacteria	Actinobacteria	Actinomycetales	Microbacteriaceae	Microbacterium
1	ORF_045	ORM_053	ORF	melanogaster	Lab	Kimbrell	Guts	Actinobacteria	Actinobacteria	Actinomycetales	Microbacteriaceae	Microbacterium
1	ORF_095	ORM_053	ORF	melanogaster	Lab	Kimbrell	Guts	Actinobacteria	Actinobacteria	Actinomycetales	Microbacteriaceae	Microbacterium
1	ORF_056	ORM_053	ORF	melanogaster	Lab	Kimbrell	Guts	Actinobacteria	Actinobacteria	Actinomycetales	Microbacteriaceae	Microbacterium
1	ORF_069	ORM_053	ORF	melanogaster	Lab	Kimbrell	Guts	Actinobacteria	Actinobacteria	Actinomycetales	Microbacteriaceae	Microbacterium
1	ORM_010	ORM_053	ORM	melanogaster	Lab	Kimbrell	Guts	Actinobacteria	Actinobacteria	Actinomycetales	Microbacteriaceae	Microbacterium
1	ORM_070	ORM_053	ORM	melanogaster	Lab	Kimbrell	Guts	Actinobacteria	Actinobacteria	Actinomycetales	Microbacteriaceae	Microbacterium
1	ORM_071	ORM_053	ORM	melanogaster	Lab	Kimbrell	Guts	Actinobacteria	Actinobacteria	Actinomycetales	Microbacteriaceae	Microbacterium
1	ORM_081	ORM_053	ORM	melanogaster	Lab	Kimbrell	Guts	Actinobacteria	Actinobacteria	Actinomycetales	Microbacteriaceae	Microbacterium
1	ORM_002	ORM_053	ORM	melanogaster	Lab	Kimbrell	Guts	Actinobacteria	Actinobacteria	Actinomycetales	Microbacteriaceae	Microbacterium
1	ORM_072	ORM_053	ORM	melanogaster	Lab	Kimbrell	Guts	Actinobacteria	Actinobacteria	Actinomycetales	Microbacteriaceae	Microbacterium
1	ORM_092	ORM_053	ORM	melanogaster	Lab	Kimbrell	Guts	Actinobacteria	Actinobacteria	Actinomycetales	Microbacteriaceae	Microbacterium
1	ORM_053	ORM_053	ORM	melanogaster	Lab	Kimbrell	Guts	Actinobacteria	Actinobacteria	Actinomycetales	Microbacteriaceae	Microbacterium
1	ORM_014	ORM_053	ORM	melanogaster	Lab	Kimbrell	Guts	Actinobacteria	Actinobacteria	Actinomycetales	Microbacteriaceae	Microbacterium
1	ORM_046	ORM_053	ORM	melanogaster	Lab	Kimbrell	Guts	Actinobacteria	Actinobacteria	Actinomycetales	Microbacteriaceae	Microbacterium
1	ORM_027	ORM_053	ORM	melanogaster	Lab	Kimbrell	Guts	Actinobacteria	Actinobacteria	Actinomycetales	Microbacteriaceae	Microbacterium
1	ORM_057	ORM_053	ORM	melanogaster	Lab	Kimbrell	Guts	Actinobacteria	Actinobacteria	Actinomycetales	Microbacteriaceae	Microbacterium
1	ORM_067	ORM_053	ORM	melanogaster	Lab	Kimbrell	Guts	Actinobacteria	Actinobacteria	Actinomycetales	Microbacteriaceae	Microbacterium
1	ORM_018	ORM_053	ORM	melanogaster	Lab	Kimbrell	Guts	Actinobacteria	Actinobacteria	Actinomycetales	Microbacteriaceae	Microbacterium
1	TBB_113	TBB_113	TBB	melanogaster	Wild	Fruit	Guts	Proteobacteria	Alphaproteobacteria	Rhizobiales	Brucellaceae	Ochrobactrum
1	TBB_012	TBB_282	TBB	melanogaster	Wild	Fruit	Guts	Actinobacteria	Actinobacteria	Actinomycetales	Propionibacteriaceae	Propionibacterium
1	TBB_018	TBB_282	TBB	melanogaster	Wild	Fruit	Guts	Actinobacteria	Actinobacteria	Actinomycetales	Propionibacteriaceae	Propionibacterium
1	TBB_027	TBB_282	TBB	melanogaster	Wild	Fruit	Guts	Actinobacteria	Actinobacteria	Actinomycetales	Propionibacteriaceae	Propionibacterium
1	TBB_042	TBB_282	TBB	melanogaster	Wild	Fruit	Guts	Actinobacteria	Actinobacteria	Actinomycetales	Propionibacteriaceae	Propionibacterium
1	TBB_054	TBB_282	TBB	melanogaster	Wild	Fruit	Guts	Actinobacteria	Actinobacteria	Actinomycetales	Propionibacteriaceae	Propionibacterium
1	TBB_072	TBB_282	TBB	melanogaster	Wild	Fruit	Guts	Actinobacteria	Actinobacteria	Actinomycetales	Propionibacteriaceae	Propionibacterium
1	TBB_076	TBB_282	TBB	melanogaster	Wild	Fruit	Guts	Actinobacteria	Actinobacteria	Actinomycetales	Propionibacteriaceae	Propionibacterium
1	TBB_169	TBB_282	TBB	melanogaster	Wild	Fruit	Guts	Actinobacteria	Actinobacteria	Actinomycetales	Propionibacteriaceae	Propionibacterium
1	TBB_200	TBB_282	TBB	melanogaster	Wild	Fruit	Guts	Actinobacteria	Actinobacteria	Actinomycetales	Propionibacteriaceae	Propionibacterium
1	TBB_282	TBB_282	TBB	melanogaster	Wild	Fruit	Guts	Actinobacteria	Actinobacteria	Actinomycetales	Propionibacteriaceae	Propionibacterium
1	TBB_348	TBB_282	TBB	melanogaster	Wild	Fruit	Guts	Actinobacteria	Actinobacteria	Actinomycetales	Propionibacteriaceae	Propionibacterium
1	TBB_356	TBB_282	TBB	melanogaster	Wild	Fruit	Guts	Actinobacteria	Actinobacteria	Actinomycetales	Propionibacteriaceae	Propionibacterium
1	TBB_420	TBB_282	TBB	melanogaster	Wild	Fruit	Guts	Actinobacteria	Actinobacteria	Actinomycetales	Propionibacteriaceae	Propionibacterium
1	TBB_448	TBB_282	TBB	melanogaster	Wild	Fruit	Guts	Actinobacteria	Actinobacteria	Actinomycetales	Propionibacteriaceae	Propionibacterium
1	TBB_466	TBB_282	TBB	melanogaster	Wild	Fruit	Guts	Actinobacteria	Actinobacteria	Actinomycetales	Propionibacteriaceae	Propionibacterium
1	XDS_099	XDS_099	XDS	melanogaster	Lab	Kopp	Guts	Proteobacteria	Gammaproteobacteria	Enterobacteriales	Enterobacteriaceae	Providencia
1	MED_053	XYM_085	MED	melanogaster	Lab	Kopp	Media	Proteobacteria	Gammaproteobacteria	Enterobacteriales	Enterobacteriaceae	Providencia
1	ORF_040	XYM_085	ORF	melanogaster	Lab	Kimbrell	Guts	Proteobacteria	Gammaproteobacteria	Enterobacteriales	Enterobacteriaceae	Providencia
1	ORF_091	XYM_085	ORF	melanogaster	Lab	Kimbrell	Guts	Proteobacteria	Gammaproteobacteria	Enterobacteriales	Enterobacteriaceae	Providencia
1	ORF_002	XYM_085	ORF	melanogaster	Lab	Kimbrell	Guts	Proteobacteria	Gammaproteobacteria	Enterobacteriales	Enterobacteriaceae	Providencia
1	ORF_052	XYM_085	ORF	melanogaster	Lab	Kimbrell	Guts	Proteobacteria	Gammaproteobacteria	Enterobacteriales	Enterobacteriaceae	Providencia
1	ORF_034	XYM_085	ORF	melanogaster	Lab	Kimbrell	Guts	Proteobacteria	Gammaproteobacteria	Enterobacteriales	Enterobacteriaceae	Providencia
1	ORF_084	XYM_085	ORF	melanogaster	Lab	Kimbrell	Guts	Proteobacteria	Gammaproteobacteria	Enterobacteriales	Enterobacteriaceae	Providencia
1	ORF_055	XYM_085	ORF	melanogaster	Lab	Kimbrell	Guts	Proteobacteria	Gammaproteobacteria	Enterobacteriales	Enterobacteriaceae	Providencia
1	ORF_028	XYM_085	ORF	melanogaster	Lab	Kimbrell	Guts	Proteobacteria	Gammaproteobacteria	Enterobacteriales	Enterobacteriaceae	Providencia
1	ORM_073	XYM_085	ORM	melanogaster	Lab	Kimbrell	Guts	Proteobacteria	Gammaproteobacteria	Enterobacteriales	Enterobacteriaceae	Providencia
1	ORM_056	XYM_085	ORM	melanogaster	Lab	Kimbrell	Guts	Proteobacteria	Gammaproteobacteria	Enterobacteriales	Enterobacteriaceae	Providencia
1	ORM_088	XYM_085	ORM	melanogaster	Lab	Kimbrell	Guts	Proteobacteria	Gammaproteobacteria	Enterobacteriales	Enterobacteriaceae	Providencia
1	XDA_020	XYM_085	XDA	melanogaster	Lab	Kopp	Guts	Proteobacteria	Gammaproteobacteria	Enterobacteriales	Enterobacteriaceae	Providencia
1	XDA_030	XYM_085	XDA	melanogaster	Lab	Kopp	Guts	Proteobacteria	Gammaproteobacteria	Enterobacteriales	Enterobacteriaceae	Providencia
1	XDA_080	XYM_085	XDA	melanogaster	Lab	Kopp	Guts	Proteobacteria	Gammaproteobacteria	Enterobacteriales	Enterobacteriaceae	Providencia
1	XDA_051	XYM_085	XDA	melanogaster	Lab	Kopp	Guts	Proteobacteria	Gammaproteobacteria	Enterobacteriales	Enterobacteriaceae	Providencia
1	XDA_022	XYM_085	XDA	melanogaster	Lab	Kopp	Guts	Proteobacteria	Gammaproteobacteria	Enterobacteriales	Enterobacteriaceae	Providencia
1	XDA_043	XYM_085	XDA	melanogaster	Lab	Kopp	Guts	Proteobacteria	Gammaproteobacteria	Enterobacteriales	Enterobacteriaceae	Providencia
1	XDA_103	XYM_085	XDA	melanogaster	Lab	Kopp	Guts	Proteobacteria	Gammaproteobacteria	Enterobacteriales	Enterobacteriaceae	Providencia
1	XDA_024	XYM_085	XDA	melanogaster	Lab	Kopp	Guts	Proteobacteria	Gammaproteobacteria	Enterobacteriales	Enterobacteriaceae	Providencia
1	XDA_115	XYM_085	XDA	melanogaster	Lab	Kopp	Guts	Proteobacteria	Gammaproteobacteria	Enterobacteriales	Enterobacteriaceae	Providencia
1	XDA_026	XYM_085	XDA	melanogaster	Lab	Kopp	Guts	Proteobacteria	Gammaproteobacteria	Enterobacteriales	Enterobacteriaceae	Providencia
1	XDA_036	XYM_085	XDA	melanogaster	Lab	Kopp	Guts	Proteobacteria	Gammaproteobacteria	Enterobacteriales	Enterobacteriaceae	Providencia
1	XDA_028	XYM_085	XDA	melanogaster	Lab	Kopp	Guts	Proteobacteria	Gammaproteobacteria	Enterobacteriales	Enterobacteriaceae	Providencia
1	XDA_029	XYM_085	XDA	melanogaster	Lab	Kopp	Guts	Proteobacteria	Gammaproteobacteria	Enterobacteriales	Enterobacteriaceae	Providencia
1	XDA_049	XYM_085	XDA	melanogaster	Lab	Kopp	Guts	Proteobacteria	Gammaproteobacteria	Enterobacteriales	Enterobacteriaceae	Providencia
1	XDA_069	XYM_085	XDA	melanogaster	Lab	Kopp	Guts	Proteobacteria	Gammaproteobacteria	Enterobacteriales	Enterobacteriaceae	Providencia
1	XDA_119	XYM_085	XDA	melanogaster	Lab	Kopp	Guts	Proteobacteria	Gammaproteobacteria	Enterobacteriales	Enterobacteriaceae	Providencia
1	XDM_071	XYM_085	XDM	melanogaster	Lab	Kopp	Guts	Proteobacteria	Gammaproteobacteria	Enterobacteriales	Enterobacteriaceae	Providencia
1	XDM_111	XYM_085	XDM	melanogaster	Lab	Kopp	Guts	Proteobacteria	Gammaproteobacteria	Enterobacteriales	Enterobacteriaceae	Providencia
1	XDM_022	XYM_085	XDM	melanogaster	Lab	Kopp	Guts	Proteobacteria	Gammaproteobacteria	Enterobacteriales	Enterobacteriaceae	Providencia
1	XDM_072	XYM_085	XDM	melanogaster	Lab	Kopp	Guts	Proteobacteria	Gammaproteobacteria	Enterobacteriales	Enterobacteriaceae	Providencia
1	XDM_047	XYM_085	XDM	melanogaster	Lab	Kopp	Guts	Proteobacteria	Gammaproteobacteria	Enterobacteriales	Enterobacteriaceae	Providencia
1	XDM_087	XYM_085	XDM	melanogaster	Lab	Kopp	Guts	Proteobacteria	Gammaproteobacteria	Enterobacteriales	Enterobacteriaceae	Providencia
1	XDM_097	XYM_085	XDM	melanogaster	Lab	Kopp	Guts	Proteobacteria	Gammaproteobacteria	Enterobacteriales	Enterobacteriaceae	Providencia
1	XDM_117	XYM_085	XDM	melanogaster	Lab	Kopp	Guts	Proteobacteria	Gammaproteobacteria	Enterobacteriales	Enterobacteriaceae	Providencia
1	XDM_098	XYM_085	XDM	melanogaster	Lab	Kopp	Guts	Proteobacteria	Gammaproteobacteria	Enterobacteriales	Enterobacteriaceae	Providencia
1	XDE_010	XYM_085	XDE	melanogaster	Lab	Kopp	Guts	Proteobacteria	Gammaproteobacteria	Enterobacteriales	Enterobacteriaceae	Providencia
1	XDE_020	XYM_085	XDE	melanogaster	Lab	Kopp	Guts	Proteobacteria	Gammaproteobacteria	Enterobacteriales	Enterobacteriaceae	Providencia
1	XDE_030	XYM_085	XDE	melanogaster	Lab	Kopp	Guts	Proteobacteria	Gammaproteobacteria	Enterobacteriales	Enterobacteriaceae	Providencia
1	XDE_050	XYM_085	XDE	melanogaster	Lab	Kopp	Guts	Proteobacteria	Gammaproteobacteria	Enterobacteriales	Enterobacteriaceae	Providencia
1	XDE_080	XYM_085	XDE	melanogaster	Lab	Kopp	Guts	Proteobacteria	Gammaproteobacteria	Enterobacteriales	Enterobacteriaceae	Providencia
1	XDE_100	XYM_085	XDE	melanogaster	Lab	Kopp	Guts	Proteobacteria	Gammaproteobacteria	Enterobacteriales	Enterobacteriaceae	Providencia
1	XDE_110	XYM_085	XDE	melanogaster	Lab	Kopp	Guts	Proteobacteria	Gammaproteobacteria	Enterobacteriales	Enterobacteriaceae	Providencia
1	XDE_011	XYM_085	XDE	melanogaster	Lab	Kopp	Guts	Proteobacteria	Gammaproteobacteria	Enterobacteriales	Enterobacteriaceae	Providencia
1	XDE_021	XYM_085	XDE	melanogaster	Lab	Kopp	Guts	Proteobacteria	Gammaproteobacteria	Enterobacteriales	Enterobacteriaceae	Providencia
1	XDE_031	XYM_085	XDE	melanogaster	Lab	Kopp	Guts	Proteobacteria	Gammaproteobacteria	Enterobacteriales	Enterobacteriaceae	Providencia
1	XDE_061	XYM_085	XDE	melanogaster	Lab	Kopp	Guts	Proteobacteria	Gammaproteobacteria	Enterobacteriales	Enterobacteriaceae	Providencia
1	XDE_111	XYM_085	XDE	melanogaster	Lab	Kopp	Guts	Proteobacteria	Gammaproteobacteria	Enterobacteriales	Enterobacteriaceae	Providencia
1	XDE_052	XYM_085	XDE	melanogaster	Lab	Kopp	Guts	Proteobacteria	Gammaproteobacteria	Enterobacteriales	Enterobacteriaceae	Providencia
1	XDE_082	XYM_085	XDE	melanogaster	Lab	Kopp	Guts	Proteobacteria	Gammaproteobacteria	Enterobacteriales	Enterobacteriaceae	Providencia
1	XDE_102	XYM_085	XDE	melanogaster	Lab	Kopp	Guts	Proteobacteria	Gammaproteobacteria	Enterobacteriales	Enterobacteriaceae	Providencia
1	XDE_122	XYM_085	XDE	melanogaster	Lab	Kopp	Guts	Proteobacteria	Gammaproteobacteria	Enterobacteriales	Enterobacteriaceae	Providencia
1	XDE_023	XYM_085	XDE	melanogaster	Lab	Kopp	Guts	Proteobacteria	Gammaproteobacteria	Enterobacteriales	Enterobacteriaceae	Providencia
1	XDE_053	XYM_085	XDE	melanogaster	Lab	Kopp	Guts	Proteobacteria	Gammaproteobacteria	Enterobacteriales	Enterobacteriaceae	Providencia
1	XDE_063	XYM_085	XDE	melanogaster	Lab	Kopp	Guts	Proteobacteria	Gammaproteobacteria	Enterobacteriales	Enterobacteriaceae	Providencia
1	XDE_083	XYM_085	XDE	melanogaster	Lab	Kopp	Guts	Proteobacteria	Gammaproteobacteria	Enterobacteriales	Enterobacteriaceae	Providencia
1	XDE_103	XYM_085	XDE	melanogaster	Lab	Kopp	Guts	Proteobacteria	Gammaproteobacteria	Enterobacteriales	Enterobacteriaceae	Providencia
1	XDE_113	XYM_085	XDE	melanogaster	Lab	Kopp	Guts	Proteobacteria	Gammaproteobacteria	Enterobacteriales	Enterobacteriaceae	Providencia
1	XDE_014	XYM_085	XDE	melanogaster	Lab	Kopp	Guts	Proteobacteria	Gammaproteobacteria	Enterobacteriales	Enterobacteriaceae	Providencia
1	XDE_034	XYM_085	XDE	melanogaster	Lab	Kopp	Guts	Proteobacteria	Gammaproteobacteria	Enterobacteriales	Enterobacteriaceae	Providencia
1	XDE_094	XYM_085	XDE	melanogaster	Lab	Kopp	Guts	Proteobacteria	Gammaproteobacteria	Enterobacteriales	Enterobacteriaceae	Providencia
1	XDE_114	XYM_085	XDE	melanogaster	Lab	Kopp	Guts	Proteobacteria	Gammaproteobacteria	Enterobacteriales	Enterobacteriaceae	Providencia
1	XDE_124	XYM_085	XDE	melanogaster	Lab	Kopp	Guts	Proteobacteria	Gammaproteobacteria	Enterobacteriales	Enterobacteriaceae	Providencia
1	XDE_015	XYM_085	XDE	melanogaster	Lab	Kopp	Guts	Proteobacteria	Gammaproteobacteria	Enterobacteriales	Enterobacteriaceae	Providencia
1	XDE_055	XYM_085	XDE	melanogaster	Lab	Kopp	Guts	Proteobacteria	Gammaproteobacteria	Enterobacteriales	Enterobacteriaceae	Providencia
1	XDE_065	XYM_085	XDE	melanogaster	Lab	Kopp	Guts	Proteobacteria	Gammaproteobacteria	Enterobacteriales	Enterobacteriaceae	Providencia
1	XDE_075	XYM_085	XDE	melanogaster	Lab	Kopp	Guts	Proteobacteria	Gammaproteobacteria	Enterobacteriales	Enterobacteriaceae	Providencia
1	XDE_085	XYM_085	XDE	melanogaster	Lab	Kopp	Guts	Proteobacteria	Gammaproteobacteria	Enterobacteriales	Enterobacteriaceae	Providencia
1	XDE_105	XYM_085	XDE	melanogaster	Lab	Kopp	Guts	Proteobacteria	Gammaproteobacteria	Enterobacteriales	Enterobacteriaceae	Providencia
1	XDE_115	XYM_085	XDE	melanogaster	Lab	Kopp	Guts	Proteobacteria	Gammaproteobacteria	Enterobacteriales	Enterobacteriaceae	Providencia
1	XDE_125	XYM_085	XDE	melanogaster	Lab	Kopp	Guts	Proteobacteria	Gammaproteobacteria	Enterobacteriales	Enterobacteriaceae	Providencia
1	XDE_026	XYM_085	XDE	melanogaster	Lab	Kopp	Guts	Proteobacteria	Gammaproteobacteria	Enterobacteriales	Enterobacteriaceae	Providencia
1	XDE_036	XYM_085	XDE	melanogaster	Lab	Kopp	Guts	Proteobacteria	Gammaproteobacteria	Enterobacteriales	Enterobacteriaceae	Providencia
1	XDE_056	XYM_085	XDE	melanogaster	Lab	Kopp	Guts	Proteobacteria	Gammaproteobacteria	Enterobacteriales	Enterobacteriaceae	Providencia
1	XDE_076	XYM_085	XDE	melanogaster	Lab	Kopp	Guts	Proteobacteria	Gammaproteobacteria	Enterobacteriales	Enterobacteriaceae	Providencia
1	XDE_086	XYM_085	XDE	melanogaster	Lab	Kopp	Guts	Proteobacteria	Gammaproteobacteria	Enterobacteriales	Enterobacteriaceae	Providencia
1	XDE_096	XYM_085	XDE	melanogaster	Lab	Kopp	Guts	Proteobacteria	Gammaproteobacteria	Enterobacteriales	Enterobacteriaceae	Providencia
1	XDE_106	XYM_085	XDE	melanogaster	Lab	Kopp	Guts	Proteobacteria	Gammaproteobacteria	Enterobacteriales	Enterobacteriaceae	Providencia
1	XDE_116	XYM_085	XDE	melanogaster	Lab	Kopp	Guts	Proteobacteria	Gammaproteobacteria	Enterobacteriales	Enterobacteriaceae	Providencia
1	XDE_127	XYM_085	XDE	melanogaster	Lab	Kopp	Guts	Proteobacteria	Gammaproteobacteria	Enterobacteriales	Enterobacteriaceae	Providencia
1	XDE_017	XYM_085	XDE	melanogaster	Lab	Kopp	Guts	Proteobacteria	Gammaproteobacteria	Enterobacteriales	Enterobacteriaceae	Providencia
1	XDE_047	XYM_085	XDE	melanogaster	Lab	Kopp	Guts	Proteobacteria	Gammaproteobacteria	Enterobacteriales	Enterobacteriaceae	Providencia
1	XDE_087	XYM_085	XDE	melanogaster	Lab	Kopp	Guts	Proteobacteria	Gammaproteobacteria	Enterobacteriales	Enterobacteriaceae	Providencia
1	XDE_117	XYM_085	XDE	melanogaster	Lab	Kopp	Guts	Proteobacteria	Gammaproteobacteria	Enterobacteriales	Enterobacteriaceae	Providencia
1	XDE_028	XYM_085	XDE	melanogaster	Lab	Kopp	Guts	Proteobacteria	Gammaproteobacteria	Enterobacteriales	Enterobacteriaceae	Providencia
1	XDE_038	XYM_085	XDE	melanogaster	Lab	Kopp	Guts	Proteobacteria	Gammaproteobacteria	Enterobacteriales	Enterobacteriaceae	Providencia
1	XDE_048	XYM_085	XDE	melanogaster	Lab	Kopp	Guts	Proteobacteria	Gammaproteobacteria	Enterobacteriales	Enterobacteriaceae	Providencia
1	XDE_088	XYM_085	XDE	melanogaster	Lab	Kopp	Guts	Proteobacteria	Gammaproteobacteria	Enterobacteriales	Enterobacteriaceae	Providencia
1	XDE_108	XYM_085	XDE	melanogaster	Lab	Kopp	Guts	Proteobacteria	Gammaproteobacteria	Enterobacteriales	Enterobacteriaceae	Providencia
1	XDE_118	XYM_085	XDE	melanogaster	Lab	Kopp	Guts	Proteobacteria	Gammaproteobacteria	Enterobacteriales	Enterobacteriaceae	Providencia
1	XDE_019	XYM_085	XDE	melanogaster	Lab	Kopp	Guts	Proteobacteria	Gammaproteobacteria	Enterobacteriales	Enterobacteriaceae	Providencia
1	XDE_079	XYM_085	XDE	melanogaster	Lab	Kopp	Guts	Proteobacteria	Gammaproteobacteria	Enterobacteriales	Enterobacteriaceae	Providencia
1	XDE_099	XYM_085	XDE	melanogaster	Lab	Kopp	Guts	Proteobacteria	Gammaproteobacteria	Enterobacteriales	Enterobacteriaceae	Providencia
1	XDE_119	XYM_085	XDE	melanogaster	Lab	Kopp	Guts	Proteobacteria	Gammaproteobacteria	Enterobacteriales	Enterobacteriaceae	Providencia
1	XDO_010	XYM_085	XDO	melanogaster	Lab	Kopp	Guts	Proteobacteria	Gammaproteobacteria	Enterobacteriales	Enterobacteriaceae	Providencia
1	XDO_020	XYM_085	XDO	melanogaster	Lab	Kopp	Guts	Proteobacteria	Gammaproteobacteria	Enterobacteriales	Enterobacteriaceae	Providencia
1	XDO_080	XYM_085	XDO	melanogaster	Lab	Kopp	Guts	Proteobacteria	Gammaproteobacteria	Enterobacteriales	Enterobacteriaceae	Providencia
1	XDO_220	XYM_085	XDO	melanogaster	Lab	Kopp	Guts	Proteobacteria	Gammaproteobacteria	Enterobacteriales	Enterobacteriaceae	Providencia
1	XDO_240	XYM_085	XDO	melanogaster	Lab	Kopp	Guts	Proteobacteria	Gammaproteobacteria	Enterobacteriales	Enterobacteriaceae	Providencia
1	XDO_260	XYM_085	XDO	melanogaster	Lab	Kopp	Guts	Proteobacteria	Gammaproteobacteria	Enterobacteriales	Enterobacteriaceae	Providencia
1	XDO_181	XYM_085	XDO	melanogaster	Lab	Kopp	Guts	Proteobacteria	Gammaproteobacteria	Enterobacteriales	Enterobacteriaceae	Providencia
1	XDO_261	XYM_085	XDO	melanogaster	Lab	Kopp	Guts	Proteobacteria	Gammaproteobacteria	Enterobacteriales	Enterobacteriaceae	Providencia
1	XDO_072	XYM_085	XDO	melanogaster	Lab	Kopp	Guts	Proteobacteria	Gammaproteobacteria	Enterobacteriales	Enterobacteriaceae	Providencia
1	XDO_152	XYM_085	XDO	melanogaster	Lab	Kopp	Guts	Proteobacteria	Gammaproteobacteria	Enterobacteriales	Enterobacteriaceae	Providencia
1	XDO_043	XYM_085	XDO	melanogaster	Lab	Kopp	Guts	Proteobacteria	Gammaproteobacteria	Enterobacteriales	Enterobacteriaceae	Providencia
1	XDO_243	XYM_085	XDO	melanogaster	Lab	Kopp	Guts	Proteobacteria	Gammaproteobacteria	Enterobacteriales	Enterobacteriaceae	Providencia
1	XDO_273	XYM_085	XDO	melanogaster	Lab	Kopp	Guts	Proteobacteria	Gammaproteobacteria	Enterobacteriales	Enterobacteriaceae	Providencia
1	XDO_154	XYM_085	XDO	melanogaster	Lab	Kopp	Guts	Proteobacteria	Gammaproteobacteria	Enterobacteriales	Enterobacteriaceae	Providencia
1	XDO_194	XYM_085	XDO	melanogaster	Lab	Kopp	Guts	Proteobacteria	Gammaproteobacteria	Enterobacteriales	Enterobacteriaceae	Providencia
1	XDO_244	XYM_085	XDO	melanogaster	Lab	Kopp	Guts	Proteobacteria	Gammaproteobacteria	Enterobacteriales	Enterobacteriaceae	Providencia
1	XDO_215	XYM_085	XDO	melanogaster	Lab	Kopp	Guts	Proteobacteria	Gammaproteobacteria	Enterobacteriales	Enterobacteriaceae	Providencia
1	XDO_046	XYM_085	XDO	melanogaster	Lab	Kopp	Guts	Proteobacteria	Gammaproteobacteria	Enterobacteriales	Enterobacteriaceae	Providencia
1	XDO_067	XYM_085	XDO	melanogaster	Lab	Kopp	Guts	Proteobacteria	Gammaproteobacteria	Enterobacteriales	Enterobacteriaceae	Providencia
1	XDO_018	XYM_085	XDO	melanogaster	Lab	Kopp	Guts	Proteobacteria	Gammaproteobacteria	Enterobacteriales	Enterobacteriaceae	Providencia
1	XDO_038	XYM_085	XDO	melanogaster	Lab	Kopp	Guts	Proteobacteria	Gammaproteobacteria	Enterobacteriales	Enterobacteriaceae	Providencia
1	XDO_068	XYM_085	XDO	melanogaster	Lab	Kopp	Guts	Proteobacteria	Gammaproteobacteria	Enterobacteriales	Enterobacteriaceae	Providencia
1	XDO_158	XYM_085	XDO	melanogaster	Lab	Kopp	Guts	Proteobacteria	Gammaproteobacteria	Enterobacteriales	Enterobacteriaceae	Providencia
1	XDO_178	XYM_085	XDO	melanogaster	Lab	Kopp	Guts	Proteobacteria	Gammaproteobacteria	Enterobacteriales	Enterobacteriaceae	Providencia
1	XDO_208	XYM_085	XDO	melanogaster	Lab	Kopp	Guts	Proteobacteria	Gammaproteobacteria	Enterobacteriales	Enterobacteriaceae	Providencia
1	XDO_268	XYM_085	XDO	melanogaster	Lab	Kopp	Guts	Proteobacteria	Gammaproteobacteria	Enterobacteriales	Enterobacteriaceae	Providencia
1	XDO_039	XYM_085	XDO	melanogaster	Lab	Kopp	Guts	Proteobacteria	Gammaproteobacteria	Enterobacteriales	Enterobacteriaceae	Providencia
1	XDO_089	XYM_085	XDO	melanogaster	Lab	Kopp	Guts	Proteobacteria	Gammaproteobacteria	Enterobacteriales	Enterobacteriaceae	Providencia
1	XDO_259	XYM_085	XDO	melanogaster	Lab	Kopp	Guts	Proteobacteria	Gammaproteobacteria	Enterobacteriales	Enterobacteriaceae	Providencia
1	XDS_030	XYM_085	XDS	melanogaster	Lab	Kopp	Guts	Proteobacteria	Gammaproteobacteria	Enterobacteriales	Enterobacteriaceae	Providencia
1	XDS_050	XYM_085	XDS	melanogaster	Lab	Kopp	Guts	Proteobacteria	Gammaproteobacteria	Enterobacteriales	Enterobacteriaceae	Providencia
1	XDS_060	XYM_085	XDS	melanogaster	Lab	Kopp	Guts	Proteobacteria	Gammaproteobacteria	Enterobacteriales	Enterobacteriaceae	Providencia
1	XDS_070	XYM_085	XDS	melanogaster	Lab	Kopp	Guts	Proteobacteria	Gammaproteobacteria	Enterobacteriales	Enterobacteriaceae	Providencia
1	XDS_080	XYM_085	XDS	melanogaster	Lab	Kopp	Guts	Proteobacteria	Gammaproteobacteria	Enterobacteriales	Enterobacteriaceae	Providencia
1	XDS_090	XYM_085	XDS	melanogaster	Lab	Kopp	Guts	Proteobacteria	Gammaproteobacteria	Enterobacteriales	Enterobacteriaceae	Providencia
1	XDS_100	XYM_085	XDS	melanogaster	Lab	Kopp	Guts	Proteobacteria	Gammaproteobacteria	Enterobacteriales	Enterobacteriaceae	Providencia
1	XDS_001	XYM_085	XDS	melanogaster	Lab	Kopp	Guts	Proteobacteria	Gammaproteobacteria	Enterobacteriales	Enterobacteriaceae	Providencia
1	XDS_021	XYM_085	XDS	melanogaster	Lab	Kopp	Guts	Proteobacteria	Gammaproteobacteria	Enterobacteriales	Enterobacteriaceae	Providencia
1	XDS_031	XYM_085	XDS	melanogaster	Lab	Kopp	Guts	Proteobacteria	Gammaproteobacteria	Enterobacteriales	Enterobacteriaceae	Providencia
1	XDS_051	XYM_085	XDS	melanogaster	Lab	Kopp	Guts	Proteobacteria	Gammaproteobacteria	Enterobacteriales	Enterobacteriaceae	Providencia
1	XDS_081	XYM_085	XDS	melanogaster	Lab	Kopp	Guts	Proteobacteria	Gammaproteobacteria	Enterobacteriales	Enterobacteriaceae	Providencia
1	XDS_091	XYM_085	XDS	melanogaster	Lab	Kopp	Guts	Proteobacteria	Gammaproteobacteria	Enterobacteriales	Enterobacteriaceae	Providencia
1	XDS_101	XYM_085	XDS	melanogaster	Lab	Kopp	Guts	Proteobacteria	Gammaproteobacteria	Enterobacteriales	Enterobacteriaceae	Providencia
1	XDS_002	XYM_085	XDS	melanogaster	Lab	Kopp	Guts	Proteobacteria	Gammaproteobacteria	Enterobacteriales	Enterobacteriaceae	Providencia
1	XDS_022	XYM_085	XDS	melanogaster	Lab	Kopp	Guts	Proteobacteria	Gammaproteobacteria	Enterobacteriales	Enterobacteriaceae	Providencia
1	XDS_042	XYM_085	XDS	melanogaster	Lab	Kopp	Guts	Proteobacteria	Gammaproteobacteria	Enterobacteriales	Enterobacteriaceae	Providencia
1	XDS_052	XYM_085	XDS	melanogaster	Lab	Kopp	Guts	Proteobacteria	Gammaproteobacteria	Enterobacteriales	Enterobacteriaceae	Providencia
1	XDS_082	XYM_085	XDS	melanogaster	Lab	Kopp	Guts	Proteobacteria	Gammaproteobacteria	Enterobacteriales	Enterobacteriaceae	Providencia
1	XDS_102	XYM_085	XDS	melanogaster	Lab	Kopp	Guts	Proteobacteria	Gammaproteobacteria	Enterobacteriales	Enterobacteriaceae	Providencia
1	XDS_112	XYM_085	XDS	melanogaster	Lab	Kopp	Guts	Proteobacteria	Gammaproteobacteria	Enterobacteriales	Enterobacteriaceae	Providencia
1	XDS_003	XYM_085	XDS	melanogaster	Lab	Kopp	Guts	Proteobacteria	Gammaproteobacteria	Enterobacteriales	Enterobacteriaceae	Providencia
1	XDS_013	XYM_085	XDS	melanogaster	Lab	Kopp	Guts	Proteobacteria	Gammaproteobacteria	Enterobacteriales	Enterobacteriaceae	Providencia
1	XDS_023	XYM_085	XDS	melanogaster	Lab	Kopp	Guts	Proteobacteria	Gammaproteobacteria	Enterobacteriales	Enterobacteriaceae	Providencia
1	XDS_043	XYM_085	XDS	melanogaster	Lab	Kopp	Guts	Proteobacteria	Gammaproteobacteria	Enterobacteriales	Enterobacteriaceae	Providencia
1	XDS_053	XYM_085	XDS	melanogaster	Lab	Kopp	Guts	Proteobacteria	Gammaproteobacteria	Enterobacteriales	Enterobacteriaceae	Providencia
1	XDS_063	XYM_085	XDS	melanogaster	Lab	Kopp	Guts	Proteobacteria	Gammaproteobacteria	Enterobacteriales	Enterobacteriaceae	Providencia
1	XDS_073	XYM_085	XDS	melanogaster	Lab	Kopp	Guts	Proteobacteria	Gammaproteobacteria	Enterobacteriales	Enterobacteriaceae	Providencia
1	XDS_083	XYM_085	XDS	melanogaster	Lab	Kopp	Guts	Proteobacteria	Gammaproteobacteria	Enterobacteriales	Enterobacteriaceae	Providencia
1	XDS_093	XYM_085	XDS	melanogaster	Lab	Kopp	Guts	Proteobacteria	Gammaproteobacteria	Enterobacteriales	Enterobacteriaceae	Providencia
1	XDS_113	XYM_085	XDS	melanogaster	Lab	Kopp	Guts	Proteobacteria	Gammaproteobacteria	Enterobacteriales	Enterobacteriaceae	Providencia
1	XDS_004	XYM_085	XDS	melanogaster	Lab	Kopp	Guts	Proteobacteria	Gammaproteobacteria	Enterobacteriales	Enterobacteriaceae	Providencia
1	XDS_034	XYM_085	XDS	melanogaster	Lab	Kopp	Guts	Proteobacteria	Gammaproteobacteria	Enterobacteriales	Enterobacteriaceae	Providencia
1	XDS_044	XYM_085	XDS	melanogaster	Lab	Kopp	Guts	Proteobacteria	Gammaproteobacteria	Enterobacteriales	Enterobacteriaceae	Providencia
1	XDS_054	XYM_085	XDS	melanogaster	Lab	Kopp	Guts	Proteobacteria	Gammaproteobacteria	Enterobacteriales	Enterobacteriaceae	Providencia
1	XDS_064	XYM_085	XDS	melanogaster	Lab	Kopp	Guts	Proteobacteria	Gammaproteobacteria	Enterobacteriales	Enterobacteriaceae	Providencia
1	XDS_074	XYM_085	XDS	melanogaster	Lab	Kopp	Guts	Proteobacteria	Gammaproteobacteria	Enterobacteriales	Enterobacteriaceae	Providencia
1	XDS_084	XYM_085	XDS	melanogaster	Lab	Kopp	Guts	Proteobacteria	Gammaproteobacteria	Enterobacteriales	Enterobacteriaceae	Providencia
1	XDS_114	XYM_085	XDS	melanogaster	Lab	Kopp	Guts	Proteobacteria	Gammaproteobacteria	Enterobacteriales	Enterobacteriaceae	Providencia
1	XDS_124	XYM_085	XDS	melanogaster	Lab	Kopp	Guts	Proteobacteria	Gammaproteobacteria	Enterobacteriales	Enterobacteriaceae	Providencia
1	XDS_035	XYM_085	XDS	melanogaster	Lab	Kopp	Guts	Proteobacteria	Gammaproteobacteria	Enterobacteriales	Enterobacteriaceae	Providencia
1	XDS_045	XYM_085	XDS	melanogaster	Lab	Kopp	Guts	Proteobacteria	Gammaproteobacteria	Enterobacteriales	Enterobacteriaceae	Providencia
1	XDS_065	XYM_085	XDS	melanogaster	Lab	Kopp	Guts	Proteobacteria	Gammaproteobacteria	Enterobacteriales	Enterobacteriaceae	Providencia
1	XDS_095	XYM_085	XDS	melanogaster	Lab	Kopp	Guts	Proteobacteria	Gammaproteobacteria	Enterobacteriales	Enterobacteriaceae	Providencia
1	XDS_105	XYM_085	XDS	melanogaster	Lab	Kopp	Guts	Proteobacteria	Gammaproteobacteria	Enterobacteriales	Enterobacteriaceae	Providencia
1	XDS_125	XYM_085	XDS	melanogaster	Lab	Kopp	Guts	Proteobacteria	Gammaproteobacteria	Enterobacteriales	Enterobacteriaceae	Providencia
1	XDS_006	XYM_085	XDS	melanogaster	Lab	Kopp	Guts	Proteobacteria	Gammaproteobacteria	Enterobacteriales	Enterobacteriaceae	Providencia
1	XDS_016	XYM_085	XDS	melanogaster	Lab	Kopp	Guts	Proteobacteria	Gammaproteobacteria	Enterobacteriales	Enterobacteriaceae	Providencia
1	XDS_066	XYM_085	XDS	melanogaster	Lab	Kopp	Guts	Proteobacteria	Gammaproteobacteria	Enterobacteriales	Enterobacteriaceae	Providencia
1	XDS_086	XYM_085	XDS	melanogaster	Lab	Kopp	Guts	Proteobacteria	Gammaproteobacteria	Enterobacteriales	Enterobacteriaceae	Providencia
1	XDS_096	XYM_085	XDS	melanogaster	Lab	Kopp	Guts	Proteobacteria	Gammaproteobacteria	Enterobacteriales	Enterobacteriaceae	Providencia
1	XDS_116	XYM_085	XDS	melanogaster	Lab	Kopp	Guts	Proteobacteria	Gammaproteobacteria	Enterobacteriales	Enterobacteriaceae	Providencia
1	XDS_126	XYM_085	XDS	melanogaster	Lab	Kopp	Guts	Proteobacteria	Gammaproteobacteria	Enterobacteriales	Enterobacteriaceae	Providencia
1	XDS_007	XYM_085	XDS	melanogaster	Lab	Kopp	Guts	Proteobacteria	Gammaproteobacteria	Enterobacteriales	Enterobacteriaceae	Providencia
1	XDS_027	XYM_085	XDS	melanogaster	Lab	Kopp	Guts	Proteobacteria	Gammaproteobacteria	Enterobacteriales	Enterobacteriaceae	Providencia
1	XDS_037	XYM_085	XDS	melanogaster	Lab	Kopp	Guts	Proteobacteria	Gammaproteobacteria	Enterobacteriales	Enterobacteriaceae	Providencia
1	XDS_047	XYM_085	XDS	melanogaster	Lab	Kopp	Guts	Proteobacteria	Gammaproteobacteria	Enterobacteriales	Enterobacteriaceae	Providencia
1	XDS_057	XYM_085	XDS	melanogaster	Lab	Kopp	Guts	Proteobacteria	Gammaproteobacteria	Enterobacteriales	Enterobacteriaceae	Providencia
1	XDS_067	XYM_085	XDS	melanogaster	Lab	Kopp	Guts	Proteobacteria	Gammaproteobacteria	Enterobacteriales	Enterobacteriaceae	Providencia
1	XDS_077	XYM_085	XDS	melanogaster	Lab	Kopp	Guts	Proteobacteria	Gammaproteobacteria	Enterobacteriales	Enterobacteriaceae	Providencia
1	XDS_097	XYM_085	XDS	melanogaster	Lab	Kopp	Guts	Proteobacteria	Gammaproteobacteria	Enterobacteriales	Enterobacteriaceae	Providencia
1	XDS_107	XYM_085	XDS	melanogaster	Lab	Kopp	Guts	Proteobacteria	Gammaproteobacteria	Enterobacteriales	Enterobacteriaceae	Providencia
1	XDS_117	XYM_085	XDS	melanogaster	Lab	Kopp	Guts	Proteobacteria	Gammaproteobacteria	Enterobacteriales	Enterobacteriaceae	Providencia
1	XDS_028	XYM_085	XDS	melanogaster	Lab	Kopp	Guts	Proteobacteria	Gammaproteobacteria	Enterobacteriales	Enterobacteriaceae	Providencia
1	XDS_038	XYM_085	XDS	melanogaster	Lab	Kopp	Guts	Proteobacteria	Gammaproteobacteria	Enterobacteriales	Enterobacteriaceae	Providencia
1	XDS_048	XYM_085	XDS	melanogaster	Lab	Kopp	Guts	Proteobacteria	Gammaproteobacteria	Enterobacteriales	Enterobacteriaceae	Providencia
1	XDS_068	XYM_085	XDS	melanogaster	Lab	Kopp	Guts	Proteobacteria	Gammaproteobacteria	Enterobacteriales	Enterobacteriaceae	Providencia
1	XDS_078	XYM_085	XDS	melanogaster	Lab	Kopp	Guts	Proteobacteria	Gammaproteobacteria	Enterobacteriales	Enterobacteriaceae	Providencia
1	XDS_098	XYM_085	XDS	melanogaster	Lab	Kopp	Guts	Proteobacteria	Gammaproteobacteria	Enterobacteriales	Enterobacteriaceae	Providencia
1	XDS_108	XYM_085	XDS	melanogaster	Lab	Kopp	Guts	Proteobacteria	Gammaproteobacteria	Enterobacteriales	Enterobacteriaceae	Providencia
1	XDS_019	XYM_085	XDS	melanogaster	Lab	Kopp	Guts	Proteobacteria	Gammaproteobacteria	Enterobacteriales	Enterobacteriaceae	Providencia
1	XDS_029	XYM_085	XDS	melanogaster	Lab	Kopp	Guts	Proteobacteria	Gammaproteobacteria	Enterobacteriales	Enterobacteriaceae	Providencia
1	XDS_039	XYM_085	XDS	melanogaster	Lab	Kopp	Guts	Proteobacteria	Gammaproteobacteria	Enterobacteriales	Enterobacteriaceae	Providencia
1	XDS_049	XYM_085	XDS	melanogaster	Lab	Kopp	Guts	Proteobacteria	Gammaproteobacteria	Enterobacteriales	Enterobacteriaceae	Providencia
1	XDS_059	XYM_085	XDS	melanogaster	Lab	Kopp	Guts	Proteobacteria	Gammaproteobacteria	Enterobacteriales	Enterobacteriaceae	Providencia
1	XDS_079	XYM_085	XDS	melanogaster	Lab	Kopp	Guts	Proteobacteria	Gammaproteobacteria	Enterobacteriales	Enterobacteriaceae	Providencia
1	XDS_089	XYM_085	XDS	melanogaster	Lab	Kopp	Guts	Proteobacteria	Gammaproteobacteria	Enterobacteriales	Enterobacteriaceae	Providencia
1	XDS_109	XYM_085	XDS	melanogaster	Lab	Kopp	Guts	Proteobacteria	Gammaproteobacteria	Enterobacteriales	Enterobacteriaceae	Providencia
1	XDS_119	XYM_085	XDS	melanogaster	Lab	Kopp	Guts	Proteobacteria	Gammaproteobacteria	Enterobacteriales	Enterobacteriaceae	Providencia
1	XDY_110	XYM_085	XDY	melanogaster	Lab	Kopp	Guts	Proteobacteria	Gammaproteobacteria	Enterobacteriales	Enterobacteriaceae	Providencia
1	XDY_052	XYM_085	XDY	melanogaster	Lab	Kopp	Guts	Proteobacteria	Gammaproteobacteria	Enterobacteriales	Enterobacteriaceae	Providencia
1	XDY_014	XYM_085	XDY	melanogaster	Lab	Kopp	Guts	Proteobacteria	Gammaproteobacteria	Enterobacteriales	Enterobacteriaceae	Providencia
1	XDY_044	XYM_085	XDY	melanogaster	Lab	Kopp	Guts	Proteobacteria	Gammaproteobacteria	Enterobacteriales	Enterobacteriaceae	Providencia
1	XDY_066	XYM_085	XDY	melanogaster	Lab	Kopp	Guts	Proteobacteria	Gammaproteobacteria	Enterobacteriales	Enterobacteriaceae	Providencia
1	XDY_087	XYM_085	XDY	melanogaster	Lab	Kopp	Guts	Proteobacteria	Gammaproteobacteria	Enterobacteriales	Enterobacteriaceae	Providencia
1	XDY_048	XYM_085	XDY	melanogaster	Lab	Kopp	Guts	Proteobacteria	Gammaproteobacteria	Enterobacteriales	Enterobacteriaceae	Providencia
1	XDY_069	XYM_085	XDY	melanogaster	Lab	Kopp	Guts	Proteobacteria	Gammaproteobacteria	Enterobacteriales	Enterobacteriaceae	Providencia
1	XYM_030	XYM_085	XYM	melanogaster	Lab	Kopp	Guts	Proteobacteria	Gammaproteobacteria	Enterobacteriales	Enterobacteriaceae	Providencia
1	XYM_040	XYM_085	XYM	melanogaster	Lab	Kopp	Guts	Proteobacteria	Gammaproteobacteria	Enterobacteriales	Enterobacteriaceae	Providencia
1	XYM_070	XYM_085	XYM	melanogaster	Lab	Kopp	Guts	Proteobacteria	Gammaproteobacteria	Enterobacteriales	Enterobacteriaceae	Providencia
1	XYM_090	XYM_085	XYM	melanogaster	Lab	Kopp	Guts	Proteobacteria	Gammaproteobacteria	Enterobacteriales	Enterobacteriaceae	Providencia
1	XYM_110	XYM_085	XYM	melanogaster	Lab	Kopp	Guts	Proteobacteria	Gammaproteobacteria	Enterobacteriales	Enterobacteriaceae	Providencia
1	XYM_120	XYM_085	XYM	melanogaster	Lab	Kopp	Guts	Proteobacteria	Gammaproteobacteria	Enterobacteriales	Enterobacteriaceae	Providencia
1	XYM_001	XYM_085	XYM	melanogaster	Lab	Kopp	Guts	Proteobacteria	Gammaproteobacteria	Enterobacteriales	Enterobacteriaceae	Providencia
1	XYM_011	XYM_085	XYM	melanogaster	Lab	Kopp	Guts	Proteobacteria	Gammaproteobacteria	Enterobacteriales	Enterobacteriaceae	Providencia
1	XYM_021	XYM_085	XYM	melanogaster	Lab	Kopp	Guts	Proteobacteria	Gammaproteobacteria	Enterobacteriales	Enterobacteriaceae	Providencia
1	XYM_031	XYM_085	XYM	melanogaster	Lab	Kopp	Guts	Proteobacteria	Gammaproteobacteria	Enterobacteriales	Enterobacteriaceae	Providencia
1	XYM_041	XYM_085	XYM	melanogaster	Lab	Kopp	Guts	Proteobacteria	Gammaproteobacteria	Enterobacteriales	Enterobacteriaceae	Providencia
1	XYM_081	XYM_085	XYM	melanogaster	Lab	Kopp	Guts	Proteobacteria	Gammaproteobacteria	Enterobacteriales	Enterobacteriaceae	Providencia
1	XYM_091	XYM_085	XYM	melanogaster	Lab	Kopp	Guts	Proteobacteria	Gammaproteobacteria	Enterobacteriales	Enterobacteriaceae	Providencia
1	XYM_101	XYM_085	XYM	melanogaster	Lab	Kopp	Guts	Proteobacteria	Gammaproteobacteria	Enterobacteriales	Enterobacteriaceae	Providencia
1	XYM_111	XYM_085	XYM	melanogaster	Lab	Kopp	Guts	Proteobacteria	Gammaproteobacteria	Enterobacteriales	Enterobacteriaceae	Providencia
1	XYM_121	XYM_085	XYM	melanogaster	Lab	Kopp	Guts	Proteobacteria	Gammaproteobacteria	Enterobacteriales	Enterobacteriaceae	Providencia
1	XYM_002	XYM_085	XYM	melanogaster	Lab	Kopp	Guts	Proteobacteria	Gammaproteobacteria	Enterobacteriales	Enterobacteriaceae	Providencia
1	XYM_012	XYM_085	XYM	melanogaster	Lab	Kopp	Guts	Proteobacteria	Gammaproteobacteria	Enterobacteriales	Enterobacteriaceae	Providencia
1	XYM_022	XYM_085	XYM	melanogaster	Lab	Kopp	Guts	Proteobacteria	Gammaproteobacteria	Enterobacteriales	Enterobacteriaceae	Providencia
1	XYM_042	XYM_085	XYM	melanogaster	Lab	Kopp	Guts	Proteobacteria	Gammaproteobacteria	Enterobacteriales	Enterobacteriaceae	Providencia
1	XYM_052	XYM_085	XYM	melanogaster	Lab	Kopp	Guts	Proteobacteria	Gammaproteobacteria	Enterobacteriales	Enterobacteriaceae	Providencia
1	XYM_062	XYM_085	XYM	melanogaster	Lab	Kopp	Guts	Proteobacteria	Gammaproteobacteria	Enterobacteriales	Enterobacteriaceae	Providencia
1	XYM_072	XYM_085	XYM	melanogaster	Lab	Kopp	Guts	Proteobacteria	Gammaproteobacteria	Enterobacteriales	Enterobacteriaceae	Providencia
1	XYM_092	XYM_085	XYM	melanogaster	Lab	Kopp	Guts	Proteobacteria	Gammaproteobacteria	Enterobacteriales	Enterobacteriaceae	Providencia
1	XYM_102	XYM_085	XYM	melanogaster	Lab	Kopp	Guts	Proteobacteria	Gammaproteobacteria	Enterobacteriales	Enterobacteriaceae	Providencia
1	XYM_112	XYM_085	XYM	melanogaster	Lab	Kopp	Guts	Proteobacteria	Gammaproteobacteria	Enterobacteriales	Enterobacteriaceae	Providencia
1	XYM_003	XYM_085	XYM	melanogaster	Lab	Kopp	Guts	Proteobacteria	Gammaproteobacteria	Enterobacteriales	Enterobacteriaceae	Providencia
1	XYM_013	XYM_085	XYM	melanogaster	Lab	Kopp	Guts	Proteobacteria	Gammaproteobacteria	Enterobacteriales	Enterobacteriaceae	Providencia
1	XYM_063	XYM_085	XYM	melanogaster	Lab	Kopp	Guts	Proteobacteria	Gammaproteobacteria	Enterobacteriales	Enterobacteriaceae	Providencia
1	XYM_073	XYM_085	XYM	melanogaster	Lab	Kopp	Guts	Proteobacteria	Gammaproteobacteria	Enterobacteriales	Enterobacteriaceae	Providencia
1	XYM_083	XYM_085	XYM	melanogaster	Lab	Kopp	Guts	Proteobacteria	Gammaproteobacteria	Enterobacteriales	Enterobacteriaceae	Providencia
1	XYM_093	XYM_085	XYM	melanogaster	Lab	Kopp	Guts	Proteobacteria	Gammaproteobacteria	Enterobacteriales	Enterobacteriaceae	Providencia
1	XYM_123	XYM_085	XYM	melanogaster	Lab	Kopp	Guts	Proteobacteria	Gammaproteobacteria	Enterobacteriales	Enterobacteriaceae	Providencia
1	XYM_004	XYM_085	XYM	melanogaster	Lab	Kopp	Guts	Proteobacteria	Gammaproteobacteria	Enterobacteriales	Enterobacteriaceae	Providencia
1	XYM_014	XYM_085	XYM	melanogaster	Lab	Kopp	Guts	Proteobacteria	Gammaproteobacteria	Enterobacteriales	Enterobacteriaceae	Providencia
1	XYM_024	XYM_085	XYM	melanogaster	Lab	Kopp	Guts	Proteobacteria	Gammaproteobacteria	Enterobacteriales	Enterobacteriaceae	Providencia
1	XYM_034	XYM_085	XYM	melanogaster	Lab	Kopp	Guts	Proteobacteria	Gammaproteobacteria	Enterobacteriales	Enterobacteriaceae	Providencia
1	XYM_044	XYM_085	XYM	melanogaster	Lab	Kopp	Guts	Proteobacteria	Gammaproteobacteria	Enterobacteriales	Enterobacteriaceae	Providencia
1	XYM_054	XYM_085	XYM	melanogaster	Lab	Kopp	Guts	Proteobacteria	Gammaproteobacteria	Enterobacteriales	Enterobacteriaceae	Providencia
1	XYM_084	XYM_085	XYM	melanogaster	Lab	Kopp	Guts	Proteobacteria	Gammaproteobacteria	Enterobacteriales	Enterobacteriaceae	Providencia
1	XYM_094	XYM_085	XYM	melanogaster	Lab	Kopp	Guts	Proteobacteria	Gammaproteobacteria	Enterobacteriales	Enterobacteriaceae	Providencia
1	XYM_114	XYM_085	XYM	melanogaster	Lab	Kopp	Guts	Proteobacteria	Gammaproteobacteria	Enterobacteriales	Enterobacteriaceae	Providencia
1	XYM_124	XYM_085	XYM	melanogaster	Lab	Kopp	Guts	Proteobacteria	Gammaproteobacteria	Enterobacteriales	Enterobacteriaceae	Providencia
1	XYM_005	XYM_085	XYM	melanogaster	Lab	Kopp	Guts	Proteobacteria	Gammaproteobacteria	Enterobacteriales	Enterobacteriaceae	Providencia
1	XYM_015	XYM_085	XYM	melanogaster	Lab	Kopp	Guts	Proteobacteria	Gammaproteobacteria	Enterobacteriales	Enterobacteriaceae	Providencia
1	XYM_025	XYM_085	XYM	melanogaster	Lab	Kopp	Guts	Proteobacteria	Gammaproteobacteria	Enterobacteriales	Enterobacteriaceae	Providencia
1	XYM_045	XYM_085	XYM	melanogaster	Lab	Kopp	Guts	Proteobacteria	Gammaproteobacteria	Enterobacteriales	Enterobacteriaceae	Providencia
1	XYM_055	XYM_085	XYM	melanogaster	Lab	Kopp	Guts	Proteobacteria	Gammaproteobacteria	Enterobacteriales	Enterobacteriaceae	Providencia
1	XYM_065	XYM_085	XYM	melanogaster	Lab	Kopp	Guts	Proteobacteria	Gammaproteobacteria	Enterobacteriales	Enterobacteriaceae	Providencia
1	XYM_075	XYM_085	XYM	melanogaster	Lab	Kopp	Guts	Proteobacteria	Gammaproteobacteria	Enterobacteriales	Enterobacteriaceae	Providencia
1	XYM_085	XYM_085	XYM	melanogaster	Lab	Kopp	Guts	Proteobacteria	Gammaproteobacteria	Enterobacteriales	Enterobacteriaceae	Providencia
1	XYM_095	XYM_085	XYM	melanogaster	Lab	Kopp	Guts	Proteobacteria	Gammaproteobacteria	Enterobacteriales	Enterobacteriaceae	Providencia
1	XYM_115	XYM_085	XYM	melanogaster	Lab	Kopp	Guts	Proteobacteria	Gammaproteobacteria	Enterobacteriales	Enterobacteriaceae	Providencia
1	XYM_125	XYM_085	XYM	melanogaster	Lab	Kopp	Guts	Proteobacteria	Gammaproteobacteria	Enterobacteriales	Enterobacteriaceae	Providencia
1	XYM_036	XYM_085	XYM	melanogaster	Lab	Kopp	Guts	Proteobacteria	Gammaproteobacteria	Enterobacteriales	Enterobacteriaceae	Providencia
1	XYM_046	XYM_085	XYM	melanogaster	Lab	Kopp	Guts	Proteobacteria	Gammaproteobacteria	Enterobacteriales	Enterobacteriaceae	Providencia
1	XYM_056	XYM_085	XYM	melanogaster	Lab	Kopp	Guts	Proteobacteria	Gammaproteobacteria	Enterobacteriales	Enterobacteriaceae	Providencia
1	XYM_086	XYM_085	XYM	melanogaster	Lab	Kopp	Guts	Proteobacteria	Gammaproteobacteria	Enterobacteriales	Enterobacteriaceae	Providencia
1	XYM_096	XYM_085	XYM	melanogaster	Lab	Kopp	Guts	Proteobacteria	Gammaproteobacteria	Enterobacteriales	Enterobacteriaceae	Providencia
1	XYM_106	XYM_085	XYM	melanogaster	Lab	Kopp	Guts	Proteobacteria	Gammaproteobacteria	Enterobacteriales	Enterobacteriaceae	Providencia
1	XYM_116	XYM_085	XYM	melanogaster	Lab	Kopp	Guts	Proteobacteria	Gammaproteobacteria	Enterobacteriales	Enterobacteriaceae	Providencia
1	XYM_017	XYM_085	XYM	melanogaster	Lab	Kopp	Guts	Proteobacteria	Gammaproteobacteria	Enterobacteriales	Enterobacteriaceae	Providencia
1	XYM_027	XYM_085	XYM	melanogaster	Lab	Kopp	Guts	Proteobacteria	Gammaproteobacteria	Enterobacteriales	Enterobacteriaceae	Providencia
1	XYM_037	XYM_085	XYM	melanogaster	Lab	Kopp	Guts	Proteobacteria	Gammaproteobacteria	Enterobacteriales	Enterobacteriaceae	Providencia
1	XYM_047	XYM_085	XYM	melanogaster	Lab	Kopp	Guts	Proteobacteria	Gammaproteobacteria	Enterobacteriales	Enterobacteriaceae	Providencia
1	XYM_077	XYM_085	XYM	melanogaster	Lab	Kopp	Guts	Proteobacteria	Gammaproteobacteria	Enterobacteriales	Enterobacteriaceae	Providencia
1	XYM_087	XYM_085	XYM	melanogaster	Lab	Kopp	Guts	Proteobacteria	Gammaproteobacteria	Enterobacteriales	Enterobacteriaceae	Providencia
1	XYM_097	XYM_085	XYM	melanogaster	Lab	Kopp	Guts	Proteobacteria	Gammaproteobacteria	Enterobacteriales	Enterobacteriaceae	Providencia
1	XYM_117	XYM_085	XYM	melanogaster	Lab	Kopp	Guts	Proteobacteria	Gammaproteobacteria	Enterobacteriales	Enterobacteriaceae	Providencia
1	XYM_127	XYM_085	XYM	melanogaster	Lab	Kopp	Guts	Proteobacteria	Gammaproteobacteria	Enterobacteriales	Enterobacteriaceae	Providencia
1	XYM_008	XYM_085	XYM	melanogaster	Lab	Kopp	Guts	Proteobacteria	Gammaproteobacteria	Enterobacteriales	Enterobacteriaceae	Providencia
1	XYM_048	XYM_085	XYM	melanogaster	Lab	Kopp	Guts	Proteobacteria	Gammaproteobacteria	Enterobacteriales	Enterobacteriaceae	Providencia
1	XYM_068	XYM_085	XYM	melanogaster	Lab	Kopp	Guts	Proteobacteria	Gammaproteobacteria	Enterobacteriales	Enterobacteriaceae	Providencia
1	XYM_078	XYM_085	XYM	melanogaster	Lab	Kopp	Guts	Proteobacteria	Gammaproteobacteria	Enterobacteriales	Enterobacteriaceae	Providencia
1	XYM_088	XYM_085	XYM	melanogaster	Lab	Kopp	Guts	Proteobacteria	Gammaproteobacteria	Enterobacteriales	Enterobacteriaceae	Providencia
1	XYM_098	XYM_085	XYM	melanogaster	Lab	Kopp	Guts	Proteobacteria	Gammaproteobacteria	Enterobacteriales	Enterobacteriaceae	Providencia
1	XYM_108	XYM_085	XYM	melanogaster	Lab	Kopp	Guts	Proteobacteria	Gammaproteobacteria	Enterobacteriales	Enterobacteriaceae	Providencia
1	XYM_118	XYM_085	XYM	melanogaster	Lab	Kopp	Guts	Proteobacteria	Gammaproteobacteria	Enterobacteriales	Enterobacteriaceae	Providencia
1	XYM_019	XYM_085	XYM	melanogaster	Lab	Kopp	Guts	Proteobacteria	Gammaproteobacteria	Enterobacteriales	Enterobacteriaceae	Providencia
1	XYM_029	XYM_085	XYM	melanogaster	Lab	Kopp	Guts	Proteobacteria	Gammaproteobacteria	Enterobacteriales	Enterobacteriaceae	Providencia
1	XYM_049	XYM_085	XYM	melanogaster	Lab	Kopp	Guts	Proteobacteria	Gammaproteobacteria	Enterobacteriales	Enterobacteriaceae	Providencia
1	XYM_069	XYM_085	XYM	melanogaster	Lab	Kopp	Guts	Proteobacteria	Gammaproteobacteria	Enterobacteriales	Enterobacteriaceae	Providencia
1	XYM_099	XYM_085	XYM	melanogaster	Lab	Kopp	Guts	Proteobacteria	Gammaproteobacteria	Enterobacteriales	Enterobacteriaceae	Providencia
1	XYM_109	XYM_085	XYM	melanogaster	Lab	Kopp	Guts	Proteobacteria	Gammaproteobacteria	Enterobacteriales	Enterobacteriaceae	Providencia
1	XYM_119	XYM_085	XYM	melanogaster	Lab	Kopp	Guts	Proteobacteria	Gammaproteobacteria	Enterobacteriales	Enterobacteriaceae	Providencia
1	TBB_095	TBB_149	TBB	melanogaster	Wild	Fruit	Guts	Proteobacteria	Gammaproteobacteria	Pseudomonadales	Pseudomonadaceae	Pseudomonas
1	TBB_098	TBB_149	TBB	melanogaster	Wild	Fruit	Guts	Proteobacteria	Gammaproteobacteria	Pseudomonadales	Pseudomonadaceae	Pseudomonas
1	TBB_105	TBB_149	TBB	melanogaster	Wild	Fruit	Guts	Proteobacteria	Gammaproteobacteria	Pseudomonadales	Pseudomonadaceae	Pseudomonas
1	TBB_109	TBB_149	TBB	melanogaster	Wild	Fruit	Guts	Proteobacteria	Gammaproteobacteria	Pseudomonadales	Pseudomonadaceae	Pseudomonas
1	TBB_112	TBB_149	TBB	melanogaster	Wild	Fruit	Guts	Proteobacteria	Gammaproteobacteria	Pseudomonadales	Pseudomonadaceae	Pseudomonas
1	TBB_126	TBB_149	TBB	melanogaster	Wild	Fruit	Guts	Proteobacteria	Gammaproteobacteria	Pseudomonadales	Pseudomonadaceae	Pseudomonas
1	TBB_130	TBB_149	TBB	melanogaster	Wild	Fruit	Guts	Proteobacteria	Gammaproteobacteria	Pseudomonadales	Pseudomonadaceae	Pseudomonas
1	TBB_132	TBB_149	TBB	melanogaster	Wild	Fruit	Guts	Proteobacteria	Gammaproteobacteria	Pseudomonadales	Pseudomonadaceae	Pseudomonas
1	TBB_135	TBB_149	TBB	melanogaster	Wild	Fruit	Guts	Proteobacteria	Gammaproteobacteria	Pseudomonadales	Pseudomonadaceae	Pseudomonas
1	TBB_136	TBB_149	TBB	melanogaster	Wild	Fruit	Guts	Proteobacteria	Gammaproteobacteria	Pseudomonadales	Pseudomonadaceae	Pseudomonas
1	TBB_137	TBB_149	TBB	melanogaster	Wild	Fruit	Guts	Proteobacteria	Gammaproteobacteria	Pseudomonadales	Pseudomonadaceae	Pseudomonas
1	TBB_146	TBB_149	TBB	melanogaster	Wild	Fruit	Guts	Proteobacteria	Gammaproteobacteria	Pseudomonadales	Pseudomonadaceae	Pseudomonas
1	TBB_149	TBB_149	TBB	melanogaster	Wild	Fruit	Guts	Proteobacteria	Gammaproteobacteria	Pseudomonadales	Pseudomonadaceae	Pseudomonas
1	TBB_157	TBB_149	TBB	melanogaster	Wild	Fruit	Guts	Proteobacteria	Gammaproteobacteria	Pseudomonadales	Pseudomonadaceae	Pseudomonas
1	TBB_158	TBB_149	TBB	melanogaster	Wild	Fruit	Guts	Proteobacteria	Gammaproteobacteria	Pseudomonadales	Pseudomonadaceae	Pseudomonas
1	TBB_165	TBB_149	TBB	melanogaster	Wild	Fruit	Guts	Proteobacteria	Gammaproteobacteria	Pseudomonadales	Pseudomonadaceae	Pseudomonas
1	TBB_170	TBB_149	TBB	melanogaster	Wild	Fruit	Guts	Proteobacteria	Gammaproteobacteria	Pseudomonadales	Pseudomonadaceae	Pseudomonas
1	TBB_177	TBB_149	TBB	melanogaster	Wild	Fruit	Guts	Proteobacteria	Gammaproteobacteria	Pseudomonadales	Pseudomonadaceae	Pseudomonas
1	TBB_183	TBB_149	TBB	melanogaster	Wild	Fruit	Guts	Proteobacteria	Gammaproteobacteria	Pseudomonadales	Pseudomonadaceae	Pseudomonas
1	TBB_300	TBB_149	TBB	melanogaster	Wild	Fruit	Guts	Proteobacteria	Gammaproteobacteria	Pseudomonadales	Pseudomonadaceae	Pseudomonas
1	TBB_312	TBB_149	TBB	melanogaster	Wild	Fruit	Guts	Proteobacteria	Gammaproteobacteria	Pseudomonadales	Pseudomonadaceae	Pseudomonas
1	TBB_316	TBB_149	TBB	melanogaster	Wild	Fruit	Guts	Proteobacteria	Gammaproteobacteria	Pseudomonadales	Pseudomonadaceae	Pseudomonas
1	TBB_320	TBB_149	TBB	melanogaster	Wild	Fruit	Guts	Proteobacteria	Gammaproteobacteria	Pseudomonadales	Pseudomonadaceae	Pseudomonas
1	TBB_322	TBB_149	TBB	melanogaster	Wild	Fruit	Guts	Proteobacteria	Gammaproteobacteria	Pseudomonadales	Pseudomonadaceae	Pseudomonas
1	TBB_338	TBB_149	TBB	melanogaster	Wild	Fruit	Guts	Proteobacteria	Gammaproteobacteria	Pseudomonadales	Pseudomonadaceae	Pseudomonas
1	TBB_339	TBB_149	TBB	melanogaster	Wild	Fruit	Guts	Proteobacteria	Gammaproteobacteria	Pseudomonadales	Pseudomonadaceae	Pseudomonas
1	TBB_344	TBB_149	TBB	melanogaster	Wild	Fruit	Guts	Proteobacteria	Gammaproteobacteria	Pseudomonadales	Pseudomonadaceae	Pseudomonas
1	TBB_362	TBB_149	TBB	melanogaster	Wild	Fruit	Guts	Proteobacteria	Gammaproteobacteria	Pseudomonadales	Pseudomonadaceae	Pseudomonas
1	TBB_368	TBB_149	TBB	melanogaster	Wild	Fruit	Guts	Proteobacteria	Gammaproteobacteria	Pseudomonadales	Pseudomonadaceae	Pseudomonas
1	TBB_376	TBB_149	TBB	melanogaster	Wild	Fruit	Guts	Proteobacteria	Gammaproteobacteria	Pseudomonadales	Pseudomonadaceae	Pseudomonas
1	TBB_469	TBB_149	TBB	melanogaster	Wild	Fruit	Guts	Proteobacteria	Gammaproteobacteria	Pseudomonadales	Pseudomonadaceae	Pseudomonas
1	ORF_012	ORM_089	ORF	melanogaster	Lab	Kimbrell	Guts	Proteobacteria	Gammaproteobacteria	Enterobacteriales	Enterobacteriaceae	Serratia
1	ORF_054	ORM_089	ORF	melanogaster	Lab	Kimbrell	Guts	Proteobacteria	Gammaproteobacteria	Enterobacteriales	Enterobacteriaceae	Serratia
1	ORF_036	ORM_089	ORF	melanogaster	Lab	Kimbrell	Guts	Proteobacteria	Gammaproteobacteria	Enterobacteriales	Enterobacteriaceae	Serratia
1	ORM_030	ORM_089	ORM	melanogaster	Lab	Kimbrell	Guts	Proteobacteria	Gammaproteobacteria	Enterobacteriales	Enterobacteriaceae	Serratia
1	ORM_060	ORM_089	ORM	melanogaster	Lab	Kimbrell	Guts	Proteobacteria	Gammaproteobacteria	Enterobacteriales	Enterobacteriaceae	Serratia
1	ORM_013	ORM_089	ORM	melanogaster	Lab	Kimbrell	Guts	Proteobacteria	Gammaproteobacteria	Enterobacteriales	Enterobacteriaceae	Serratia
1	ORM_023	ORM_089	ORM	melanogaster	Lab	Kimbrell	Guts	Proteobacteria	Gammaproteobacteria	Enterobacteriales	Enterobacteriaceae	Serratia
1	ORM_063	ORM_089	ORM	melanogaster	Lab	Kimbrell	Guts	Proteobacteria	Gammaproteobacteria	Enterobacteriales	Enterobacteriaceae	Serratia
1	ORM_083	ORM_089	ORM	melanogaster	Lab	Kimbrell	Guts	Proteobacteria	Gammaproteobacteria	Enterobacteriales	Enterobacteriaceae	Serratia
1	ORM_093	ORM_089	ORM	melanogaster	Lab	Kimbrell	Guts	Proteobacteria	Gammaproteobacteria	Enterobacteriales	Enterobacteriaceae	Serratia
1	ORM_024	ORM_089	ORM	melanogaster	Lab	Kimbrell	Guts	Proteobacteria	Gammaproteobacteria	Enterobacteriales	Enterobacteriaceae	Serratia
1	ORM_005	ORM_089	ORM	melanogaster	Lab	Kimbrell	Guts	Proteobacteria	Gammaproteobacteria	Enterobacteriales	Enterobacteriaceae	Serratia
1	ORM_045	ORM_089	ORM	melanogaster	Lab	Kimbrell	Guts	Proteobacteria	Gammaproteobacteria	Enterobacteriales	Enterobacteriaceae	Serratia
1	ORM_085	ORM_089	ORM	melanogaster	Lab	Kimbrell	Guts	Proteobacteria	Gammaproteobacteria	Enterobacteriales	Enterobacteriaceae	Serratia
1	ORM_095	ORM_089	ORM	melanogaster	Lab	Kimbrell	Guts	Proteobacteria	Gammaproteobacteria	Enterobacteriales	Enterobacteriaceae	Serratia
1	ORM_006	ORM_089	ORM	melanogaster	Lab	Kimbrell	Guts	Proteobacteria	Gammaproteobacteria	Enterobacteriales	Enterobacteriaceae	Serratia
1	ORM_026	ORM_089	ORM	melanogaster	Lab	Kimbrell	Guts	Proteobacteria	Gammaproteobacteria	Enterobacteriales	Enterobacteriaceae	Serratia
1	ORM_076	ORM_089	ORM	melanogaster	Lab	Kimbrell	Guts	Proteobacteria	Gammaproteobacteria	Enterobacteriales	Enterobacteriaceae	Serratia
1	ORM_017	ORM_089	ORM	melanogaster	Lab	Kimbrell	Guts	Proteobacteria	Gammaproteobacteria	Enterobacteriales	Enterobacteriaceae	Serratia
1	ORM_039	ORM_089	ORM	melanogaster	Lab	Kimbrell	Guts	Proteobacteria	Gammaproteobacteria	Enterobacteriales	Enterobacteriaceae	Serratia
1	ORM_059	ORM_089	ORM	melanogaster	Lab	Kimbrell	Guts	Proteobacteria	Gammaproteobacteria	Enterobacteriales	Enterobacteriaceae	Serratia
1	ORM_089	ORM_089	ORM	melanogaster	Lab	Kimbrell	Guts	Proteobacteria	Gammaproteobacteria	Enterobacteriales	Enterobacteriaceae	Serratia
1	MAW_039	ORM_089	MAW	melanogaster	Wild	Fruit	Bodies	Proteobacteria	Gammaproteobacteria	Enterobacteriales	Enterobacteriaceae	Serratia
1	TBB_017	ORM_089	TBB	melanogaster	Wild	Fruit	Guts	Proteobacteria	Gammaproteobacteria	Enterobacteriales	Enterobacteriaceae	Serratia
1	TBB_092	ORM_089	TBB	melanogaster	Wild	Fruit	Guts	Proteobacteria	Gammaproteobacteria	Enterobacteriales	Enterobacteriaceae	Serratia
1	TBB_103	ORM_089	TBB	melanogaster	Wild	Fruit	Guts	Proteobacteria	Gammaproteobacteria	Enterobacteriales	Enterobacteriaceae	Serratia
1	TBB_159	ORM_089	TBB	melanogaster	Wild	Fruit	Guts	Proteobacteria	Gammaproteobacteria	Enterobacteriales	Enterobacteriaceae	Serratia
1	TBB_287	ORM_089	TBB	melanogaster	Wild	Fruit	Guts	Proteobacteria	Gammaproteobacteria	Enterobacteriales	Enterobacteriaceae	Serratia
1	TBB_328	ORM_089	TBB	melanogaster	Wild	Fruit	Guts	Proteobacteria	Gammaproteobacteria	Enterobacteriales	Enterobacteriaceae	Serratia
1	TBB_336	ORM_089	TBB	melanogaster	Wild	Fruit	Guts	Proteobacteria	Gammaproteobacteria	Enterobacteriales	Enterobacteriaceae	Serratia
1	TBB_340	ORM_089	TBB	melanogaster	Wild	Fruit	Guts	Proteobacteria	Gammaproteobacteria	Enterobacteriales	Enterobacteriaceae	Serratia
1	TBB_431	ORM_089	TBB	melanogaster	Wild	Fruit	Guts	Proteobacteria	Gammaproteobacteria	Enterobacteriales	Enterobacteriaceae	Serratia
1	TBB_464	ORM_089	TBB	melanogaster	Wild	Fruit	Guts	Proteobacteria	Gammaproteobacteria	Enterobacteriales	Enterobacteriaceae	Serratia
1	MED_015	XYX_081	MED	melanogaster	Lab	Kopp	Media	Proteobacteria	Gammaproteobacteria	Enterobacteriales	Enterobacteriaceae	Serratia
1	MED_018	XYX_081	MED	melanogaster	Lab	Kopp	Media	Proteobacteria	Gammaproteobacteria	Enterobacteriales	Enterobacteriaceae	Serratia
1	MED_021	XYX_081	MED	melanogaster	Lab	Kopp	Media	Proteobacteria	Gammaproteobacteria	Enterobacteriales	Enterobacteriaceae	Serratia
1	ORM_075	XYX_081	ORM	melanogaster	Lab	Kimbrell	Guts	Proteobacteria	Gammaproteobacteria	Enterobacteriales	Enterobacteriaceae	Serratia
1	XYM_076	XYX_081	XYM	melanogaster	Lab	Kopp	Guts	Proteobacteria	Gammaproteobacteria	Enterobacteriales	Enterobacteriaceae	Serratia
1	XYM_100	XYX_081	XYM	melanogaster	Lab	Kopp	Guts	Proteobacteria	Gammaproteobacteria	Enterobacteriales	Enterobacteriaceae	Serratia
1	XYM_103	XYX_081	XYM	melanogaster	Lab	Kopp	Guts	Proteobacteria	Gammaproteobacteria	Enterobacteriales	Enterobacteriaceae	Serratia
1	CAN_040	CAN_007	CAN	melanogaster	Lab	Kimbrell	Guts	Proteobacteria	Gammaproteobacteria	Enterobacteriales	Enterobacteriaceae	Shigella
1	CAN_050	CAN_007	CAN	melanogaster	Lab	Kimbrell	Guts	Proteobacteria	Gammaproteobacteria	Enterobacteriales	Enterobacteriaceae	Shigella
1	CAN_060	CAN_007	CAN	melanogaster	Lab	Kimbrell	Guts	Proteobacteria	Gammaproteobacteria	Enterobacteriales	Enterobacteriaceae	Shigella
1	CAN_080	CAN_007	CAN	melanogaster	Lab	Kimbrell	Guts	Proteobacteria	Gammaproteobacteria	Enterobacteriales	Enterobacteriaceae	Shigella
1	CAN_090	CAN_007	CAN	melanogaster	Lab	Kimbrell	Guts	Proteobacteria	Gammaproteobacteria	Enterobacteriales	Enterobacteriaceae	Shigella
1	CAN_001	CAN_007	CAN	melanogaster	Lab	Kimbrell	Guts	Proteobacteria	Gammaproteobacteria	Enterobacteriales	Enterobacteriaceae	Shigella
1	CAN_051	CAN_007	CAN	melanogaster	Lab	Kimbrell	Guts	Proteobacteria	Gammaproteobacteria	Enterobacteriales	Enterobacteriaceae	Shigella
1	CAN_091	CAN_007	CAN	melanogaster	Lab	Kimbrell	Guts	Proteobacteria	Gammaproteobacteria	Enterobacteriales	Enterobacteriaceae	Shigella
1	CAN_022	CAN_007	CAN	melanogaster	Lab	Kimbrell	Guts	Proteobacteria	Gammaproteobacteria	Enterobacteriales	Enterobacteriaceae	Shigella
1	CAN_032	CAN_007	CAN	melanogaster	Lab	Kimbrell	Guts	Proteobacteria	Gammaproteobacteria	Enterobacteriales	Enterobacteriaceae	Shigella
1	CAN_052	CAN_007	CAN	melanogaster	Lab	Kimbrell	Guts	Proteobacteria	Gammaproteobacteria	Enterobacteriales	Enterobacteriaceae	Shigella
1	CAN_082	CAN_007	CAN	melanogaster	Lab	Kimbrell	Guts	Proteobacteria	Gammaproteobacteria	Enterobacteriales	Enterobacteriaceae	Shigella
1	CAN_092	CAN_007	CAN	melanogaster	Lab	Kimbrell	Guts	Proteobacteria	Gammaproteobacteria	Enterobacteriales	Enterobacteriaceae	Shigella
1	CAN_003	CAN_007	CAN	melanogaster	Lab	Kimbrell	Guts	Proteobacteria	Gammaproteobacteria	Enterobacteriales	Enterobacteriaceae	Shigella
1	CAN_033	CAN_007	CAN	melanogaster	Lab	Kimbrell	Guts	Proteobacteria	Gammaproteobacteria	Enterobacteriales	Enterobacteriaceae	Shigella
1	CAN_083	CAN_007	CAN	melanogaster	Lab	Kimbrell	Guts	Proteobacteria	Gammaproteobacteria	Enterobacteriales	Enterobacteriaceae	Shigella
1	CAN_034	CAN_007	CAN	melanogaster	Lab	Kimbrell	Guts	Proteobacteria	Gammaproteobacteria	Enterobacteriales	Enterobacteriaceae	Shigella
1	CAN_074	CAN_007	CAN	melanogaster	Lab	Kimbrell	Guts	Proteobacteria	Gammaproteobacteria	Enterobacteriales	Enterobacteriaceae	Shigella
1	CAN_084	CAN_007	CAN	melanogaster	Lab	Kimbrell	Guts	Proteobacteria	Gammaproteobacteria	Enterobacteriales	Enterobacteriaceae	Shigella
1	CAN_015	CAN_007	CAN	melanogaster	Lab	Kimbrell	Guts	Proteobacteria	Gammaproteobacteria	Enterobacteriales	Enterobacteriaceae	Shigella
1	CAN_025	CAN_007	CAN	melanogaster	Lab	Kimbrell	Guts	Proteobacteria	Gammaproteobacteria	Enterobacteriales	Enterobacteriaceae	Shigella
1	CAN_035	CAN_007	CAN	melanogaster	Lab	Kimbrell	Guts	Proteobacteria	Gammaproteobacteria	Enterobacteriales	Enterobacteriaceae	Shigella
1	CAN_055	CAN_007	CAN	melanogaster	Lab	Kimbrell	Guts	Proteobacteria	Gammaproteobacteria	Enterobacteriales	Enterobacteriaceae	Shigella
1	CAN_065	CAN_007	CAN	melanogaster	Lab	Kimbrell	Guts	Proteobacteria	Gammaproteobacteria	Enterobacteriales	Enterobacteriaceae	Shigella
1	CAN_016	CAN_007	CAN	melanogaster	Lab	Kimbrell	Guts	Proteobacteria	Gammaproteobacteria	Enterobacteriales	Enterobacteriaceae	Shigella
1	CAN_026	CAN_007	CAN	melanogaster	Lab	Kimbrell	Guts	Proteobacteria	Gammaproteobacteria	Enterobacteriales	Enterobacteriaceae	Shigella
1	CAN_066	CAN_007	CAN	melanogaster	Lab	Kimbrell	Guts	Proteobacteria	Gammaproteobacteria	Enterobacteriales	Enterobacteriaceae	Shigella
1	CAN_028	CAN_007	CAN	melanogaster	Lab	Kimbrell	Guts	Proteobacteria	Gammaproteobacteria	Enterobacteriales	Enterobacteriaceae	Shigella
1	CAN_007	CAN_007	CAN	melanogaster	Lab	Kimbrell	Guts	Proteobacteria	Gammaproteobacteria	Enterobacteriales	Enterobacteriaceae	Shigella
1	CAN_027	CAN_007	CAN	melanogaster	Lab	Kimbrell	Guts	Proteobacteria	Gammaproteobacteria	Enterobacteriales	Enterobacteriaceae	Shigella
1	CAN_037	CAN_007	CAN	melanogaster	Lab	Kimbrell	Guts	Proteobacteria	Gammaproteobacteria	Enterobacteriales	Enterobacteriaceae	Shigella
1	CAN_047	CAN_007	CAN	melanogaster	Lab	Kimbrell	Guts	Proteobacteria	Gammaproteobacteria	Enterobacteriales	Enterobacteriaceae	Shigella
1	CAN_067	CAN_007	CAN	melanogaster	Lab	Kimbrell	Guts	Proteobacteria	Gammaproteobacteria	Enterobacteriales	Enterobacteriaceae	Shigella
1	CAN_008	CAN_007	CAN	melanogaster	Lab	Kimbrell	Guts	Proteobacteria	Gammaproteobacteria	Enterobacteriales	Enterobacteriaceae	Shigella
1	CAN_038	CAN_007	CAN	melanogaster	Lab	Kimbrell	Guts	Proteobacteria	Gammaproteobacteria	Enterobacteriales	Enterobacteriaceae	Shigella
1	CAN_058	CAN_007	CAN	melanogaster	Lab	Kimbrell	Guts	Proteobacteria	Gammaproteobacteria	Enterobacteriales	Enterobacteriaceae	Shigella
1	CAN_009	CAN_007	CAN	melanogaster	Lab	Kimbrell	Guts	Proteobacteria	Gammaproteobacteria	Enterobacteriales	Enterobacteriaceae	Shigella
1	CAN_029	CAN_007	CAN	melanogaster	Lab	Kimbrell	Guts	Proteobacteria	Gammaproteobacteria	Enterobacteriales	Enterobacteriaceae	Shigella
1	CAN_049	CAN_007	CAN	melanogaster	Lab	Kimbrell	Guts	Proteobacteria	Gammaproteobacteria	Enterobacteriales	Enterobacteriaceae	Shigella
1	ORF_001	CAN_007	ORF	melanogaster	Lab	Kimbrell	Guts	Proteobacteria	Gammaproteobacteria	Enterobacteriales	Enterobacteriaceae	Shigella
1	MAH_008	CAN_007	MAH	melanogaster	Wild	Fruit	Guts	Proteobacteria	Gammaproteobacteria	Enterobacteriales	Enterobacteriaceae	Shigella
1	MAH_010	CAN_007	MAH	melanogaster	Wild	Fruit	Guts	Proteobacteria	Gammaproteobacteria	Enterobacteriales	Enterobacteriaceae	Shigella
1	MAH_012	CAN_007	MAH	melanogaster	Wild	Fruit	Guts	Proteobacteria	Gammaproteobacteria	Enterobacteriales	Enterobacteriaceae	Shigella
1	MAH_014	CAN_007	MAH	melanogaster	Wild	Fruit	Guts	Proteobacteria	Gammaproteobacteria	Enterobacteriales	Enterobacteriaceae	Shigella
1	MAH_016	CAN_007	MAH	melanogaster	Wild	Fruit	Guts	Proteobacteria	Gammaproteobacteria	Enterobacteriales	Enterobacteriaceae	Shigella
1	MAH_019	CAN_007	MAH	melanogaster	Wild	Fruit	Guts	Proteobacteria	Gammaproteobacteria	Enterobacteriales	Enterobacteriaceae	Shigella
1	MAH_020	CAN_007	MAH	melanogaster	Wild	Fruit	Guts	Proteobacteria	Gammaproteobacteria	Enterobacteriales	Enterobacteriaceae	Shigella
1	MAH_025	CAN_007	MAH	melanogaster	Wild	Fruit	Guts	Proteobacteria	Gammaproteobacteria	Enterobacteriales	Enterobacteriaceae	Shigella
1	MAH_026	CAN_007	MAH	melanogaster	Wild	Fruit	Guts	Proteobacteria	Gammaproteobacteria	Enterobacteriales	Enterobacteriaceae	Shigella
1	MAH_029	CAN_007	MAH	melanogaster	Wild	Fruit	Guts	Proteobacteria	Gammaproteobacteria	Enterobacteriales	Enterobacteriaceae	Shigella
1	MAH_030	CAN_007	MAH	melanogaster	Wild	Fruit	Guts	Proteobacteria	Gammaproteobacteria	Enterobacteriales	Enterobacteriaceae	Shigella
1	MAH_034	CAN_007	MAH	melanogaster	Wild	Fruit	Guts	Proteobacteria	Gammaproteobacteria	Enterobacteriales	Enterobacteriaceae	Shigella
1	MAH_037	CAN_007	MAH	melanogaster	Wild	Fruit	Guts	Proteobacteria	Gammaproteobacteria	Enterobacteriales	Enterobacteriaceae	Shigella
1	MAH_038	CAN_007	MAH	melanogaster	Wild	Fruit	Guts	Proteobacteria	Gammaproteobacteria	Enterobacteriales	Enterobacteriaceae	Shigella
1	MAH_043	CAN_007	MAH	melanogaster	Wild	Fruit	Guts	Proteobacteria	Gammaproteobacteria	Enterobacteriales	Enterobacteriaceae	Shigella
1	MAH_053	CAN_007	MAH	melanogaster	Wild	Fruit	Guts	Proteobacteria	Gammaproteobacteria	Enterobacteriales	Enterobacteriaceae	Shigella
1	MAH_059	CAN_007	MAH	melanogaster	Wild	Fruit	Guts	Proteobacteria	Gammaproteobacteria	Enterobacteriales	Enterobacteriaceae	Shigella
1	MAH_061	CAN_007	MAH	melanogaster	Wild	Fruit	Guts	Proteobacteria	Gammaproteobacteria	Enterobacteriales	Enterobacteriaceae	Shigella
1	MAH_064	CAN_007	MAH	melanogaster	Wild	Fruit	Guts	Proteobacteria	Gammaproteobacteria	Enterobacteriales	Enterobacteriaceae	Shigella
1	MAH_067	CAN_007	MAH	melanogaster	Wild	Fruit	Guts	Proteobacteria	Gammaproteobacteria	Enterobacteriales	Enterobacteriaceae	Shigella
1	MAH_073	CAN_007	MAH	melanogaster	Wild	Fruit	Guts	Proteobacteria	Gammaproteobacteria	Enterobacteriales	Enterobacteriaceae	Shigella
1	MAH_077	CAN_007	MAH	melanogaster	Wild	Fruit	Guts	Proteobacteria	Gammaproteobacteria	Enterobacteriales	Enterobacteriaceae	Shigella
1	MAH_084	CAN_007	MAH	melanogaster	Wild	Fruit	Guts	Proteobacteria	Gammaproteobacteria	Enterobacteriales	Enterobacteriaceae	Shigella
1	MAH_090	CAN_007	MAH	melanogaster	Wild	Fruit	Guts	Proteobacteria	Gammaproteobacteria	Enterobacteriales	Enterobacteriaceae	Shigella
1	MAH_096	CAN_007	MAH	melanogaster	Wild	Fruit	Guts	Proteobacteria	Gammaproteobacteria	Enterobacteriales	Enterobacteriaceae	Shigella
1	MAH_097	CAN_007	MAH	melanogaster	Wild	Fruit	Guts	Proteobacteria	Gammaproteobacteria	Enterobacteriales	Enterobacteriaceae	Shigella
1	MAH_098	CAN_007	MAH	melanogaster	Wild	Fruit	Guts	Proteobacteria	Gammaproteobacteria	Enterobacteriales	Enterobacteriaceae	Shigella
1	MAH_099	CAN_007	MAH	melanogaster	Wild	Fruit	Guts	Proteobacteria	Gammaproteobacteria	Enterobacteriales	Enterobacteriaceae	Shigella
1	MAH_100	CAN_007	MAH	melanogaster	Wild	Fruit	Guts	Proteobacteria	Gammaproteobacteria	Enterobacteriales	Enterobacteriaceae	Shigella
1	MAH_101	CAN_007	MAH	melanogaster	Wild	Fruit	Guts	Proteobacteria	Gammaproteobacteria	Enterobacteriales	Enterobacteriaceae	Shigella
1	MAH_102	CAN_007	MAH	melanogaster	Wild	Fruit	Guts	Proteobacteria	Gammaproteobacteria	Enterobacteriales	Enterobacteriaceae	Shigella
1	MAH_103	CAN_007	MAH	melanogaster	Wild	Fruit	Guts	Proteobacteria	Gammaproteobacteria	Enterobacteriales	Enterobacteriaceae	Shigella
1	MAH_104	CAN_007	MAH	melanogaster	Wild	Fruit	Guts	Proteobacteria	Gammaproteobacteria	Enterobacteriales	Enterobacteriaceae	Shigella
1	MAH_105	CAN_007	MAH	melanogaster	Wild	Fruit	Guts	Proteobacteria	Gammaproteobacteria	Enterobacteriales	Enterobacteriaceae	Shigella
1	MAH_106	CAN_007	MAH	melanogaster	Wild	Fruit	Guts	Proteobacteria	Gammaproteobacteria	Enterobacteriales	Enterobacteriaceae	Shigella
1	MAH_107	CAN_007	MAH	melanogaster	Wild	Fruit	Guts	Proteobacteria	Gammaproteobacteria	Enterobacteriales	Enterobacteriaceae	Shigella
1	MAH_108	CAN_007	MAH	melanogaster	Wild	Fruit	Guts	Proteobacteria	Gammaproteobacteria	Enterobacteriales	Enterobacteriaceae	Shigella
1	MAH_110	CAN_007	MAH	melanogaster	Wild	Fruit	Guts	Proteobacteria	Gammaproteobacteria	Enterobacteriales	Enterobacteriaceae	Shigella
1	MAH_111	CAN_007	MAH	melanogaster	Wild	Fruit	Guts	Proteobacteria	Gammaproteobacteria	Enterobacteriales	Enterobacteriaceae	Shigella
1	MAH_112	CAN_007	MAH	melanogaster	Wild	Fruit	Guts	Proteobacteria	Gammaproteobacteria	Enterobacteriales	Enterobacteriaceae	Shigella
1	MAH_114	CAN_007	MAH	melanogaster	Wild	Fruit	Guts	Proteobacteria	Gammaproteobacteria	Enterobacteriales	Enterobacteriaceae	Shigella
1	MAH_116	CAN_007	MAH	melanogaster	Wild	Fruit	Guts	Proteobacteria	Gammaproteobacteria	Enterobacteriales	Enterobacteriaceae	Shigella
1	MAH_117	CAN_007	MAH	melanogaster	Wild	Fruit	Guts	Proteobacteria	Gammaproteobacteria	Enterobacteriales	Enterobacteriaceae	Shigella
1	MAH_118	CAN_007	MAH	melanogaster	Wild	Fruit	Guts	Proteobacteria	Gammaproteobacteria	Enterobacteriales	Enterobacteriaceae	Shigella
1	MAH_119	CAN_007	MAH	melanogaster	Wild	Fruit	Guts	Proteobacteria	Gammaproteobacteria	Enterobacteriales	Enterobacteriaceae	Shigella
1	MAH_120	CAN_007	MAH	melanogaster	Wild	Fruit	Guts	Proteobacteria	Gammaproteobacteria	Enterobacteriales	Enterobacteriaceae	Shigella
1	MAH_121	CAN_007	MAH	melanogaster	Wild	Fruit	Guts	Proteobacteria	Gammaproteobacteria	Enterobacteriales	Enterobacteriaceae	Shigella
1	MAH_122	CAN_007	MAH	melanogaster	Wild	Fruit	Guts	Proteobacteria	Gammaproteobacteria	Enterobacteriales	Enterobacteriaceae	Shigella
1	MAH_123	CAN_007	MAH	melanogaster	Wild	Fruit	Guts	Proteobacteria	Gammaproteobacteria	Enterobacteriales	Enterobacteriaceae	Shigella
1	MAH_124	CAN_007	MAH	melanogaster	Wild	Fruit	Guts	Proteobacteria	Gammaproteobacteria	Enterobacteriales	Enterobacteriaceae	Shigella
1	MAH_125	CAN_007	MAH	melanogaster	Wild	Fruit	Guts	Proteobacteria	Gammaproteobacteria	Enterobacteriales	Enterobacteriaceae	Shigella
1	MAH_126	CAN_007	MAH	melanogaster	Wild	Fruit	Guts	Proteobacteria	Gammaproteobacteria	Enterobacteriales	Enterobacteriaceae	Shigella
1	MAH_127	CAN_007	MAH	melanogaster	Wild	Fruit	Guts	Proteobacteria	Gammaproteobacteria	Enterobacteriales	Enterobacteriaceae	Shigella
1	MAH_128	CAN_007	MAH	melanogaster	Wild	Fruit	Guts	Proteobacteria	Gammaproteobacteria	Enterobacteriales	Enterobacteriaceae	Shigella
1	MAH_129	CAN_007	MAH	melanogaster	Wild	Fruit	Guts	Proteobacteria	Gammaproteobacteria	Enterobacteriales	Enterobacteriaceae	Shigella
1	MAH_130	CAN_007	MAH	melanogaster	Wild	Fruit	Guts	Proteobacteria	Gammaproteobacteria	Enterobacteriales	Enterobacteriaceae	Shigella
1	MAH_131	CAN_007	MAH	melanogaster	Wild	Fruit	Guts	Proteobacteria	Gammaproteobacteria	Enterobacteriales	Enterobacteriaceae	Shigella
1	MAH_132	CAN_007	MAH	melanogaster	Wild	Fruit	Guts	Proteobacteria	Gammaproteobacteria	Enterobacteriales	Enterobacteriaceae	Shigella
1	MAH_134	CAN_007	MAH	melanogaster	Wild	Fruit	Guts	Proteobacteria	Gammaproteobacteria	Enterobacteriales	Enterobacteriaceae	Shigella
1	MAH_136	CAN_007	MAH	melanogaster	Wild	Fruit	Guts	Proteobacteria	Gammaproteobacteria	Enterobacteriales	Enterobacteriaceae	Shigella
1	MAH_137	CAN_007	MAH	melanogaster	Wild	Fruit	Guts	Proteobacteria	Gammaproteobacteria	Enterobacteriales	Enterobacteriaceae	Shigella
1	MAH_138	CAN_007	MAH	melanogaster	Wild	Fruit	Guts	Proteobacteria	Gammaproteobacteria	Enterobacteriales	Enterobacteriaceae	Shigella
1	MAH_139	CAN_007	MAH	melanogaster	Wild	Fruit	Guts	Proteobacteria	Gammaproteobacteria	Enterobacteriales	Enterobacteriaceae	Shigella
1	MAH_140	CAN_007	MAH	melanogaster	Wild	Fruit	Guts	Proteobacteria	Gammaproteobacteria	Enterobacteriales	Enterobacteriaceae	Shigella
1	MAH_141	CAN_007	MAH	melanogaster	Wild	Fruit	Guts	Proteobacteria	Gammaproteobacteria	Enterobacteriales	Enterobacteriaceae	Shigella
1	MAH_142	CAN_007	MAH	melanogaster	Wild	Fruit	Guts	Proteobacteria	Gammaproteobacteria	Enterobacteriales	Enterobacteriaceae	Shigella
1	MAH_143	CAN_007	MAH	melanogaster	Wild	Fruit	Guts	Proteobacteria	Gammaproteobacteria	Enterobacteriales	Enterobacteriaceae	Shigella
1	MAH_144	CAN_007	MAH	melanogaster	Wild	Fruit	Guts	Proteobacteria	Gammaproteobacteria	Enterobacteriales	Enterobacteriaceae	Shigella
1	MAH_145	CAN_007	MAH	melanogaster	Wild	Fruit	Guts	Proteobacteria	Gammaproteobacteria	Enterobacteriales	Enterobacteriaceae	Shigella
1	MAH_146	CAN_007	MAH	melanogaster	Wild	Fruit	Guts	Proteobacteria	Gammaproteobacteria	Enterobacteriales	Enterobacteriaceae	Shigella
1	MAH_149	CAN_007	MAH	melanogaster	Wild	Fruit	Guts	Proteobacteria	Gammaproteobacteria	Enterobacteriales	Enterobacteriaceae	Shigella
1	MAH_150	CAN_007	MAH	melanogaster	Wild	Fruit	Guts	Proteobacteria	Gammaproteobacteria	Enterobacteriales	Enterobacteriaceae	Shigella
1	MAH_151	CAN_007	MAH	melanogaster	Wild	Fruit	Guts	Proteobacteria	Gammaproteobacteria	Enterobacteriales	Enterobacteriaceae	Shigella
1	MAH_152	CAN_007	MAH	melanogaster	Wild	Fruit	Guts	Proteobacteria	Gammaproteobacteria	Enterobacteriales	Enterobacteriaceae	Shigella
1	MAH_153	CAN_007	MAH	melanogaster	Wild	Fruit	Guts	Proteobacteria	Gammaproteobacteria	Enterobacteriales	Enterobacteriaceae	Shigella
1	MAH_155	CAN_007	MAH	melanogaster	Wild	Fruit	Guts	Proteobacteria	Gammaproteobacteria	Enterobacteriales	Enterobacteriaceae	Shigella
1	MAH_156	CAN_007	MAH	melanogaster	Wild	Fruit	Guts	Proteobacteria	Gammaproteobacteria	Enterobacteriales	Enterobacteriaceae	Shigella
1	MAH_157	CAN_007	MAH	melanogaster	Wild	Fruit	Guts	Proteobacteria	Gammaproteobacteria	Enterobacteriales	Enterobacteriaceae	Shigella
1	MAH_158	CAN_007	MAH	melanogaster	Wild	Fruit	Guts	Proteobacteria	Gammaproteobacteria	Enterobacteriales	Enterobacteriaceae	Shigella
1	MAH_160	CAN_007	MAH	melanogaster	Wild	Fruit	Guts	Proteobacteria	Gammaproteobacteria	Enterobacteriales	Enterobacteriaceae	Shigella
1	MAH_161	CAN_007	MAH	melanogaster	Wild	Fruit	Guts	Proteobacteria	Gammaproteobacteria	Enterobacteriales	Enterobacteriaceae	Shigella
1	MAH_162	CAN_007	MAH	melanogaster	Wild	Fruit	Guts	Proteobacteria	Gammaproteobacteria	Enterobacteriales	Enterobacteriaceae	Shigella
1	MAH_163	CAN_007	MAH	melanogaster	Wild	Fruit	Guts	Proteobacteria	Gammaproteobacteria	Enterobacteriales	Enterobacteriaceae	Shigella
1	MAH_164	CAN_007	MAH	melanogaster	Wild	Fruit	Guts	Proteobacteria	Gammaproteobacteria	Enterobacteriales	Enterobacteriaceae	Shigella
1	MAH_165	CAN_007	MAH	melanogaster	Wild	Fruit	Guts	Proteobacteria	Gammaproteobacteria	Enterobacteriales	Enterobacteriaceae	Shigella
1	MAH_166	CAN_007	MAH	melanogaster	Wild	Fruit	Guts	Proteobacteria	Gammaproteobacteria	Enterobacteriales	Enterobacteriaceae	Shigella
1	MAH_167	CAN_007	MAH	melanogaster	Wild	Fruit	Guts	Proteobacteria	Gammaproteobacteria	Enterobacteriales	Enterobacteriaceae	Shigella
1	MAH_169	CAN_007	MAH	melanogaster	Wild	Fruit	Guts	Proteobacteria	Gammaproteobacteria	Enterobacteriales	Enterobacteriaceae	Shigella
1	MAH_170	CAN_007	MAH	melanogaster	Wild	Fruit	Guts	Proteobacteria	Gammaproteobacteria	Enterobacteriales	Enterobacteriaceae	Shigella
1	MAH_171	CAN_007	MAH	melanogaster	Wild	Fruit	Guts	Proteobacteria	Gammaproteobacteria	Enterobacteriales	Enterobacteriaceae	Shigella
1	MAH_172	CAN_007	MAH	melanogaster	Wild	Fruit	Guts	Proteobacteria	Gammaproteobacteria	Enterobacteriales	Enterobacteriaceae	Shigella
1	MAH_175	CAN_007	MAH	melanogaster	Wild	Fruit	Guts	Proteobacteria	Gammaproteobacteria	Enterobacteriales	Enterobacteriaceae	Shigella
1	MAH_176	CAN_007	MAH	melanogaster	Wild	Fruit	Guts	Proteobacteria	Gammaproteobacteria	Enterobacteriales	Enterobacteriaceae	Shigella
1	MAH_177	CAN_007	MAH	melanogaster	Wild	Fruit	Guts	Proteobacteria	Gammaproteobacteria	Enterobacteriales	Enterobacteriaceae	Shigella
1	MAH_178	CAN_007	MAH	melanogaster	Wild	Fruit	Guts	Proteobacteria	Gammaproteobacteria	Enterobacteriales	Enterobacteriaceae	Shigella
1	MAH_179	CAN_007	MAH	melanogaster	Wild	Fruit	Guts	Proteobacteria	Gammaproteobacteria	Enterobacteriales	Enterobacteriaceae	Shigella
1	MAH_180	CAN_007	MAH	melanogaster	Wild	Fruit	Guts	Proteobacteria	Gammaproteobacteria	Enterobacteriales	Enterobacteriaceae	Shigella
1	MAH_181	CAN_007	MAH	melanogaster	Wild	Fruit	Guts	Proteobacteria	Gammaproteobacteria	Enterobacteriales	Enterobacteriaceae	Shigella
1	MAH_182	CAN_007	MAH	melanogaster	Wild	Fruit	Guts	Proteobacteria	Gammaproteobacteria	Enterobacteriales	Enterobacteriaceae	Shigella
1	MAH_183	CAN_007	MAH	melanogaster	Wild	Fruit	Guts	Proteobacteria	Gammaproteobacteria	Enterobacteriales	Enterobacteriaceae	Shigella
1	MAH_185	CAN_007	MAH	melanogaster	Wild	Fruit	Guts	Proteobacteria	Gammaproteobacteria	Enterobacteriales	Enterobacteriaceae	Shigella
1	MAH_186	CAN_007	MAH	melanogaster	Wild	Fruit	Guts	Proteobacteria	Gammaproteobacteria	Enterobacteriales	Enterobacteriaceae	Shigella
1	MAH_187	CAN_007	MAH	melanogaster	Wild	Fruit	Guts	Proteobacteria	Gammaproteobacteria	Enterobacteriales	Enterobacteriaceae	Shigella
1	MAH_189	CAN_007	MAH	melanogaster	Wild	Fruit	Guts	Proteobacteria	Gammaproteobacteria	Enterobacteriales	Enterobacteriaceae	Shigella
1	TBB_162	CAN_007	TBB	melanogaster	Wild	Fruit	Guts	Proteobacteria	Gammaproteobacteria	Enterobacteriales	Enterobacteriaceae	Shigella
1	TBB_209	CAN_007	TBB	melanogaster	Wild	Fruit	Guts	Proteobacteria	Gammaproteobacteria	Enterobacteriales	Enterobacteriaceae	Shigella
1	TBB_230	CAN_007	TBB	melanogaster	Wild	Fruit	Guts	Proteobacteria	Gammaproteobacteria	Enterobacteriales	Enterobacteriaceae	Shigella
1	TBB_236	CAN_007	TBB	melanogaster	Wild	Fruit	Guts	Proteobacteria	Gammaproteobacteria	Enterobacteriales	Enterobacteriaceae	Shigella
1	TBB_246	CAN_007	TBB	melanogaster	Wild	Fruit	Guts	Proteobacteria	Gammaproteobacteria	Enterobacteriales	Enterobacteriaceae	Shigella
1	TBB_273	CAN_007	TBB	melanogaster	Wild	Fruit	Guts	Proteobacteria	Gammaproteobacteria	Enterobacteriales	Enterobacteriaceae	Shigella
1	TBB_277	CAN_007	TBB	melanogaster	Wild	Fruit	Guts	Proteobacteria	Gammaproteobacteria	Enterobacteriales	Enterobacteriaceae	Shigella
1	TBB_333	CAN_007	TBB	melanogaster	Wild	Fruit	Guts	Proteobacteria	Gammaproteobacteria	Enterobacteriales	Enterobacteriaceae	Shigella
1	WOB_050	TKM_092	WOB	melanogaster	Lab	Kopp	Bodies	Proteobacteria	Alphaproteobacteria	Rhodospirillales	Acetobacteraceae	Commensalibacter
1	WOB_001	TKM_092	WOB	melanogaster	Lab	Kopp	Bodies	Proteobacteria	Alphaproteobacteria	Rhodospirillales	Acetobacteraceae	Commensalibacter
1	WOB_011	TKM_092	WOB	melanogaster	Lab	Kopp	Bodies	Proteobacteria	Alphaproteobacteria	Rhodospirillales	Acetobacteraceae	Commensalibacter
1	WOB_031	TKM_092	WOB	melanogaster	Lab	Kopp	Bodies	Proteobacteria	Alphaproteobacteria	Rhodospirillales	Acetobacteraceae	Commensalibacter
1	WOB_051	TKM_092	WOB	melanogaster	Lab	Kopp	Bodies	Proteobacteria	Alphaproteobacteria	Rhodospirillales	Acetobacteraceae	Commensalibacter
1	WOB_061	TKM_092	WOB	melanogaster	Lab	Kopp	Bodies	Proteobacteria	Alphaproteobacteria	Rhodospirillales	Acetobacteraceae	Commensalibacter
1	WOB_022	TKM_092	WOB	melanogaster	Lab	Kopp	Bodies	Proteobacteria	Alphaproteobacteria	Rhodospirillales	Acetobacteraceae	Commensalibacter
1	WOB_032	TKM_092	WOB	melanogaster	Lab	Kopp	Bodies	Proteobacteria	Alphaproteobacteria	Rhodospirillales	Acetobacteraceae	Commensalibacter
1	WOB_053	TKM_092	WOB	melanogaster	Lab	Kopp	Bodies	Proteobacteria	Alphaproteobacteria	Rhodospirillales	Acetobacteraceae	Commensalibacter
1	WOB_063	TKM_092	WOB	melanogaster	Lab	Kopp	Bodies	Proteobacteria	Alphaproteobacteria	Rhodospirillales	Acetobacteraceae	Commensalibacter
1	WOB_074	TKM_092	WOB	melanogaster	Lab	Kopp	Bodies	Proteobacteria	Alphaproteobacteria	Rhodospirillales	Acetobacteraceae	Commensalibacter
1	WOB_084	TKM_092	WOB	melanogaster	Lab	Kopp	Bodies	Proteobacteria	Alphaproteobacteria	Rhodospirillales	Acetobacteraceae	Commensalibacter
1	WOB_025	TKM_092	WOB	melanogaster	Lab	Kopp	Bodies	Proteobacteria	Alphaproteobacteria	Rhodospirillales	Acetobacteraceae	Commensalibacter
1	WOB_075	TKM_092	WOB	melanogaster	Lab	Kopp	Bodies	Proteobacteria	Alphaproteobacteria	Rhodospirillales	Acetobacteraceae	Commensalibacter
1	WOB_085	TKM_092	WOB	melanogaster	Lab	Kopp	Bodies	Proteobacteria	Alphaproteobacteria	Rhodospirillales	Acetobacteraceae	Commensalibacter
1	WOB_095	TKM_092	WOB	melanogaster	Lab	Kopp	Bodies	Proteobacteria	Alphaproteobacteria	Rhodospirillales	Acetobacteraceae	Commensalibacter
1	WOB_076	TKM_092	WOB	melanogaster	Lab	Kopp	Bodies	Proteobacteria	Alphaproteobacteria	Rhodospirillales	Acetobacteraceae	Commensalibacter
1	WOB_008	TKM_092	WOB	melanogaster	Lab	Kopp	Bodies	Proteobacteria	Alphaproteobacteria	Rhodospirillales	Acetobacteraceae	Commensalibacter
1	WOB_028	TKM_092	WOB	melanogaster	Lab	Kopp	Bodies	Proteobacteria	Alphaproteobacteria	Rhodospirillales	Acetobacteraceae	Commensalibacter
1	WOB_058	TKM_092	WOB	melanogaster	Lab	Kopp	Bodies	Proteobacteria	Alphaproteobacteria	Rhodospirillales	Acetobacteraceae	Commensalibacter
1	WOB_068	TKM_092	WOB	melanogaster	Lab	Kopp	Bodies	Proteobacteria	Alphaproteobacteria	Rhodospirillales	Acetobacteraceae	Commensalibacter
1	WOB_078	TKM_092	WOB	melanogaster	Lab	Kopp	Bodies	Proteobacteria	Alphaproteobacteria	Rhodospirillales	Acetobacteraceae	Commensalibacter
1	WOB_059	TKM_092	WOB	melanogaster	Lab	Kopp	Bodies	Proteobacteria	Alphaproteobacteria	Rhodospirillales	Acetobacteraceae	Commensalibacter
1	WOE_057	TKM_092	WOE	melanogaster	Lab	Kopp	External	Proteobacteria	Alphaproteobacteria	Rhodospirillales	Acetobacteraceae	Commensalibacter
1	WOE_069	TKM_092	WOE	melanogaster	Lab	Kopp	External	Proteobacteria	Alphaproteobacteria	Rhodospirillales	Acetobacteraceae	Commensalibacter
1	XDA_010	TKM_092	XDA	melanogaster	Lab	Kopp	Guts	Proteobacteria	Alphaproteobacteria	Rhodospirillales	Acetobacteraceae	Commensalibacter
1	XDA_050	TKM_092	XDA	melanogaster	Lab	Kopp	Guts	Proteobacteria	Alphaproteobacteria	Rhodospirillales	Acetobacteraceae	Commensalibacter
1	XDA_070	TKM_092	XDA	melanogaster	Lab	Kopp	Guts	Proteobacteria	Alphaproteobacteria	Rhodospirillales	Acetobacteraceae	Commensalibacter
1	XDA_031	TKM_092	XDA	melanogaster	Lab	Kopp	Guts	Proteobacteria	Alphaproteobacteria	Rhodospirillales	Acetobacteraceae	Commensalibacter
1	XDA_111	TKM_092	XDA	melanogaster	Lab	Kopp	Guts	Proteobacteria	Alphaproteobacteria	Rhodospirillales	Acetobacteraceae	Commensalibacter
1	XDA_121	TKM_092	XDA	melanogaster	Lab	Kopp	Guts	Proteobacteria	Alphaproteobacteria	Rhodospirillales	Acetobacteraceae	Commensalibacter
1	XDA_062	TKM_092	XDA	melanogaster	Lab	Kopp	Guts	Proteobacteria	Alphaproteobacteria	Rhodospirillales	Acetobacteraceae	Commensalibacter
1	XDA_013	TKM_092	XDA	melanogaster	Lab	Kopp	Guts	Proteobacteria	Alphaproteobacteria	Rhodospirillales	Acetobacteraceae	Commensalibacter
1	XDA_093	TKM_092	XDA	melanogaster	Lab	Kopp	Guts	Proteobacteria	Alphaproteobacteria	Rhodospirillales	Acetobacteraceae	Commensalibacter
1	XDA_094	TKM_092	XDA	melanogaster	Lab	Kopp	Guts	Proteobacteria	Alphaproteobacteria	Rhodospirillales	Acetobacteraceae	Commensalibacter
1	XDA_104	TKM_092	XDA	melanogaster	Lab	Kopp	Guts	Proteobacteria	Alphaproteobacteria	Rhodospirillales	Acetobacteraceae	Commensalibacter
1	XDA_114	TKM_092	XDA	melanogaster	Lab	Kopp	Guts	Proteobacteria	Alphaproteobacteria	Rhodospirillales	Acetobacteraceae	Commensalibacter
1	XDA_025	TKM_092	XDA	melanogaster	Lab	Kopp	Guts	Proteobacteria	Alphaproteobacteria	Rhodospirillales	Acetobacteraceae	Commensalibacter
1	XDA_066	TKM_092	XDA	melanogaster	Lab	Kopp	Guts	Proteobacteria	Alphaproteobacteria	Rhodospirillales	Acetobacteraceae	Commensalibacter
1	XDA_027	TKM_092	XDA	melanogaster	Lab	Kopp	Guts	Proteobacteria	Alphaproteobacteria	Rhodospirillales	Acetobacteraceae	Commensalibacter
1	XDA_009	TKM_092	XDA	melanogaster	Lab	Kopp	Guts	Proteobacteria	Alphaproteobacteria	Rhodospirillales	Acetobacteraceae	Commensalibacter
1	XDA_039	TKM_092	XDA	melanogaster	Lab	Kopp	Guts	Proteobacteria	Alphaproteobacteria	Rhodospirillales	Acetobacteraceae	Commensalibacter
1	XDS_115	TKM_092	XDS	melanogaster	Lab	Kopp	Guts	Proteobacteria	Alphaproteobacteria	Rhodospirillales	Acetobacteraceae	Commensalibacter
1	XDY_051	TKM_092	XDY	melanogaster	Lab	Kopp	Guts	Proteobacteria	Alphaproteobacteria	Rhodospirillales	Acetobacteraceae	Commensalibacter
1	XDY_124	TKM_092	XDY	melanogaster	Lab	Kopp	Guts	Proteobacteria	Alphaproteobacteria	Rhodospirillales	Acetobacteraceae	Commensalibacter
1	XDY_108	TKM_092	XDY	melanogaster	Lab	Kopp	Guts	Proteobacteria	Alphaproteobacteria	Rhodospirillales	Acetobacteraceae	Commensalibacter
1	MAH_021	TKM_092	MAH	melanogaster	Wild	Fruit	Guts	Proteobacteria	Alphaproteobacteria	Rhodospirillales	Acetobacteraceae	Commensalibacter
1	MAH_042	TKM_092	MAH	melanogaster	Wild	Fruit	Guts	Proteobacteria	Alphaproteobacteria	Rhodospirillales	Acetobacteraceae	Commensalibacter
1	MAH_057	TKM_092	MAH	melanogaster	Wild	Fruit	Guts	Proteobacteria	Alphaproteobacteria	Rhodospirillales	Acetobacteraceae	Commensalibacter
1	MAH_068	TKM_092	MAH	melanogaster	Wild	Fruit	Guts	Proteobacteria	Alphaproteobacteria	Rhodospirillales	Acetobacteraceae	Commensalibacter
1	MAH_072	TKM_092	MAH	melanogaster	Wild	Fruit	Guts	Proteobacteria	Alphaproteobacteria	Rhodospirillales	Acetobacteraceae	Commensalibacter
1	MAH_085	TKM_092	MAH	melanogaster	Wild	Fruit	Guts	Proteobacteria	Alphaproteobacteria	Rhodospirillales	Acetobacteraceae	Commensalibacter
1	MAH_088	TKM_092	MAH	melanogaster	Wild	Fruit	Guts	Proteobacteria	Alphaproteobacteria	Rhodospirillales	Acetobacteraceae	Commensalibacter
1	MAH_093	TKM_092	MAH	melanogaster	Wild	Fruit	Guts	Proteobacteria	Alphaproteobacteria	Rhodospirillales	Acetobacteraceae	Commensalibacter
1	MAH_094	TKM_092	MAH	melanogaster	Wild	Fruit	Guts	Proteobacteria	Alphaproteobacteria	Rhodospirillales	Acetobacteraceae	Commensalibacter
1	MAH_115	TKM_092	MAH	melanogaster	Wild	Fruit	Guts	Proteobacteria	Alphaproteobacteria	Rhodospirillales	Acetobacteraceae	Commensalibacter
1	TBB_426	TKM_092	TBB	melanogaster	Wild	Fruit	Guts	Proteobacteria	Alphaproteobacteria	Rhodospirillales	Acetobacteraceae	Commensalibacter
1	CAN_039	MOV_063	CAN	melanogaster	Lab	Kimbrell	Guts	Proteobacteria	Gammaproteobacteria	Enterobacteriales	Enterobacteriaceae	Unclassified_Enterobacteriaceae
1	WOP_042	XDE_077	WOP	melanogaster	Lab	Kopp	Pupae	Proteobacteria	Gammaproteobacteria	Enterobacteriales	Enterobacteriaceae	Enterobacteriaceae Group Orbus
1	WOP_035	XDE_077	WOP	melanogaster	Lab	Kopp	Pupae	Proteobacteria	Gammaproteobacteria	Enterobacteriales	Enterobacteriaceae	Enterobacteriaceae Group Orbus
1	XDE_077	XDE_077	XDE	melanogaster	Lab	Kopp	Guts	Proteobacteria	Gammaproteobacteria	Enterobacteriales	Enterobacteriaceae	Enterobacteriaceae Group Orbus
1	ORF_074	ORM_061	ORF	melanogaster	Lab	Kimbrell	Guts	Proteobacteria	Gammaproteobacteria	Enterobacteriales	Enterobacteriaceae	Unclassified_Enterobacteriaceae
1	ORF_005	ORM_061	ORF	melanogaster	Lab	Kimbrell	Guts	Proteobacteria	Gammaproteobacteria	Enterobacteriales	Enterobacteriaceae	Unclassified_Enterobacteriaceae
1	ORF_068	ORM_061	ORF	melanogaster	Lab	Kimbrell	Guts	Proteobacteria	Gammaproteobacteria	Enterobacteriales	Enterobacteriaceae	Unclassified_Enterobacteriaceae
1	ORM_061	ORM_061	ORM	melanogaster	Lab	Kimbrell	Guts	Proteobacteria	Gammaproteobacteria	Enterobacteriales	Enterobacteriaceae	Unclassified_Enterobacteriaceae
1	ORM_043	ORM_061	ORM	melanogaster	Lab	Kimbrell	Guts	Proteobacteria	Gammaproteobacteria	Enterobacteriales	Enterobacteriaceae	Unclassified_Enterobacteriaceae
1	ORM_084	ORM_061	ORM	melanogaster	Lab	Kimbrell	Guts	Proteobacteria	Gammaproteobacteria	Enterobacteriales	Enterobacteriaceae	Unclassified_Enterobacteriaceae
1	ORM_015	ORM_061	ORM	melanogaster	Lab	Kimbrell	Guts	Proteobacteria	Gammaproteobacteria	Enterobacteriales	Enterobacteriaceae	Unclassified_Enterobacteriaceae
1	ORM_086	ORM_061	ORM	melanogaster	Lab	Kimbrell	Guts	Proteobacteria	Gammaproteobacteria	Enterobacteriales	Enterobacteriaceae	Unclassified_Enterobacteriaceae
1	XDA_083	XDA_083	XDA	melanogaster	Lab	Kopp	Guts	Proteobacteria	Gammaproteobacteria	Enterobacteriales	Enterobacteriaceae	Enterobacteriaceae Group Orbus
1	XDO_266	XDO_266	XDO	melanogaster	Lab	Kopp	Guts	Proteobacteria	Gammaproteobacteria	Enterobacteriales	Enterobacteriaceae	Enterobacteriaceae Group Orbus
1	XDY_117	XDY_117	XDY	melanogaster	Lab	Kopp	Guts	Proteobacteria	Gammaproteobacteria	Enterobacteriales	Enterobacteriaceae	Enterobacteriaceae Group Orbus
1	XDY_021	XDY_021	XDY	melanogaster	Lab	Kopp	Guts	Proteobacteria	Gammaproteobacteria	Enterobacteriales	Enterobacteriaceae	Providencia
1	XDY_062	XDY_021	XDY	melanogaster	Lab	Kopp	Guts	Proteobacteria	Gammaproteobacteria	Enterobacteriales	Enterobacteriaceae	Providencia
1	XDY_098	XDY_021	XDY	melanogaster	Lab	Kopp	Guts	Proteobacteria	Gammaproteobacteria	Enterobacteriales	Enterobacteriaceae	Providencia
1	TBB_154	TBB_154	TBB	melanogaster	Wild	Fruit	Guts	Proteobacteria	Gammaproteobacteria	Enterobacteriales	Enterobacteriaceae	Enterobacteriaceae Group Orbus
1	TBB_310	TBB_154	TBB	melanogaster	Wild	Fruit	Guts	Proteobacteria	Gammaproteobacteria	Enterobacteriales	Enterobacteriaceae	Enterobacteriaceae Group Orbus
1	TBB_365	TBB_154	TBB	melanogaster	Wild	Fruit	Guts	Proteobacteria	Gammaproteobacteria	Enterobacteriales	Enterobacteriaceae	Enterobacteriaceae Group Orbus
1	WOP_086	HCF_018	WOP	melanogaster	Lab	Kopp	Pupae	Proteobacteria	Gammaproteobacteria	Enterobacteriales	Enterobacteriaceae	Enterobacteriaceae Group Orbus
1	XDA_057	HCF_018	XDA	melanogaster	Lab	Kopp	Guts	Proteobacteria	Gammaproteobacteria	Enterobacteriales	Enterobacteriaceae	Enterobacteriaceae Group Orbus
1	XDA_059	HCF_018	XDA	melanogaster	Lab	Kopp	Guts	Proteobacteria	Gammaproteobacteria	Enterobacteriales	Enterobacteriaceae	Enterobacteriaceae Group Orbus
1	MED_040	XDM_053	MED	melanogaster	Lab	Kopp	Media	Proteobacteria	Gammaproteobacteria	Enterobacteriales	Enterobacteriaceae	Enterobacteriaceae Group Orbus
1	MED_060	XDM_053	MED	melanogaster	Lab	Kopp	Media	Proteobacteria	Gammaproteobacteria	Enterobacteriales	Enterobacteriaceae	Enterobacteriaceae Group Orbus
1	MED_070	XDM_053	MED	melanogaster	Lab	Kopp	Media	Proteobacteria	Gammaproteobacteria	Enterobacteriales	Enterobacteriaceae	Enterobacteriaceae Group Orbus
1	MED_080	XDM_053	MED	melanogaster	Lab	Kopp	Media	Proteobacteria	Gammaproteobacteria	Enterobacteriales	Enterobacteriaceae	Enterobacteriaceae Group Orbus
1	MED_100	XDM_053	MED	melanogaster	Lab	Kopp	Media	Proteobacteria	Gammaproteobacteria	Enterobacteriales	Enterobacteriaceae	Enterobacteriaceae Group Orbus
1	MED_011	XDM_053	MED	melanogaster	Lab	Kopp	Media	Proteobacteria	Gammaproteobacteria	Enterobacteriales	Enterobacteriaceae	Enterobacteriaceae Group Orbus
1	MED_041	XDM_053	MED	melanogaster	Lab	Kopp	Media	Proteobacteria	Gammaproteobacteria	Enterobacteriales	Enterobacteriaceae	Enterobacteriaceae Group Orbus
1	MED_061	XDM_053	MED	melanogaster	Lab	Kopp	Media	Proteobacteria	Gammaproteobacteria	Enterobacteriales	Enterobacteriaceae	Enterobacteriaceae Group Orbus
1	MED_071	XDM_053	MED	melanogaster	Lab	Kopp	Media	Proteobacteria	Gammaproteobacteria	Enterobacteriales	Enterobacteriaceae	Enterobacteriaceae Group Orbus
1	MED_081	XDM_053	MED	melanogaster	Lab	Kopp	Media	Proteobacteria	Gammaproteobacteria	Enterobacteriales	Enterobacteriaceae	Enterobacteriaceae Group Orbus
1	MED_042	XDM_053	MED	melanogaster	Lab	Kopp	Media	Proteobacteria	Gammaproteobacteria	Enterobacteriales	Enterobacteriaceae	Enterobacteriaceae Group Orbus
1	MED_052	XDM_053	MED	melanogaster	Lab	Kopp	Media	Proteobacteria	Gammaproteobacteria	Enterobacteriales	Enterobacteriaceae	Enterobacteriaceae Group Orbus
1	MED_062	XDM_053	MED	melanogaster	Lab	Kopp	Media	Proteobacteria	Gammaproteobacteria	Enterobacteriales	Enterobacteriaceae	Enterobacteriaceae Group Orbus
1	MED_082	XDM_053	MED	melanogaster	Lab	Kopp	Media	Proteobacteria	Gammaproteobacteria	Enterobacteriales	Enterobacteriaceae	Enterobacteriaceae Group Orbus
1	MED_092	XDM_053	MED	melanogaster	Lab	Kopp	Media	Proteobacteria	Gammaproteobacteria	Enterobacteriales	Enterobacteriaceae	Enterobacteriaceae Group Orbus
1	MED_112	XDM_053	MED	melanogaster	Lab	Kopp	Media	Proteobacteria	Gammaproteobacteria	Enterobacteriales	Enterobacteriaceae	Enterobacteriaceae Group Orbus
1	MED_122	XDM_053	MED	melanogaster	Lab	Kopp	Media	Proteobacteria	Gammaproteobacteria	Enterobacteriales	Enterobacteriaceae	Enterobacteriaceae Group Orbus
1	MED_013	XDM_053	MED	melanogaster	Lab	Kopp	Media	Proteobacteria	Gammaproteobacteria	Enterobacteriales	Enterobacteriaceae	Enterobacteriaceae Group Orbus
1	MED_063	XDM_053	MED	melanogaster	Lab	Kopp	Media	Proteobacteria	Gammaproteobacteria	Enterobacteriales	Enterobacteriaceae	Enterobacteriaceae Group Orbus
1	MED_073	XDM_053	MED	melanogaster	Lab	Kopp	Media	Proteobacteria	Gammaproteobacteria	Enterobacteriales	Enterobacteriaceae	Enterobacteriaceae Group Orbus
1	MED_093	XDM_053	MED	melanogaster	Lab	Kopp	Media	Proteobacteria	Gammaproteobacteria	Enterobacteriales	Enterobacteriaceae	Enterobacteriaceae Group Orbus
1	MED_103	XDM_053	MED	melanogaster	Lab	Kopp	Media	Proteobacteria	Gammaproteobacteria	Enterobacteriales	Enterobacteriaceae	Enterobacteriaceae Group Orbus
1	MED_113	XDM_053	MED	melanogaster	Lab	Kopp	Media	Proteobacteria	Gammaproteobacteria	Enterobacteriales	Enterobacteriaceae	Enterobacteriaceae Group Orbus
1	MED_123	XDM_053	MED	melanogaster	Lab	Kopp	Media	Proteobacteria	Gammaproteobacteria	Enterobacteriales	Enterobacteriaceae	Enterobacteriaceae Group Orbus
1	MED_004	XDM_053	MED	melanogaster	Lab	Kopp	Media	Proteobacteria	Gammaproteobacteria	Enterobacteriales	Enterobacteriaceae	Enterobacteriaceae Group Orbus
1	MED_014	XDM_053	MED	melanogaster	Lab	Kopp	Media	Proteobacteria	Gammaproteobacteria	Enterobacteriales	Enterobacteriaceae	Enterobacteriaceae Group Orbus
1	MED_044	XDM_053	MED	melanogaster	Lab	Kopp	Media	Proteobacteria	Gammaproteobacteria	Enterobacteriales	Enterobacteriaceae	Enterobacteriaceae Group Orbus
1	MED_054	XDM_053	MED	melanogaster	Lab	Kopp	Media	Proteobacteria	Gammaproteobacteria	Enterobacteriales	Enterobacteriaceae	Enterobacteriaceae Group Orbus
1	MED_064	XDM_053	MED	melanogaster	Lab	Kopp	Media	Proteobacteria	Gammaproteobacteria	Enterobacteriales	Enterobacteriaceae	Enterobacteriaceae Group Orbus
1	MED_084	XDM_053	MED	melanogaster	Lab	Kopp	Media	Proteobacteria	Gammaproteobacteria	Enterobacteriales	Enterobacteriaceae	Enterobacteriaceae Group Orbus
1	MED_094	XDM_053	MED	melanogaster	Lab	Kopp	Media	Proteobacteria	Gammaproteobacteria	Enterobacteriales	Enterobacteriaceae	Enterobacteriaceae Group Orbus
1	MED_104	XDM_053	MED	melanogaster	Lab	Kopp	Media	Proteobacteria	Gammaproteobacteria	Enterobacteriales	Enterobacteriaceae	Enterobacteriaceae Group Orbus
1	MED_124	XDM_053	MED	melanogaster	Lab	Kopp	Media	Proteobacteria	Gammaproteobacteria	Enterobacteriales	Enterobacteriaceae	Enterobacteriaceae Group Orbus
1	MED_005	XDM_053	MED	melanogaster	Lab	Kopp	Media	Proteobacteria	Gammaproteobacteria	Enterobacteriales	Enterobacteriaceae	Enterobacteriaceae Group Orbus
1	MED_035	XDM_053	MED	melanogaster	Lab	Kopp	Media	Proteobacteria	Gammaproteobacteria	Enterobacteriales	Enterobacteriaceae	Enterobacteriaceae Group Orbus
1	MED_085	XDM_053	MED	melanogaster	Lab	Kopp	Media	Proteobacteria	Gammaproteobacteria	Enterobacteriales	Enterobacteriaceae	Enterobacteriaceae Group Orbus
1	MED_105	XDM_053	MED	melanogaster	Lab	Kopp	Media	Proteobacteria	Gammaproteobacteria	Enterobacteriales	Enterobacteriaceae	Enterobacteriaceae Group Orbus
1	MED_125	XDM_053	MED	melanogaster	Lab	Kopp	Media	Proteobacteria	Gammaproteobacteria	Enterobacteriales	Enterobacteriaceae	Enterobacteriaceae Group Orbus
1	MED_026	XDM_053	MED	melanogaster	Lab	Kopp	Media	Proteobacteria	Gammaproteobacteria	Enterobacteriales	Enterobacteriaceae	Enterobacteriaceae Group Orbus
1	MED_036	XDM_053	MED	melanogaster	Lab	Kopp	Media	Proteobacteria	Gammaproteobacteria	Enterobacteriales	Enterobacteriaceae	Enterobacteriaceae Group Orbus
1	MED_046	XDM_053	MED	melanogaster	Lab	Kopp	Media	Proteobacteria	Gammaproteobacteria	Enterobacteriales	Enterobacteriaceae	Enterobacteriaceae Group Orbus
1	MED_086	XDM_053	MED	melanogaster	Lab	Kopp	Media	Proteobacteria	Gammaproteobacteria	Enterobacteriales	Enterobacteriaceae	Enterobacteriaceae Group Orbus
1	MED_096	XDM_053	MED	melanogaster	Lab	Kopp	Media	Proteobacteria	Gammaproteobacteria	Enterobacteriales	Enterobacteriaceae	Enterobacteriaceae Group Orbus
1	MED_126	XDM_053	MED	melanogaster	Lab	Kopp	Media	Proteobacteria	Gammaproteobacteria	Enterobacteriales	Enterobacteriaceae	Enterobacteriaceae Group Orbus
1	MED_047	XDM_053	MED	melanogaster	Lab	Kopp	Media	Proteobacteria	Gammaproteobacteria	Enterobacteriales	Enterobacteriaceae	Enterobacteriaceae Group Orbus
1	MED_057	XDM_053	MED	melanogaster	Lab	Kopp	Media	Proteobacteria	Gammaproteobacteria	Enterobacteriales	Enterobacteriaceae	Enterobacteriaceae Group Orbus
1	MED_087	XDM_053	MED	melanogaster	Lab	Kopp	Media	Proteobacteria	Gammaproteobacteria	Enterobacteriales	Enterobacteriaceae	Enterobacteriaceae Group Orbus
1	MED_097	XDM_053	MED	melanogaster	Lab	Kopp	Media	Proteobacteria	Gammaproteobacteria	Enterobacteriales	Enterobacteriaceae	Enterobacteriaceae Group Orbus
1	MED_107	XDM_053	MED	melanogaster	Lab	Kopp	Media	Proteobacteria	Gammaproteobacteria	Enterobacteriales	Enterobacteriaceae	Enterobacteriaceae Group Orbus
1	MED_127	XDM_053	MED	melanogaster	Lab	Kopp	Media	Proteobacteria	Gammaproteobacteria	Enterobacteriales	Enterobacteriaceae	Enterobacteriaceae Group Orbus
[truncated: 1,244 more rows]
