# Supplementary material for: Bacterial Communities of Diverse Drosophila Species: Ecological Context of a Host–Microbe Model System
Source: PubMed Central journal article supplement (PMC3178584; doi:10.1371/journal.pgen.1002272), 2011-09-22

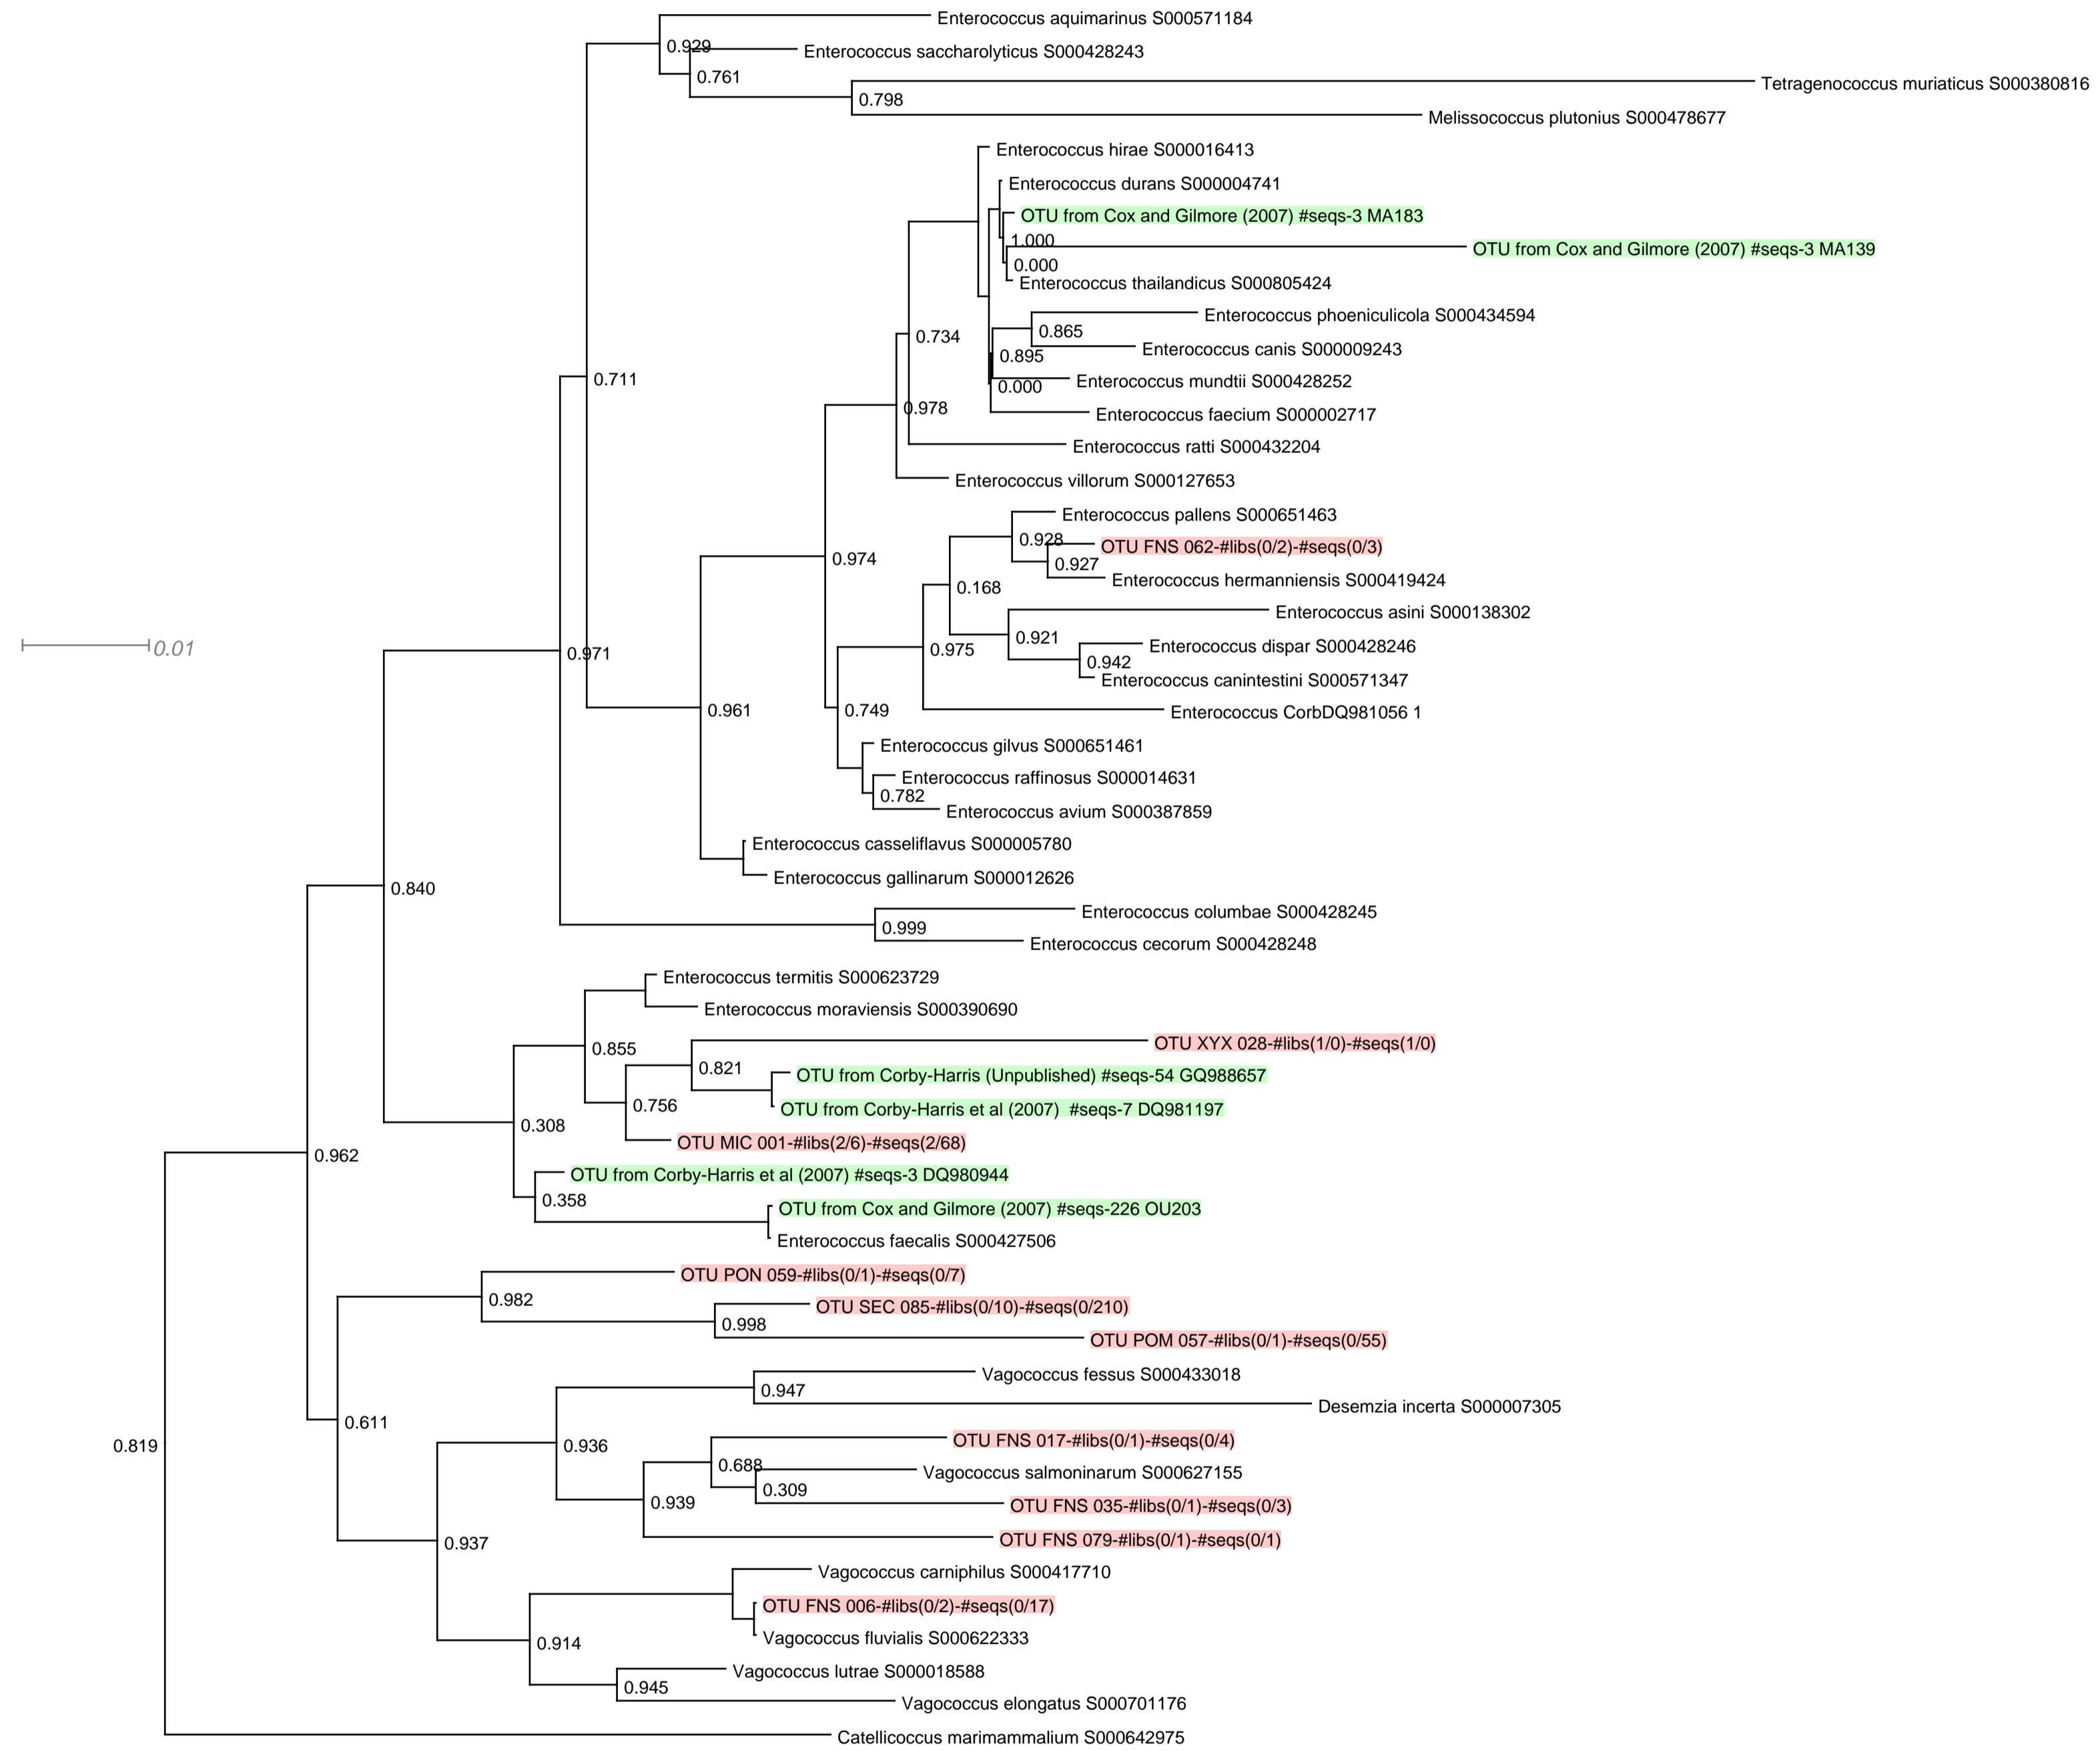

Supplement: pgen.1002272.s010.pdf [file pgen.1002272.s010.pdf]
